# Supplementary material for: Microbial metagenome-assembled genomes of the Fram Strait from short and long read sequencing platforms
Source: PeerJ. 2021 Jun 30;9:e11721. doi: 10.7717/peerj.11721 (PMC8254474; doi:10.7717/peerj.11721)
Supplement: Supplemental Information 1 [file peerj-09-11721-s001.xlsx]

## Sheet: Supplementary_table_S1
Supplementary Table S1. Metadata on the collected water samples used for metagenomic sequencing.
library_name	ENA_Sample_accession_number	Sampling_Station	Water_mass	Sampling_date	Latitude (deg)	Longtidue (deg)	Depth (m)	Temperature (°C)	Salinity (psu)	Fluorescence (V)
FRAM18_4514_A	SAMEA7670911	PS114_46-8	Arctic	27.07.2018	79.013	-5.28143	16	-1.52	32.61	1.72
FRAM18_4514_B	SAMEA7670914	PS114_40-3	Mixed	25.07.2018	80.1604	0.148768	75	0.59	34.48	0.53
FRAM18_4514_C	SAMEA7670917	PS114_36-2	Arctic	24.07.2018	80.8562	-0.142645	30	-1.65	33.9	0.31
FRAM18_4514_D	SAMEA7670920	PS114_12-1	Atlantic	18.07.2018	79.0118	7.0351	23	5.99	34.99	3.74
FRAM18_4502_E	SAMEA7670910	PS114_49-2	Arctic	28.07.2018	79.6154	-16.5255	25	-1.62	31.48	0.13
FRAM18_4502_F	SAMEA7670912	PS114_43-4	Arctic	26.07.2018	78.817	-2.76948	15	-1.47	32.74	1.8
FRAM18_4502_G	SAMEA7670913	PS114_41-1	Arctic	25.07.2018	79.8306	-0.009995	50	-1.75	33.97	0.14
FRAM18_4502_H	SAMEA7670915	PS114_40-3	Arctic	25.07.2018	80.1604	0.148768	12	-1.21	32.59	0.4
FRAM18_4571_H	SAMEA7670921		Arctic
FRAM18_4502_I	SAMEA7670916	PS114_38-1	Mixed	25.07.2018	80.4891	0.038608	50	2.4	34.73	0.65
FRAM18_4571_I	SAMEA7670922		Mixed
FRAM18_4502_J	SAMEA7670918	PS114_34-1	Mixed	24.07.2018	81.1613	-0.078996	24	1.13	33.95	1.67
FRAM18_4502_K	SAMEA7670919	PS114_13-2	Atlantic	18.07.2018	79.019	8.00784	15	6.18	35.01	3.89
FRAM18_4571_K	SAMEA7670923		Atlantic

## Sheet: Supplementary_table_S2
Supplementary Table S2. Summary statistics and taxonomic affiliation for species representative MAGs reconstructed from Fram Strait metagenomes. Samples were derived from the 0.2 - 3 µm fraction and typically coincided with the deep chlorophyll maximum depth.
								CheckM			Barrnap				SILVA_138_NR99-phylogenetically_placed_using_parsimony_in_ARB	GTDB
MAG_ID	ENA_MAG_sample_accession	source_library_name	Sequencing_platform	Length (bp)	N50 (bp)	#_contigs	GC	Completeness	Contamination	Strain_heterogeneity	16S_rRNA_gene_present (length in bp)	5S_rRNA_gene_present (length in bp)	23S_rRNA_gene_present (length in bp)	MIMAGS_standard	taxonomy	taxonomy
FRAM18_bin013	SAMEA7768526	FRAM18_4502_E	Illumina HiSeq3000	2358857	411242	8	58.66	58.12	0.85	0	-	-	-	Medium-quality		d__Bacteria;p__Actinobacteriota;c__Acidimicrobiia;o__Microtrichales;f__UBA10347;g__UBA10347;s__
FRAM18_bin216	SAMEA7768557	FRAM18_4502_J	Illumina HiSeq3000	1358744	271703	8	38.09	70.61	0	0	-	-	-	Medium-quality		d__Bacteria;p__Bacteroidota;c__Bacteroidia;o__Flavobacteriales;f__Flavobacteriaceae;g__MAG-120531;s__
FRAM18_bin064	SAMEA7768522	FRAM18_4502_E	Illumina HiSeq3000	975992	92930	12	35.1	84.34	0	0	-	-	-	Medium-quality		d__Bacteria;p__Proteobacteria;c__Alphaproteobacteria;o__Rhizobiales;f__TMED25;g__MED-G09;s__
FRAM18_bin081	SAMEA7768481	FRAM18_4502_E	Illumina HiSeq3000	1392990	229107	13	32.92	93.26	0	0	yes (1480)	yes (111)	yes (2799)	High-quality draft	Bacteria/Proteobacteria/Alphaproteobacteria/Parvibaculales/Parvibaculaceae/uncultured	d__Bacteria;p__Proteobacteria;c__Alphaproteobacteria;o__Rhizobiales;f__TMED25;g__;s__
FRAM18_bin107	SAMEA7768568	FRAM18_4502_E	Illumina HiSeq3000	1256718	153817	13	36.72	66.67	0	0	-	yes (112)	yes (1281)	Medium-quality		d__Archaea;p__Thermoplasmatota;c__Poseidoniia;o__Poseidoniales;f__Poseidoniaceae;g__MGIIa-L2;s__
FRAM18_bin308	SAMEA7768508	FRAM18_4502_E	Illumina HiSeq3000	1293325	150367	13	34	83.05	0	0	-	yes (109)	-	Medium-quality		d__Bacteria;p__Proteobacteria;c__Gammaproteobacteria;o__SAR86;f__D2472;g__;s__
FRAM18_bin345	SAMEA7768612	FRAM18_4502_H	Illumina HiSeq3000	945908	109132	24	32.73	93.41	0	0	yes (1557)	yes (112)	yes (2996)	High-quality draft	Bacteria/Marinimicrobia (SAR406 clade)	d__Bacteria;p__Marinisomatota;c__Marinisomatia;o__Marinisomatales;f__Marinisomataceae;g__Marinisoma;s__
FRAM18_bin185	SAMEA7768595	FRAM18_4502_F	Illumina HiSeq3000	1913537	102977	26	30.7	99.26	0	0	yes (990)	yes (105)	-	Medium-quality	Bacteria/Bacteroidota/Bacteroidia/Flavobacteriales/Flavobacteriaceae_1/NS5 marine group	d__Bacteria;p__Bacteroidota;c__Bacteroidia;o__Flavobacteriales;f__Flavobacteriaceae;g__GCA-002723295;s__
FRAM18_bin273	SAMEA7768558	FRAM18_4502_G	Illumina HiSeq3000	1862708	137328	26	37.13	79.1	1.06	0	yes (1536)	-	yes (1303)	Medium-quality	Bacteria/Proteobacteria/Gammaproteobacteria/Steroidobacterales_Woeseiaceae/Woeseia	d__Bacteria;p__Proteobacteria;c__Gammaproteobacteria;o__Woeseiales;f__Woeseiaceae;g__GCA-002728725;s__
FRAM18_bin006	SAMEA7768573	FRAM18_4502_H	Illumina HiSeq3000	2646701	222102	27	47.56	97.44	2.14	0	yes (683)	yes (112)	-	Medium-quality	Bacteria/Actinobacteriota/Acidimicrobiia/Microtrichales/Microtrichaceae/Sva0996 marine group	d__Bacteria;p__Actinobacteriota;c__Acidimicrobiia;o__Microtrichales;f__TK06;g__UBA9040;s__
FRAM18_bin212	SAMEA7768578	FRAM18_4502_G	Illumina HiSeq3000	1520098	33552	32	33.75	66.67	0	0	-	-	-	Medium-quality		d__Bacteria;p__Bacteroidota;c__Bacteroidia;o__Flavobacteriales;f__GCA-002722245;g__;s__
FRAM18_bin316	SAMEA7768516	FRAM18_4502_F	Illumina HiSeq3000	2089412	90811	32	45.37	81.48	0	0	-	yes (94)	-	Medium-quality		d__Bacteria;p__Proteobacteria;c__Gammaproteobacteria;o__Pseudomonadales;f__Nitrincolaceae;g__ASP10-02a;s__
FRAM18_bin209	SAMEA7768503	FRAM18_4514_B	Illumina HiSeq3000	1434131	82057	33	35.59	62.8	0	0	-	-	-	Medium-quality		d__Bacteria;p__Bacteroidota;c__Bacteroidia;o__Flavobacteriales;f__1G12;g__;s__
FRAM18_bin294	SAMEA7768513	FRAM18_4502_E	Illumina HiSeq3000	1330848	68183	35	41.53	94.46	0.93	33.33	yes (1158)	yes (111)	-	Medium-quality	Bacteria/Proteobacteria/Gammaproteobacteria/Cellvibrionales/Porticoccaceae/Porticoccus	d__Bacteria;p__Proteobacteria;c__Gammaproteobacteria;o__Pseudomonadales;f__Porticoccaceae;g__Porticoccus;s__
FRAM18_bin202	SAMEA7768599	FRAM18_4502_I	Illumina HiSeq3000	2146638	122491	36	35.17	96.22	0	0	-	yes x 2 (102)	-	Medium-quality		d__Bacteria;p__Bacteroidota;c__Bacteroidia;o__Flavobacteriales;f__Crocinitomicaceae;g__UBA4466;s__
FRAM18_bin001	SAMEA7768546	FRAM18_4514_B	Illumina HiSeq3000	1094370	47498	38	51.63	90.81	0.88	100	yes (1519)	yes (110)	yes (3095)	High-quality draft	Bacteria/Actinobacteriota/Actinobacteria/Micrococcales_3/Microbacteriaceae/Candidatus Aquiluna	d__Bacteria;p__Actinobacteriota;c__Actinobacteria;o__Actinomycetales;f__Microbacteriaceae;g__Aquiluna;s__
FRAM18_bin072	SAMEA7768551	FRAM18_4502_H	Illumina HiSeq3000	1206175	51980	39	32.38	100	1.2	100	-	-	-	Medium-quality		d__Bacteria;p__Proteobacteria;c__Alphaproteobacteria;o__Pelagibacterales;f__AG-422-B15;g__;s__
FRAM18_bin174	SAMEA7768554	FRAM18_4502_J	Illumina HiSeq3000	2271138	82094	39	35.43	100	0.54	0	yes (1243)	-	-	Medium-quality	Bacteria/Bacteroidota/Bacteroidia/Flavobacteriales/Cryomorphaceae_3/uncultured	d__Bacteria;p__Bacteroidota;c__Bacteroidia;o__Flavobacteriales;f__UBA7430;g__UBA6772;s__UBA6772 sp002685115
FRAM18_bin075	SAMEA7768529	FRAM18_4514_D	Illumina HiSeq3000	782812	39128	42	32.13	65.66	0	0	-	-	-	Medium-quality		d__Bacteria;p__Proteobacteria;c__Alphaproteobacteria;o__Pelagibacterales;f__AG-422-B15;g__;s__
FRAM18_bin302	SAMEA7768539	FRAM18_4514_C	Illumina HiSeq3000	1062435	38666	44	37.74	59.53	0.37	0	yes (1552)	yes (99)	yes (2925)	Medium-quality	Bacteria/Proteobacteria/Gammaproteobacteria/SAR86 clade	d__Bacteria;p__Proteobacteria;c__Gammaproteobacteria;o__SAR86;f__SAR86;g__;s__
FRAM18_bin217	SAMEA7768544	FRAM18_4502_J	Illumina HiSeq3000	3332833	45	45	36.1	99.89	0.59	0	-	-	-	Medium-quality		d__Bacteria;p__Bacteroidota;c__Bacteroidia;o__Flavobacteriales;f__koll-22;g__UBA1494_A;s__
FRAM18_bin074	SAMEA7768567	FRAM18_4502_E	Illumina HiSeq3000	721846	30103	47	32.42	64.46	0.11	100	-	-	-	Medium-quality		d__Bacteria;p__Proteobacteria;c__Alphaproteobacteria;o__Pelagibacterales;f__AG-422-B15;g__;s__
FRAM18_bin211	SAMEA7768601	FRAM18_4502_F	Illumina HiSeq3000	1556577	61417	48	30.27	82.76	0	0	yes (1518)	-	-	Medium-quality	Bacteria/Bacteroidota/Bacteroidia/Flavobacteriales/Flavobacteriaceae_1/NS2b marine group	d__Bacteria;p__Bacteroidota;c__Bacteroidia;o__Flavobacteriales;f__Flavobacteriaceae;g__;s__
FRAM18_bin053	SAMEA7768528	FRAM18_4502_I	Illumina HiSeq3000	2663310	112507	49	50.48	96.01	0.32	100	-	-	-	Medium-quality		d__Bacteria;p__Proteobacteria;c__Alphaproteobacteria;o__Rhodobacterales;f__Rhodobacteraceae;g__Ascidiaceihabitans;s__
FRAM18_bin043	SAMEA7768540	FRAM18_4502_E	Illumina HiSeq3000	1902557	54866	52	43.81	84.38	0.02	100	-	-	-	Medium-quality		d__Bacteria;p__Proteobacteria;c__Alphaproteobacteria;o__Rhodobacterales;f__Rhodobacteraceae;g__Planktomarina;s__
FRAM18_bin106	SAMEA7768487	FRAM18_4502_E	Illumina HiSeq3000	1759884	52980	52	44.96	83.93	0.8	0	-	-	-	Medium-quality		d__Archaea;p__Thermoplasmatota;c__Poseidoniia;o__Poseidoniales;f__Poseidoniaceae;g__MGIIa-L1;s__
FRAM18_bin143	SAMEA7768594	FRAM18_4502_E	Illumina HiSeq3000	1396439	41357	54	29.74	87.5	0	0	-	-	-	Medium-quality	Bacteria/Bacteroidota/Bacteroidia/Flavobacteriales/Flavobacteriaceae_1/NS4 marine group	d__Bacteria;p__Bacteroidota;c__Bacteroidia;o__Flavobacteriales;f__Flavobacteriaceae;g__MAG-121220-bin8;s__
FRAM18_bin231	SAMEA7768535	FRAM18_4502_J	Illumina HiSeq3000	2206240	72328	54	48.87	91.91	0	0	-	-	-	Medium-quality		d__Bacteria;p__Proteobacteria;c__Gammaproteobacteria;o__Pseudomonadales;f__Porticoccaceae;g__HTCC2207;s__
FRAM18_bin021	SAMEA7768548	FRAM18_4514_D	Illumina HiSeq3000	1903131	64569	56	36.03	90.01	0	0	-	yes (110)	-	Medium-quality		d__Bacteria;p__Proteobacteria;c__Alphaproteobacteria;o__Rhodobacterales;f__Rhodobacteraceae;g__Amylibacter_A;s__
FRAM18_bin118	SAMEA7768499	FRAM18_4514_B	Illumina HiSeq3000	1955656	53879	61	38.77	80.35	0	0	-	-	-	Medium-quality		d__Bacteria;p__Bacteroidota;c__Bacteroidia;o__Cytophagales;f__Cyclobacteriaceae;g__UBA4465;s__UBA4465 sp002470835
FRAM18_bin171	SAMEA7768501	FRAM18_4502_I	Illumina HiSeq3000	1661664	45634	61	35.23	79.15	0.33	0	-	-	-	Medium-quality		d__Bacteria;p__Bacteroidota;c__Bacteroidia;o__Flavobacteriales;f__Flavobacteriaceae;g__Hel1-33-131;s__
FRAM18_bin213	SAMEA7768534	FRAM18_4502_G	Illumina HiSeq3000	1257149	35955	62	35.69	66.55	0	0	-	yes (103)	-	Medium-quality		d__Bacteria;p__Bacteroidota;c__Bacteroidia;o__Flavobacteriales;f__UBA7430;g__UBA6772;s__
FRAM18_bin163	SAMEA7768577	FRAM18_4514_A	Illumina HiSeq3000	1669890	40177	66	32.21	71.92	0.11	0	-	-	-	Medium-quality		d__Bacteria;p__Bacteroidota;c__Bacteroidia;o__Flavobacteriales;f__Flavobacteriaceae;g__SCGC-AAA160-P02;s__SCGC-AAA160-P02 sp000383355
FRAM18_bin046	SAMEA7768494	FRAM18_4502_K	Illumina HiSeq3000	1915321	49409	71	43.79	83.5	0.19	50	yes (911)	-	-	Medium-quality	Bacteria/Proteobacteria/Alphaproteobacteria/Rhodobacterales_Rhodobacteraceae_1/Planktomarina	d__Bacteria;p__Proteobacteria;c__Alphaproteobacteria;o__Rhodobacterales;f__Rhodobacteraceae;g__Planktomarina;s__
FRAM18_bin198	SAMEA7768598	FRAM18_4502_J	Illumina HiSeq3000	2321485	46229	73	32.34	98.66	0	0	yes (1513)	yes (106)	yes (2747)	High-quality draft	Bacteria/Bacteroidota/Bacteroidia/Flavobacteriales/NS9 marine group	d__Bacteria;p__Bacteroidota;c__Bacteroidia;o__Flavobacteriales;f__;g__;s__
FRAM18_bin335	SAMEA7768518	FRAM18_4502_I	Illumina HiSeq3000	2150197	43393	73	58.09	85.54	0	0	-	-	-	Medium-quality		d__Bacteria;p__Verrucomicrobiota;c__Verrucomicrobiae;o__Verrucomicrobiales;f__Akkermansiaceae;g__UBA1315;s__
FRAM18_bin092	SAMEA7768587	FRAM18_4502_H	Illumina HiSeq3000	1514989	33181	74	46.44	67.6	0	0	yes (781)	yes (110)	-	Medium-quality	Archaea/Thermoplasmatota/Thermoplasmata/Marine Group II	d__Archaea;p__Thermoplasmatota;c__Poseidoniia;o__Poseidoniales;f__Thalassoarchaeaceae;g__MGIIb-O3;s__MGIIb-O3 sp002503285
FRAM18_bin263	SAMEA7768512	FRAM18_4514_B	Illumina HiSeq3000	2346893	76982	75	45.22	93.86	0.62	66.67	-	yes x 2 (76)	-	Medium-quality		d__Bacteria;p__Proteobacteria;c__Gammaproteobacteria;o__Pseudomonadales;f__Nitrincolaceae;g__ASP10-02a;s__ASP10-02a sp002335115
FRAM18_bin326	SAMEA7768560	FRAM18_4502_G	Illumina HiSeq3000	1520701	27832	78	52.89	69.59	0	0	yes x 2 (1553)	yes (77)	yes (2892)	Medium-quality	Bacteria/Verrucomicrobiota/Verrucomicrobiae/Opitutales/Puniceicoccaceae/Lentimonas	d__Bacteria;p__Verrucomicrobiota;c__Verrucomicrobiae;o__Opitutales;f__Puniceicoccaceae;g__BACL24;s__
FRAM18_bin012	SAMEA7768547	FRAM18_4502_E	Illumina HiSeq3000	1916056	32930	79	67.63	90.6	2.56	0	yes (692)	-	-	Medium-quality	Bacteria/Actinobacteriota/Acidimicrobiia/Microtrichales/Microtrichaceae/Sva0996 marine group	d__Bacteria;p__Actinobacteriota;c__Acidimicrobiia;o__Microtrichales;f__MedAcidi-G1;g__UBA9410;s__
FRAM18_bin347	SAMEA7768486	FRAM18_4502_H	Illumina HiSeq3000	818455	14689	81	34.22	74.71	1.63	0	-	yes (112)	-	Medium-quality		d__Bacteria;p__Dadabacteria;c__UBA1144;o__UBA1144;f__UBA1144;g__;s__
FRAM18_bin246	SAMEA7768604	FRAM18_4502_J	Illumina HiSeq3000	1680915	34627	84	45.69	87.19	0	0	-	yes (112)	-	Medium-quality		d__Bacteria;p__Proteobacteria;c__Gammaproteobacteria;o__Pseudomonadales;f__Porticoccaceae;g__HTCC2207;s__
FRAM18_bin252	SAMEA7768537	FRAM18_4502_G	Illumina HiSeq3000	2017503	34914	88	46.07	92.07	0.19	100	-	yes (111)	-	Medium-quality		d__Bacteria;p__Proteobacteria;c__Gammaproteobacteria;o__Pseudomonadales;f__Porticoccaceae;g__HTCC2207;s__
FRAM18_bin049	SAMEA7768549	FRAM18_4502_J	Illumina HiSeq3000	2740033	47242	100	51.6	92.73	0.64	50	-	-	-	Medium-quality		d__Bacteria;p__Proteobacteria;c__Alphaproteobacteria;o__Rhodobacterales;f__Rhodobacteraceae;g__Ascidiaceihabitans;s__
FRAM18_bin035	SAMEA7768510	FRAM18_4514_B	Illumina HiSeq3000	3507420	56487	109	52.59	96.51	1.11	0	-	-	-	Medium-quality		d__Bacteria;p__Proteobacteria;c__Alphaproteobacteria;o__Rhodobacterales;f__Rhodobacteraceae;g__HIMB11;s__HIMB11 sp002336405
FRAM18_bin321	SAMEA7768609	FRAM18_4502_K	Illumina HiSeq3000	2179531	34579	109	49.37	80.88	1.28	33.33	yes (474)	-	-	Medium-quality		d__Bacteria;p__Proteobacteria;c__Gammaproteobacteria;o__Pseudomonadales;f__HTCC2089;g__UBA4421;s__
FRAM18_bin097	SAMEA7768588	FRAM18_4514_A	Illumina HiSeq3000	1655995	23358	112	46.42	73.68	0.8	100	-	yes (108)	-	Medium-quality		d__Archaea;p__Thermoplasmatota;c__Poseidoniia;o__Poseidoniales;f__Poseidoniaceae;g__MGIIa-L1;s__
FRAM18_bin259	SAMEA7768506	FRAM18_4514_A	Illumina HiSeq3000	1345144	15474	117	45.22	74.75	0.49	50	-	-	-	Medium-quality		d__Bacteria;p__Proteobacteria;c__Gammaproteobacteria;o__Pseudomonadales;f__Porticoccaceae;g__HTCC2207;s__
FRAM18_bin110	SAMEA7768569	FRAM18_4502_K	Illumina HiSeq3000	1375562	14502	122	44.83	64.39	0	0	-	-	-	Medium-quality		d__Archaea;p__Thermoplasmatota;c__Poseidoniia;o__Poseidoniales;f__Thalassoarchaeaceae;g__MGIIb-O3;s__
FRAM18_bin016	SAMEA7768564	FRAM18_4502_G	Illumina HiSeq3000	1433226	17185	123	30.07	74.24	0.14	0	-	yes (110)	-	Medium-quality		d__Bacteria;p__Proteobacteria;c__Alphaproteobacteria;o__Puniceispirillales;f__AAA536-G10;g__;s__
FRAM18_bin077	SAMEA7768582	FRAM18_4514_D	Illumina HiSeq3000	1862456	21842	123	38.88	90.89	0	0	-	-	-	Medium-quality		d__Bacteria;p__Proteobacteria;c__Alphaproteobacteria;o__Sphingomonadales;f__Emcibacteraceae;g__UBA4441;s__
FRAM18_bin082	SAMEA7768583	FRAM18_4502_E	Illumina HiSeq3000	2450650	29917	123	52.8	72.24	0.43	50	-	-	-	Medium-quality		d__Bacteria;p__Proteobacteria;c__Alphaproteobacteria;o__Defluviicoccales;f__UBA2964;g__GCA-2720855;s__
FRAM18_bin322	SAMEA7768610	FRAM18_4502_K	Illumina HiSeq3000	2830777	35872	125	47.95	88.67	1.02	20	-	-	-	Medium-quality	Bacteria/Proteobacteria/Gammaproteobacteria/KI89A clade	d__Bacteria;p__Proteobacteria;c__Gammaproteobacteria;o__Pseudomonadales;f__HTCC2089;g__UBA4421;s__UBA4421 sp002390555
FRAM18_bin196	SAMEA7768490	FRAM18_4502_K	Illumina HiSeq3000	1733199	19446	131	44.19	83.08	0.54	0	-	-	-	Medium-quality		d__Bacteria;p__Bacteroidota;c__Bacteroidia;o__Flavobacteriales;f__UBA10066;g__MED-G20;s__
FRAM18_bin210	SAMEA7768511	FRAM18_4514_D	Illumina HiSeq3000	1278202	13281	131	33.45	66.18	1.6	9.09	-	-	-	Medium-quality		d__Bacteria;p__Bacteroidota;c__Bacteroidia;o__Flavobacteriales;f__Flavobacteriaceae;g__MS024-2A;s__
FRAM18_bin084	SAMEA7768514	FRAM18_4502_E	Illumina HiSeq3000	1702895	18634	140	38.38	65.66	1.01	87.5	-	-	-	Medium-quality		d__Bacteria;p__Proteobacteria;c__Alphaproteobacteria;o__Rhodobacterales;f__Rhodobacteraceae;g__GCA-2697345;s__
FRAM18_bin328	SAMEA7768561	FRAM18_4502_B	Illumina HiSeq3000	3378014	35507	144	55.44	97.2	0	0	-	-	-	Medium-quality		d__Bacteria;p__Verrucomicrobiota;c__Verrucomicrobiae;o__Verrucomicrobiales;f__Akkermansiaceae;g__UBA1315;s__
FRAM18_bin085	SAMEA7768584	FRAM18_4502_J	Illumina HiSeq3000	3107017	33288	150	55.95	93.43	0.61	50	-	yes (110)	-	Medium-quality		d__Bacteria;p__Proteobacteria;c__Alphaproteobacteria;o__Rhodobacterales;f__Rhodobacteraceae;g__Octadecabacter;s__Octadecabacter arcticus
FRAM18_bin348	SAMEA7768563	FRAM18_4514_C	Illumina HiSeq3000	1381629	11831	154	32.14	73.63	1.2	0	yes (1560)	-	-	Medium-quality	Bacteria/Marinimicrobia (SAR406 clade)	d__Bacteria;p__Marinisomatota;c__Marinisomatia;o__Marinisomatales;f__TCS55;g__TCS55;s__
FRAM18_bin009	SAMEA7768480	FRAM18_4514_A	Illumina HiSeq3000	1233055	8886	164	53.78	65.87	0.12	100	yes (1521)	yes (111)	yes (3106)	Medium-quality	Bacteria/Actinobacteriota/Actinobacteria/PeM15	d__Bacteria;p__Actinobacteriota;c__Actinobacteria;o__Nanopelagicales;f__S36-B12;g__UBA4592;s__
FRAM18_bin122	SAMEA7768590	FRAM18_4514_B	Illumina HiSeq3000	2277429	20528	166	38.61	78.18	1.24	66.67	-	-	-	Medium-quality		d__Bacteria;p__Bacteroidota;c__Bacteroidia;o__Cytophagales;f__Cyclobacteriaceae;g__UBA4465;s__
FRAM18_bin083	SAMEA7768475	FRAM18_4502_E	Illumina HiSeq3000	3127873	26418	177	59.35	87.39	0.87	0	yes (1497)	-	yes (2125)	Medium-quality	Bacteria/Proteobacteria/Alphaproteobacteria/Rhodospirillales_Magnetospiraceae/uncultured	d__Bacteria;p__Proteobacteria;c__Alphaproteobacteria;o__Defluviicoccales;f__UBA830;g__GCA-2689465;s__
FRAM18_bin232	SAMEA7768536	FRAM18_4514_B	Illumina HiSeq3000	1421908	9442	206	48.98	68.41	0	0	-	-	-	Medium-quality		d__Bacteria;p__Proteobacteria;c__Gammaproteobacteria;o__Pseudomonadales;f__Porticoccaceae;g__HTCC2207;s__
FRAM18_bin315	SAMEA7768607	FRAM18_4502_E	Illumina HiSeq3000	1634237	9836	207	37.25	85.98	1.38	16.67	-	-	-	Medium-quality		d__Bacteria;p__Proteobacteria;c__Gammaproteobacteria;o__UBA4486;f__UBA4486;g__UBA7359;s__
FRAM18_bin320	SAMEA7768545	FRAM18_4502_J	Illumina HiSeq3000	2572028	16703	216	48.23	77.25	2.21	20	yes (1529)	-	-	Medium-quality	Bacteria/Proteobacteria/Gammaproteobacteria/KI89A clade	d__Bacteria;p__Proteobacteria;c__Gammaproteobacteria;o__Pseudomonadales;f__HTCC2089;g__UBA4421;s__
FRAM18_bin288	SAMEA7768525	FRAM18_4514_D	Illumina HiSeq3000	2060576	13747	218	53.89	83.18	0	0	-	-	-	Medium-quality		d__Bacteria;p__Proteobacteria;c__Gammaproteobacteria;o__Pseudomonadales;f__Porticoccaceae;g__TMED48;s__
FRAM18_bin126	SAMEA7768592	FRAM18_4502_F	Illumina HiSeq3000	1641931	8228	248	41.97	88.89	1.97	40	-	-	-	Medium-quality		d__Bacteria;p__Bacteroidota;c__Bacteroidia;o__Flavobacteriales;f__Cryomorphaceae;g__UBA10364;s__
FRAM18_bin349	SAMEA7768613	FRAM18_4502_H	Illumina HiSeq3000	1794389	5683	336	36.96	79.72	3.11	14.29	-	yes (98)	-	Medium-quality		d__Bacteria;p__Nitrospinota;c__Nitrospinia;o__Nitrospinales;f__Nitrospinaceae;g__SCGCAAA288-L16;s__
FRAM18_bin151	SAMEA7768515	FRAM18_4571_K	PacBio Sequel II	1232256	1110402	2	29.97	86.15	0	0	yes (1520)	yes (103)	yes (2813)	Medium-quality	Bacteria/Bacteroidota/Bacteroidia/Flavobacteriales/Flavobacteriaceae_1/NS5 marine group	d__Bacteria;p__Bacteroidota;c__Bacteroidia;o__Flavobacteriales;f__Flavobacteriaceae;g__MED-G11;s__
FRAM18_bin297	SAMEA7768493	FRAM18_4571_I	PacBio Sequel II	1414623	1188767	2	38.02	70.6	0.02	0	yes (1531)	yes (110)	yes (2888)	Medium-quality	Bacteria/Proteobacteria/Gammaproteobacteria/SAR86 clade	d__Bacteria;p__Proteobacteria;c__Gammaproteobacteria;o__SAR86;f__D2472;g__D2472;s__
FRAM18_bin317	SAMEA7768509	FRAM18_4571_H	PacBio Sequel II	1107123	1017602	2	33.78	59.57	0.92	0	yes (1537)	-	yes (2883)	Medium-quality	Bacteria/Proteobacteria/Gammaproteobacteria/Burkholderiales/Methylophilaceae/OM43 clade	d__Bacteria;p__Proteobacteria;c__Gammaproteobacteria;o__Burkholderiales;f__Methylophilaceae;g__BACL14;s__
FRAM18_bin339	SAMEA7768543	FRAM18_4571_K	PacBio Sequel II	4361848	2309316	2	53.39	97.28	1.7	0	yes x 2 (1541)	yes x 2 (111)	yes x 2 (2823)	High-quality draft	Bacteria/Verrucomicrobiota/Verrucomicrobiae/Verrucomicrobiales/Rubritaleaceae/Roseibacillus	d__Bacteria;p__Verrucomicrobiota;c__Verrucomicrobiae;o__Verrucomicrobiales;f__Akkermansiaceae;g__;s__
FRAM18_bin086	SAMEA7768585	FRAM18_4571_K	PacBio Sequel II	1101874	627606	3	37.59	54.05	0	0	yes x 2 (1462)	yes x 2 (110)	yes x 2 (2820)	Medium-quality	Bacteria/Proteobacteria/Alphaproteobacteria/Rhodobacterales_Rhodobacteraceae_1/Amylibacter	d__Bacteria;p__Proteobacteria;c__Alphaproteobacteria;o__Rhodobacterales;f__Rhodobacteraceae;g__Amylibacter_A;s__Amylibacter_A sp000153745
FRAM18_bin088	SAMEA7768541	FRAM18_4571_K	PacBio Sequel II	1215540	676700	3	29.08	91.71	5.45	30.77	-	yes (110)	-	Medium-quality		d__Bacteria;p__Proteobacteria;c__Alphaproteobacteria;o__Pelagibacterales;f__Pelagibacteraceae;g__Pelagibacter;s__
FRAM18_bin228	SAMEA7768505	FRAM18_4571_K	PacBio Sequel II	1504707	918716	3	40.51	94.75	0.72	33.33	yes x 2 (1535)	yes x 2 (110)	yes x 2 (2894)	High-quality draft	Bacteria/Proteobacteria/Gammaproteobacteria/Nitrosococcales_Methylophagaceae/uncultured	d__Bacteria;p__Proteobacteria;c__Gammaproteobacteria;o__Nitrosococcales;f__Methylophagaceae;g__;s__
FRAM18_bin311	SAMEA7768485	FRAM18_4571_H	PacBio Sequel II	1325550	859265	3	33.95	53.46	0.32	0	yes (1531)	yes (109)	yes (2883)	Medium-quality	Bacteria/Proteobacteria/Gammaproteobacteria/SAR86 clade	d__Bacteria;p__Proteobacteria;c__Gammaproteobacteria;o__SAR86;f__D2472;g__;s__
FRAM18_bin313	SAMEA7768606	FRAM18_4571_H	PacBio Sequel II	1049886	695784	3	35	61.24	0	0	yes (1531)	yes (109)	yes (2883)	Medium-quality	Bacteria/Proteobacteria/Gammaproteobacteria/SAR86 clade	d__Bacteria;p__Proteobacteria;c__Gammaproteobacteria;o__SAR86;f__D2472;g__SCGC-AAA076-P13;s__
FRAM18_bin019	SAMEA7768520	FRAM18_4571_I	PacBio Sequel II	2385254	653907	4	39	95.47	0.14	0	yes x 2 (1463)	yes x 2 (110)	yes x 2 (2821)	High-quality draft	Bacteria/Proteobacteria/Alphaproteobacteria/Rhodobacterales_Rhodobacteraceae_1/Amylibacter	d__Bacteria;p__Proteobacteria;c__Alphaproteobacteria;o__Rhodobacterales;f__Rhodobacteraceae;g__Amylibacter_A;s__
FRAM18_bin170	SAMEA7768533	FRAM18_4571_K	PacBio Sequel II	1724466	445333	4	35.2	75.26	0.72	0	-	-	-	Medium-quality		d__Bacteria;p__Bacteroidota;c__Bacteroidia;o__Flavobacteriales;f__Flavobacteriaceae;g__Hel1-33-131;s__
FRAM18_bin219	SAMEA7768492	FRAM18_4571_K	PacBio Sequel II	1838957	619334	4	30	88.36	0.18	0	yes (1524)	yes (102)	yes (2779)	Medium-quality	Bacteria/Bacteroidota/Bacteroidia/Flavobacteriales/Flavobacteriaceae_1/NS4 marine group	d__Bacteria;p__Bacteroidota;c__Bacteroidia;o__Flavobacteriales;f__Flavobacteriaceae;g__MAG-121220-bin8;s__
FRAM18_bin301	SAMEA7768605	FRAM18_4571_K	PacBio Sequel II	1322576	748052	4	36.75	69.69	0.33	0	-	-	-	Medium-quality		d__Bacteria;p__Proteobacteria;c__Gammaproteobacteria;o__Thiomicrospirales;f__Thioglobaceae;g__Thioglobus;s__
FRAM18_bin343	SAMEA7768611	FRAM18_4571_H	PacBio Sequel II	3226686	862623	5	40.92	86.62	0	0	yes x 2 (1515)	-	-	Medium-quality	Bacteria/Proteobacteria/Alphaproteobacteria/AT-s3-44	d__Bacteria;p__SAR324;c__SAR324;o__SAR324;f__NAC60-12;g__Arctic96AD-7;s__
FRAM18_bin114	SAMEA7768498	FRAM18_4571_I	PacBio Sequel II	2588780	495933	6	36.2	88.71	0.54	100	yes x 2 (1518)	yes x 2 (106)	yes x 2 (2869)	Medium-quality	Bacteria/Bacteroidota/Bacteroidia/Flavobacteriales/Cryomorphaceae_3/uncultured	d__Bacteria;p__Bacteroidota;c__Bacteroidia;o__Flavobacteriales;f__1G12;g__UBA6770;s__
FRAM18_bin205	SAMEA7768502	FRAM18_4571_I	PacBio Sequel II	3420398	790964	6	33.96	96.59	1.78	0	yes x 3 (1514)	yes x 3 (105)	yes x 3 (2869)	High-quality draft	Bacteria/Bacteroidota/Bacteroidia/Flavobacteriales/Flavobacteriaceae_1/uncultured	d__Bacteria;p__Bacteroidota;c__Bacteroidia;o__Flavobacteriales;f__Flavobacteriaceae;g__LPB0138;s__
FRAM18_bin223	SAMEA7768571	FRAM18_4571_K	PacBio Sequel II	2189600	431542	6	30.19	92.47	0	0	yes (1520)	yes (106)	yes (2853)	High-quality draft	Bacteria/Bacteroidota/Bacteroidia/Flavobacteriales/NS7 marine group	d__Bacteria;p__Bacteroidota;c__Bacteroidia;o__Flavobacteriales;f__Cryomorphaceae;g__UBA10364;s__UBA10364 sp002387615
FRAM18_bin325	SAMEA7768488	FRAM18_4571_K	PacBio Sequel II	795014	166418	6	34.68	57.43	0.44	0	yes (1537)	-	-	Medium-quality	Bacteria/Proteobacteria/Gammaproteobacteria/Burkholderiales/Methylophilaceae/OM43 clade	d__Bacteria;p__Proteobacteria;c__Gammaproteobacteria;o__Burkholderiales;f__Methylophilaceae;g__BACL14;s__
FRAM18_bin340	SAMEA7768562	FRAM18_4571_K	PacBio Sequel II	1725881	335522	6	51.09	95.95	0.68	0	yes (1552)	-	yes (2890)	High-quality draft	Bacteria/Verrucomicrobiota/Verrucomicrobiae/Opitutales/Puniceicoccaceae/Lentimonas	d__Bacteria;p__Verrucomicrobiota;c__Verrucomicrobiae;o__Opitutales;f__Puniceicoccaceae;g__BACL24;s__
FRAM18_bin059	SAMEA7768495	FRAM18_4571_K	PacBio Sequel II	2543870	680942	7	52.52	96.06	0.25	0	yes x 2 (1461)	yes x 2 (110)	yes x 2 (2901)	High-quality draft	Bacteria/Proteobacteria/Alphaproteobacteria/Rhodobacterales_Rhodobacteraceae_1/Planktomarina	d__Bacteria;p__Proteobacteria;c__Alphaproteobacteria;o__Rhodobacterales;f__Rhodobacteraceae;g__Planktomarina;s__
FRAM18_bin137	SAMEA7768593	FRAM18_4571_H	PacBio Sequel II	1890234	348639	7	36.88	81.32	0	0	yes (1516)	yes (104)	yes (2805)	Medium-quality	Bacteria/Bacteroidota/Bacteroidia/Flavobacteriales/Flavobacteriaceae_1/Ulvibacter_2	d__Bacteria;p__Bacteroidota;c__Bacteroidia;o__Flavobacteriales;f__Flavobacteriaceae;g__HC6-5;s__
FRAM18_bin189	SAMEA7768542	FRAM18_4571_I	PacBio Sequel II	1043033	251299	7	31.53	52.69	2.15	100	yes (1517)	yes (107)	yes (2881)	Medium-quality	Bacteria/Bacteroidota/Bacteroidia/Flavobacteriales/NS9 marine group	d__Bacteria;p__Bacteroidota;c__Bacteroidia;o__Flavobacteriales;f__BACL11;g__GCA-2705205;s__
FRAM18_bin200	SAMEA7768555	FRAM18_4571_I	PacBio Sequel II	2377754	343515	7	35.33	98.92	0	0	yes x 2 (1521)	yes x 2 (102)	yes x 2 (2866)	High-quality draft	Bacteria/Bacteroidota/Bacteroidia/Flavobacteriales/Crocinitomicaceae/Fluviicola	d__Bacteria;p__Bacteroidota;c__Bacteroidia;o__Flavobacteriales;f__Crocinitomicaceae;g__UBA4466;s__
FRAM18_bin222	SAMEA7768484	FRAM18_4571_K	PacBio Sequel II	1354998	246102	7	38.54	62.87	0	0	yes (1522)	yes (104)	yes (2816)	Medium-quality	Bacteria/Bacteroidota/Bacteroidia/Flavobacteriales/Flavobacteriaceae_1/NS5 marine group	d__Bacteria;p__Bacteroidota;c__Bacteroidia;o__Flavobacteriales;f__Flavobacteriaceae;g__UBA7428;s__UBA7428 sp002477625
FRAM18_bin101	SAMEA7768497	FRAM18_4571_K	PacBio Sequel II	2065226	303153	8	51.95	83.2	0	0	-	yes (110)	-	Medium-quality		d__Archaea;p__Thermoplasmatota;c__Poseidoniia;o__Poseidoniales;f__Poseidoniaceae;g__MGIIa-L1;s__
FRAM18_bin188	SAMEA7768478	FRAM18_4571_I	PacBio Sequel II	1090891	342824	8	31.84	63.71	0.27	0	yes (1517)	-	-	Medium-quality	Bacteria/Bacteroidota/Bacteroidia/Flavobacteriales/NS9 marine group	d__Bacteria;p__Bacteroidota;c__Bacteroidia;o__Flavobacteriales;f__BACL11;g__GCA-2705205;s__
FRAM18_bin221	SAMEA7768504	FRAM18_4571_K	PacBio Sequel II	2304439	606340	8	32.68	94.11	1.9	28.57	yes x 2 (1522)	yes (103)	yes x 2 (2809)	High-quality draft	Bacteria/Bacteroidota/Bacteroidia/Flavobacteriales/Flavobacteriaceae_1/uncultured	d__Bacteria;p__Bacteroidota;c__Bacteroidia;o__Flavobacteriales;f__Flavobacteriaceae;g__GCA-002733185;s__
FRAM18_bin168	SAMEA7768489	FRAM18_4571_K	PacBio Sequel II	1941399	249164	9	31.47	78.64	0.84	25	yes (1514)	yes (103)	yes (2871)	Medium-quality	Bacteria/Bacteroidota/Bacteroidia/Flavobacteriales/Flavobacteriaceae_1/Polaribacter	d__Bacteria;p__Bacteroidota;c__Bacteroidia;o__Flavobacteriales;f__UBA7430;g__UBA6772;s__UBA6772 sp002685115
FRAM18_bin220	SAMEA7768483	FRAM18_4571_K	PacBio Sequel II	1721132	264739	9	29.37	91.84	0.54	0	yes (1519)	ys (106)	yes (2880)	High-quality draft	Bacteria/Bacteroidota/Bacteroidia/Flavobacteriales/NS9 marine group	d__Bacteria;p__Bacteroidota;c__Bacteroidia;o__Flavobacteriales;f__BACL11;g__;s__
FRAM18_bin091	SAMEA7768496	FRAM18_4571_K	PacBio Sequel II	1069686	122597	10	31.61	56.11	0	0	-	-	-	Medium-quality		d__Bacteria;p__Proteobacteria;c__Alphaproteobacteria;o__Rhodobacterales;f__Rhodobacteraceae;g__Planktomarina;s__
FRAM18_bin117	SAMEA7768482	FRAM18_4571_I	PacBio Sequel II	1744009	214991	10	30.8	93.01	1.61	100	yes (1518)	yes (106)	yes (2879)	High-quality draft	Bacteria/Bacteroidota/Bacteroidia/Flavobacteriales/NS9 marine group	d__Bacteria;p__Bacteroidota;c__Bacteroidia;o__Flavobacteriales;f__BACL11;g__GCA-002697625;s__
FRAM18_bin141	SAMEA7768476	FRAM18_4571_I	PacBio Sequel II	1863534	442940	10	30.33	97.79	0	0	yes (1525)	yes (102)	yes (2778)	High-quality draft	Bacteria/Bacteroidota/Bacteroidia/Flavobacteriales/Flavobacteriaceae_1/NS4 marine group	d__Bacteria;p__Bacteroidota;c__Bacteroidia;o__Flavobacteriales;f__Flavobacteriaceae;g__MAG-121220-bin8;s__
FRAM18_bin237	SAMEA7768603	FRAM18_4571_H	PacBio Sequel II	2476915	847194	10	48.89	96.3	0.74	100	yes (1529)	yes (112)	yes (2897)	High-quality draft	Bacteria/Proteobacteria/Gammaproteobacteria/Cellvibrionales/Porticoccaceae/SAR92 clade	d__Bacteria;p__Proteobacteria;c__Gammaproteobacteria;o__Pseudomonadales;f__Porticoccaceae;g__HTCC2207;s__
FRAM18_bin061	SAMEA7768566	FRAM18_4571_I	PacBio Sequel II	2120970	320948	11	52.26	86.03	0	0	yes x 2 (1461)	yes x 2 (110)	yes x 2 (2818)	Medium-quality	Bacteria/Proteobacteria/Alphaproteobacteria/Rhodobacterales_Rhodobacteraceae_1/Planktomarina	d__Bacteria;p__Proteobacteria;c__Alphaproteobacteria;o__Rhodobacterales;f__Rhodobacteraceae;g__Planktomarina;s__
FRAM18_bin104	SAMEA7768589	FRAM18_4571_K	PacBio Sequel II	1194721	107896	11	35.92	54.53	0.8	100	yes (1463)	-	-	Medium-quality	Archaea/Thermoplasmatota/Thermoplasmata/Marine Group II	d__Archaea;p__Thermoplasmatota;c__Poseidoniia;o__Poseidoniales;f__Poseidoniaceae;g__MGIIa-L1;s__
FRAM18_bin108	SAMEA7768531	FRAM18_4571_I	PacBio Sequel II	1545575	186523	11	42.44	55.73	0.8	100	yes (1460)	-	-	Medium-quality	Archaea/Thermoplasmatota/Thermoplasmata/Marine Group II	d__Archaea;p__Thermoplasmatota;c__Poseidoniia;o__Poseidoniales;f__Poseidoniaceae;g__MGIIa-K2;s__
FRAM18_bin161	SAMEA7768553	FRAM18_4571_I	PacBio Sequel II	1858828	221399	11	33.54	91.54	0	0	yes (1525)	yes (105)	yes (2809)	High-quality draft	Bacteria/Bacteroidota/Bacteroidia/Flavobacteriales/Flavobacteriaceae_1/NS5 marine group	d__Bacteria;p__Bacteroidota;c__Bacteroidia;o__Flavobacteriales;f__Flavobacteriaceae;g__MS024-2A;s__sp000173095
FRAM18_bin090	SAMEA7768530	FRAM18_4571_K	PacBio Sequel II	2623753	308588	12	47.91	94.25	0.2	0	yes x 2 (1461)	yes (110)	yes (2818)	High-quality draft	Bacteria/Proteobacteria/Alphaproteobacteria/Rhodobacterales_Rhodobacteraceae_1/Planktomarina	d__Bacteria;p__Proteobacteria;c__Alphaproteobacteria;o__Puniceispirillales;f__Puniceispirillaceae;g__UBA4588;s__UBA4588 sp002387605
FRAM18_bin087	SAMEA7768576	FRAM18_4571_K	PacBio Sequel II	2006995	221049	13	49.78	95.63	0	15.38	yes (1482)	yes (110)	yes (2716)	High-quality draft	Bacteria/Proteobacteria/Alphaproteobacteria/Puniceispirillales/SAR116 clade	d__Bacteria;p__Proteobacteria;c__Alphaproteobacteria;o__Puniceispirillales;f__Puniceispirillaceae;g__Puniceispirillum;s__
FRAM18_bin031	SAMEA7768527	FRAM18_4571_H	PacBio Sequel II	2021067	222011	14	37.3	72.48	0.1	0	yes (1462)	yes (110)	yes (2818)	Medium-quality	Bacteria/Proteobacteria/Alphaproteobacteria/Rhodobacterales_Rhodobacteraceae_1	d__Bacteria;p__Proteobacteria;c__Alphaproteobacteria;o__Rhodobacterales;f__Rhodobacteraceae;g__GCA-002712045;s__
FRAM18_bin125	SAMEA7768591	FRAM18_4571_K	PacBio Sequel II	2008008	204138	14	44.16	94.89	0.54	0	yes (1519)	yes (102)	yes (2855)	High-quality draft	Bacteria/Bacteroidota/Bacteroidia/Flavobacteriales/Flavobacteriaceae_1/Polaribacter	d__Bacteria;p__Bacteroidota;c__Bacteroidia;o__Flavobacteriales;f__Flavobacteriaceae;g__Polaribacter;s__
FRAM18_bin323	SAMEA7768517	FRAM18_4571_K	PacBio Sequel II	850050	93138	14	34.45	54.43	1.23	50	yes (1531)	-	-	Medium-quality	Bacteria/Proteobacteria/Gammaproteobacteria/SAR86 clade	d__Bacteria;p__Proteobacteria;c__Gammaproteobacteria;o__SAR86;f__D2472;g__SCGC-AAA076-P13;s__SCGC-AAA076-P13 sp000384935
FRAM18_bin033	SAMEA7768581	FRAM18_4571_I	PacBio Sequel II	2674666	232856	15	54.11	91.43	0.25	0	yes x 3 (1465)	yes x 3 (110)	yes x 3 (2822)	High-quality draft	Bacteria/Proteobacteria/Alphaproteobacteria/Rhodobacterales_Rhodobacteraceae_1/Sulfitobacter_1	d__Bacteria;p__Proteobacteria;c__Alphaproteobacteria;o__Rhodobacterales;f__Rhodobacteraceae;g__UBA3435;s__
FRAM18_bin283	SAMEA7768524	FRAM18_4571_K	PacBio Sequel II	2733765	250088	15	52.49	94.74	0.74	25	yes x 2 (1534)	yes x 2 (110)	yes x 2 (2893)	High-quality draft	Bacteria/Proteobacteria/Gammaproteobacteria/Oceanospirillales_11_Pseudohongiellaceae/Pseudohongiella	d__Bacteria;p__Proteobacteria;c__Gammaproteobacteria;o__Pseudomonadales;f__Pseudohongiellaceae;g__OM182;s__OM182 sp001438145
FRAM18_bin318	SAMEA7768572	FRAM18_4571_H	PacBio Sequel II	2393381	184904	16	47.91	77.16	0.44	33.33	yes x 2 (1461)	yes (110)	yes (2818)	Medium-quality	Bacteria/Proteobacteria/Alphaproteobacteria/Rhodobacterales_Rhodobacteraceae_1/Planktomarina	d__Bacteria;p__Proteobacteria;c__Alphaproteobacteria;o__Rhodobacterales;f__Rhodobacteraceae;g__Planktomarina;s__
FRAM18_bin195	SAMEA7768597	FRAM18_4571_K	PacBio Sequel II	1246563	79967	18	31.66	57.77	1.61	83.33	-	-	-	Medium-quality		d__Bacteria;p__Bacteroidota;c__Bacteroidia;o__Flavobacteriales;f__UBA10066;g__MED-G20;s__
FRAM18_bin008	SAMEA7768479	FRAM18_4571_H	PacBio Sequel II	2721729	170275	19	47.54	93.94	4.37	42.86	yes (1512)	yes (109)	yes (2941)	High-quality draft	Bacteria/Actinobacteriota/Acidimicrobiia/Microtrichales/Ilumatobacteraceae/Ilumatobacter	d__Bacteria;p__Actinobacteriota;c__Acidimicrobiia;o__Microtrichales;f__TK06;g__UBA9040;s__
FRAM18_bin207	SAMEA7768556	FRAM18_4571_H	PacBio Sequel II	1390843	101701	19	31.56	58.65	0.73	33.33	yes (1520)	yes (103)	yes (2811)	Medium-quality		d__Bacteria;p__Bacteroidota;c__Bacteroidia;o__Flavobacteriales;f__Flavobacteriaceae;g__GCA-002733185;s__
FRAM18_bin121	SAMEA7768552	FRAM18_4571_K	PacBio Sequel II	2671452	227336	20	38.44	88.32	0.65	66.67	yes x 2 (1518)	yes x 2 (107)	yes x 2 (2862)	Medium-quality	Bacteria/Bacteroidota/Bacteroidia/Flavobacteriales/Cryomorphaceae_3/uncultured	d__Bacteria;p__Bacteroidota;c__Bacteroidia;o__Cytophagales;f__Cyclobacteriaceae;g__UBA4465;s__
FRAM18_bin208	SAMEA7768600	FRAM18_4571_I	PacBio Sequel II	2373187	191072	20	31.47	85.93	9	93.02	yes x 2 (1520)	yes x 2 (103)	yes x 2 (2811)	Medium-quality	Bacteria/Bacteroidota/Bacteroidia/Flavobacteriales/Flavobacteriaceae_1/uncultured	d__Bacteria;p__Bacteroidota;c__Bacteroidia;o__Flavobacteriales;f__Flavobacteriaceae;g__GCA-002733185;s__
FRAM18_bin341	SAMEA7768519	FRAM18_4571_K	PacBio Sequel II	2637992	188718	24	49.78	55.75	0.14	100	yes (1539)	yes (111)	yes (2816)	Medium-quality	Bacteria/Verrucomicrobiota/Verrucomicrobiae/Verrucomicrobiales/Rubritaleaceae/Roseibacillus	d__Bacteria;p__Verrucomicrobiota;c__Verrucomicrobiae;o__Verrucomicrobiales;f__Akkermansiaceae;g__SW10;s__
FRAM18_bin014	SAMEA7768580	FRAM18_4571_K	PacBio Sequel II	2558616	132202	26	62.03	69.52	1.28	0	yes (1517)	yes (110)	yes (3059)	Medium-quality	Bacteria/Actinobacteriota/Acidimicrobiia/Microtrichales/Ilumatobacteraceae/Ilumatobacter	d__Bacteria;p__Actinobacteriota;c__Acidimicrobiia;o__Microtrichales;f__Ilumatobacteraceae;g__Ilumatobacter;s__
FRAM18_bin057	SAMEA7768565	FRAM18_4571_H	PacBio Sequel II	2429319	101317	27	45.79	84.93	0.3	0	yes x 2 (1369)	yes (110)	yes (2821)	Medium-quality	Bacteria/Proteobacteria/Alphaproteobacteria/Rhodobacterales_Rhodobacteraceae_1/Planktomarina	d__Bacteria;p__Proteobacteria;c__Alphaproteobacteria;o__Rhodobacterales;f__Rhodobacteraceae;g__Planktomarina;s__
FRAM18_bin194	SAMEA7768570	FRAM18_4571_K	PacBio Sequel II	2475934	105635	27	37.68	90.54	0.54	100	-	-	-	Medium-quality		d__Bacteria;p__Bacteroidota;c__Bacteroidia;o__Flavobacteriales;f__Crocinitomicaceae;g__UBA952;s__
FRAM18_bin218	SAMEA7768602	FRAM18_4571_K	PacBio Sequel II	1654917	62159	27	37.76	54.37	0.54	100	yes (1519)	yes (104)	yes (2772)	Medium-quality	Bacteria/Bacteroidota/Bacteroidia/Flavobacteriales/NS9 marine group	d__Bacteria;p__Bacteroidota;c__Bacteroidia;o__Flavobacteriales;f__UA16;g__ASP10-05a;s__
FRAM18_bin319	SAMEA7768608	FRAM18_4571_I	PacBio Sequel II	1468176	58864	28	51.2	56.39	2.26	68.75	yes (1551)	yes (107)	yes (2886)	Medium-quality	Bacteria/Proteobacteria/Gammaproteobacteria/Steroidobacterales_Woeseiaceae/Woeseia	d__Bacteria;p__Proteobacteria;c__Gammaproteobacteria;o__GCA-2729495;f__GCA-2729495;g__;s__
FRAM18_bin181	SAMEA7768477	FRAM18_4571_K	PacBio Sequel II	2187630	417828	29	24.98	93.9	0	0	yes x 2 (1523)	yes x 2 (104)	yes x 2 (2820)	High-quality draft	Bacteria/Bacteroidota/Bacteroidia/Flavobacteriales/Flavobacteriaceae_1/NS5 marine group	d__Bacteria;p__Bacteroidota;c__Bacteroidia;o__Flavobacteriales;f__Flavobacteriaceae;g__UBA7428;s__
FRAM18_bin214	SAMEA7768579	FRAM18_4571_H	PacBio Sequel II	1972826	95107	29	36.04	85.93	0	0	yes x 2 (1525)	yes x 2 (104)	yes x 2 (2817)	Medium-quality	Bacteria/Bacteroidota/Bacteroidia/Flavobacteriales/Flavobacteriaceae_1/NS5 marine group	d__Bacteria;p__Bacteroidota;c__Bacteroidia;o__Flavobacteriales;f__Flavobacteriaceae;g__;s__
FRAM18_bin215	SAMEA7768491	FRAM18_4571_I	PacBio Sequel II	1641624	60627	29	38.07	61.69	1.43	100	-	-	-	Medium-quality		d__Bacteria;p__Bacteroidota;c__Bacteroidia;o__NS11-12g;f__UBA9320;g__UBA9320;s__
FRAM18_bin109	SAMEA7768532	FRAM18_4571_I	PacBio Sequel II	1845911	69740	31	51.22	70.4	2.93	80	yes (1497)	-	-	Medium-quality	Archaea/Thermoplasmatota/Thermoplasmata/Marine Group II	d__Archaea;p__Thermoplasmatota;c__Poseidoniia;o__Poseidoniales;f__Thalassoarchaeaceae;g__MGIIb-O3;s__
FRAM18_bin089	SAMEA7768586	FRAM18_4571_K	PacBio Sequel II	1645427	59908	33	48.83	84.92	1.27	100	yes (1482)	yes (110)	yes (2717)	Medium-quality	Bacteria/Proteobacteria/Alphaproteobacteria/Puniceispirillales/SAR116 clade	d__Bacteria;p__Proteobacteria;c__Alphaproteobacteria;o__Rhodobacterales;f__Rhodobacteraceae;g__Planktomarina;s__
FRAM18_bin100	SAMEA7768574	FRAM18_4571_I	PacBio Sequel II	1775344	58382	36	46.33	70.87	1.6	100	-	-	-	Medium-quality		d__Archaea;p__Thermoplasmatota;c__Poseidoniia;o__Poseidoniales;f__Poseidoniaceae;g__MGIIa-L1;s__
FRAM18_bin063	SAMEA7768521	FRAM18_4571_K	PacBio Sequel II	2363543	75152	38	47.9	83.54	1.51	100	yes (1461)	yes (110)	-	Medium-quality	Bacteria/Proteobacteria/Alphaproteobacteria/Rhodobacterales_Rhodobacteraceae_1/Planktomarina	d__Bacteria;p__Proteobacteria;c__Alphaproteobacteria;o__Puniceispirillales;f__AAA536-G10;g__AAA536-G10;s__
FRAM18_bin324	SAMEA7768559	FRAM18_4571_K	PacBio Sequel II	2174626	53233	42	54.65	67.4	1.68	80	-	yes (109)	yes (2880)	Medium-quality		d__Bacteria;p__Proteobacteria;c__Gammaproteobacteria;o__Pseudomonadales;f__Halieaceae;g__Luminiphilus;s__
FRAM18_bin290	SAMEA7768507	FRAM18_4571_H	PacBio Sequel II	2574152	65752	47	52.53	72.1	0.8	60	yes (1529)	yes (111)	yes (2913)	Medium-quality	Bacteria/Proteobacteria/Gammaproteobacteria/Cellvibrionales/Halieaceae/OM60(NOR5) clade	d__Bacteria;p__Proteobacteria;c__Gammaproteobacteria;o__Pseudomonadales;f__Halieaceae;g__Halioglobus;s__
FRAM18_bin287	SAMEA7768538	FRAM18_4571_H	PacBio Sequel II	2298337	47506	49	53.03	71.2	0.31	50	yes (1540)	yes (110)	yes (2897)	Medium-quality	Bacteria/Proteobacteria/Gammaproteobacteria/OM182 clade	d__Bacteria;p__Proteobacteria;c__Gammaproteobacteria;o__Pseudomonadales;f__HTCC2089;g__UBA9926;s__
FRAM18_bin281	SAMEA7768523	FRAM18_4571_I	PacBio Sequel II	3108524	68301	54	47.76	84.07	3.33	0	yes x 2 (1539)	yes x 2 (108)	yes x 2 (2908)	Medium-quality	Bacteria/Proteobacteria/Gammaproteobacteria/OM182 clade	d__Bacteria;p__Proteobacteria;c__Gammaproteobacteria;o__Pseudomonadales;f__HTCC2089;g__GCA-2725285;s__
FRAM18_bin190	SAMEA7768596	FRAM18_4571_K	PacBio Sequel II	1950751	14372	178	38.01	80.37	0.54	0	yes (1517)	-	-	Medium-quality		d__Bacteria;p__Bacteroidota;c__Bacteroidia;o__Flavobacteriales;f__Crocinitomicaceae;g__UBA952;s__

## Sheet: Supplementary_table_S3
Supplementary Table S3. Relative abundance of species representative MAGs across the illumina metagenomes. Relative abundance was determined by mapping raw reads to MAGs with bbmap at a 99% identity threshold
MAG	FRAM18_4514_A	FRAM18_4514_B	FRAM18_4514_C	FRAM18_4514_D	FRAM18_4502_E	FRAM18_4502_F	FRAM18_4502_G	FRAM18_4502_H	FRAM18_4502_I	FRAM18_4502_J	FRAM18_4502_K
FRAM18_bin001	0.174376	1.00605	0.368202	0.0227744	0.146138	0.113671	0.099642	0.14556	0.145566	0.833077	0.0274758
FRAM18_bin006	0.273532	0.043399	0.359925	0.039982	0.682579	0.388781	0.570406	0.427585	0.0295785	0.0344718	0.0525749
FRAM18_bin008	0.313146	0.0632289	0.410923	0.0547893	0.706342	0.417686	0.608343	0.454113	0.0496283	0.0480121	0.0679731
FRAM18_bin009	0.415509	0.117404	0.347962	0.122076	0.233042	0.215615	0.157613	0.190938	0.121856	0.0514791	0.0941144
FRAM18_bin012	0.359629	0.0336407	0.549676	0.00120577	0.256721	0.333926	0.369671	0.128252	0.0145533	0.00647908	0.00551895
FRAM18_bin013	0.390343	0.0162504	0.137708	0.00249794	0.485873	0.127352	0.0746341	0.129546	0.0264122	0.00368381	0.0018931
FRAM18_bin014	0.0710899	0.214834	0.0848061	0.229382	0.0874035	0.037249	0.0470545	0.0389179	0.395075	0.0240874	0.175148
FRAM18_bin016	0.538946	0.230377	0.215913	0.0919691	0.463119	0.571232	0.237293	0.502911	0.106307	0.28972	0.0769809
FRAM18_bin019	0.111645	1.83295	0.256085	0.390354	0.149513	0.108331	0.0831436	0.115559	2.35311	0.950299	0.39318
FRAM18_bin021	0.00504971	0.138578	0.0116025	1.49511	0.0111569	0.00763423	0.0113277	0.00743626	0.696769	0.0217305	1.69766
FRAM18_bin031	0.371499	0.123267	0.604205	0.236496	0.664896	0.516622	0.884964	0.760844	0.169195	0.0840654	0.26063
FRAM18_bin033	0.143316	0.972025	0.160988	0.266423	0.117388	0.0909332	0.0744698	0.0693207	1.52617	0.215009	0.285586
FRAM18_bin035	0.0380792	3.15708	0.19773	3.02216	0.0807642	0.03433	0.0859374	0.0627569	1.11565	0.991792	2.93928
FRAM18_bin043	0.336669	0.0622675	0.618089	0.183773	0.551725	0.524152	0.703569	0.948036	0.0304296	0.0981101	0.195985
FRAM18_bin046	0.206457	0.12073	0.398478	1.22722	0.355726	0.337041	0.432359	0.640933	0.0796751	0.0881876	1.22214
FRAM18_bin049	0.0400863	0.518033	0.270508	0.0729961	0.0123513	0.0346467	0.0699046	0.0873362	0.167768	1.7858	0.0995377
FRAM18_bin053	0.0740987	1.57518	0.493496	1.97307	0.0314753	0.0420123	0.0892365	0.0405885	1.95316	1.25261	2.30513
FRAM18_bin057	0.156286	0.315556	0.41459	0.895673	0.230861	0.212139	0.285821	0.40526	0.248561	0.117974	0.951898
FRAM18_bin059	0.0814331	0.170417	0.124671	0.549242	0.120338	0.0982867	0.103602	0.131068	0.139999	0.0669544	0.814759
FRAM18_bin061	0.711724	2.10828	0.948869	0.916806	1.21734	0.72022	0.578316	0.968443	1.30923	0.493245	0.821176
FRAM18_bin063	0.431307	0.706301	0.641671	0.402592	0.718498	0.492175	0.515156	0.706968	0.54202	0.432017	0.394308
FRAM18_bin064	0.122304	0.0232403	0.153448	0.0385095	0.401783	0.121554	0.251309	0.132716	0.0101828	0.0271726	0.0362094
FRAM18_bin072	0.237434	0.0206817	0.16448	0.09177	0.332151	0.243137	0.193514	0.25351	0.0166233	0.0408472	0.107984
FRAM18_bin074	0.125537	0.05498	0.309957	0.389032	0.147748	0.156975	0.351237	0.316391	0.0341942	0.0979122	0.3922
FRAM18_bin075	0.104082	0.0991025	0.29116	0.992376	0.123757	0.134381	0.320699	0.273821	0.0790359	0.0860688	0.972024
FRAM18_bin077	0.0115476	0.491354	0.0241658	0.233228	0.076066	0.00848426	0.00855814	0.00744177	0.455812	0.0187938	0.156276
FRAM18_bin081	0.144228	0.0424971	0.120886	0.0557246	0.351053	0.178779	0.163189	0.181572	0.0469748	0.0319476	0.0690878
FRAM18_bin082	0.127503	0.000989616	0.224892	0.000161521	0.376564	0.143126	0.24895	0.186405	0.000445963	0.00259493	0.000437068
FRAM18_bin083	0.0867792	0.0236036	0.139459	0.0451582	0.345136	0.109365	0.181462	0.162767	0.0244834	0.0191803	0.0427137
FRAM18_bin084	0.460075	0.0233249	0.405988	0.0978627	0.855101	0.532977	0.571149	0.674267	0.0405604	0.0290793	0.115802
FRAM18_bin085	0.0153067	0.0602538	0.0400716	0.00932688	0.00788058	0.0122853	0.00567296	0.0277332	0.0811765	0.528735	0.0144569
FRAM18_bin086	0.0450009	0.0809543	0.0581706	0.752686	0.0546967	0.0512344	0.0553388	0.0571508	0.168596	0.0365176	1.10073
FRAM18_bin087	0.0569537	0.033957	0.0527269	0.340651	0.0588336	0.0641412	0.0587931	0.060302	0.0401367	0.0235924	0.428544
FRAM18_bin088	1.85817	1.18465	1.88216	3.37781	1.88763	2.03565	2.2045	2.14312	1.07056	0.674345	3.60312
FRAM18_bin089	0.0409867	0.0308284	0.0459627	0.0993615	0.0458889	0.046888	0.0492732	0.0475018	0.0348372	0.0204696	0.22823
FRAM18_bin090	1.16931	0.984599	2.19199	0.837406	1.59547	1.57358	1.86882	2.59308	0.529935	0.848013	0.767437
FRAM18_bin091	0.0213093	0.0129965	0.0131379	0.21539	0.0204668	0.0267719	0.0181419	0.025149	0.0133752	0.0104174	0.338746
FRAM18_bin092	0.469368	0.0285235	0.160747	0.232871	0.426211	0.397722	0.363483	0.206974	0.292139	0.00919422	0.358321
FRAM18_bin097	0.991776	0.176136	0.206793	1.60017	0.442279	0.754723	0.467401	0.365516	2.18678	0.0363479	2.1968
FRAM18_bin100	0.686359	0.125988	0.146701	2.0864	0.320594	0.528538	0.332541	0.255381	1.65478	0.0178676	2.77448
FRAM18_bin101	0.0164735	0.00318493	0.00294779	1.29326	0.00887214	0.0132276	0.00747772	0.00540519	0.0791659	0.00142827	2.09042
FRAM18_bin104	0.0665391	0.003448	0.0888549	0.160724	0.124198	0.0617916	0.124534	0.103161	0.00495763	0.00155555	0.257979
FRAM18_bin106	0.182198	0.00241767	0.074616	0.00506349	0.221893	0.138755	0.13644	0.0507246	0.00464917	0.00165218	0.0109551
FRAM18_bin107	0.182311	0.00199176	0.0670667	0.00803471	0.202165	0.126153	0.101392	0.0626551	0.00545933	0.00119494	0.0138284
FRAM18_bin108	1.39144	0.102547	0.339751	0.0760499	0.660992	0.802697	0.599782	0.303791	0.487969	0.0167433	0.129155
FRAM18_bin109	0.156556	0.0180448	0.0132563	0.347108	0.0578297	0.0894176	0.0279022	0.0233106	0.499137	0.00280705	0.475152
FRAM18_bin110	0.00175952	0.000410252	0.000407953	0.0598378	0.00166909	0.00193663	0.00138781	0.000800871	0.0104801	7.07066e-05	0.153641
FRAM18_bin114	0.0861602	2.64992	0.519698	0.0759711	0.0299373	0.0533675	0.473041	0.148037	0.652913	3.1587	0.0651257
FRAM18_bin117	0.343478	1.03365	0.327451	0.242608	0.262411	0.292988	0.445544	0.238538	0.812538	0.126122	0.182834
FRAM18_bin118	0.226697	1.87204	0.367	0.292675	0.46623	0.259307	0.294799	0.378215	0.460357	0.952222	0.255361
FRAM18_bin121	0.310722	2.00093	0.412542	0.417069	0.543194	0.324074	0.343826	0.425059	0.586665	0.66875	0.403235
FRAM18_bin122	0.136327	1.42721	0.281786	0.188059	0.283738	0.172075	0.219392	0.264364	0.361149	0.469801	0.151957
FRAM18_bin125	0.0301632	0.0689537	0.0283023	0.153339	0.0295689	0.0341415	0.0345612	0.0287791	0.0888545	0.0370149	0.382088
FRAM18_bin126	0.209083	0.6227	0.160378	1.16251	0.13212	0.180138	0.323916	0.0906883	1.47105	0.314798	1.13271
FRAM18_bin137	0.151469	1.55989	0.684414	1.27044	0.0859198	0.171943	0.620949	0.324372	1.65015	1.24859	1.15777
FRAM18_bin141	0.786539	1.4588	1.31979	0.323699	2.47669	1.75733	2.21584	2.86355	0.731462	0.65944	0.268
FRAM18_bin143	0.128516	1.84431	0.0885654	1.62428	0.458228	0.163033	0.13851	0.199857	2.36713	0.0769005	1.51249
FRAM18_bin151	0.0706472	0.100512	0.0763487	0.799246	0.129052	0.090853	0.0998459	0.108539	0.10188	0.0360839	0.697284
FRAM18_bin161	2.13981	2.11005	1.38982	2.2051	1.61095	1.59714	1.01066	1.5406	1.57422	0.721335	1.77326
FRAM18_bin163	0.558218	2.02175	0.43147	0.842875	0.327426	0.501197	0.293116	0.221021	2.5084	0.654145	0.450095
FRAM18_bin168	1.60801	5.71994	1.35481	0.625243	0.832809	1.89064	0.705453	1.04941	2.06477	5.50616	0.637923
FRAM18_bin170	0.0750741	0.710729	0.0394355	2.82832	0.120464	0.0736479	0.045475	0.0558573	2.19455	0.180111	3.16101
FRAM18_bin171	0.0270906	0.430636	0.0218145	0.87371	0.0482454	0.0340694	0.0240218	0.0311541	1.17854	0.149601	0.970764
FRAM18_bin174	0.0189045	0.0435494	0.0241921	1.31978	0.0110877	0.0203727	0.0206984	0.0209933	0.0569309	0.640354	0.979467
FRAM18_bin181	0.489259	0.425845	0.135261	0.783195	0.260245	0.356147	0.116676	0.236725	0.417574	0.11145	0.727224
FRAM18_bin185	0.616312	0.0781828	0.522022	0.0557697	0.440032	0.693961	0.511394	0.854111	0.0490485	0.0581303	0.0474439
FRAM18_bin188	0.861294	1.78269	0.624971	0.726779	0.46329	0.777132	1.01449	0.57778	2.17884	0.343066	0.476867
FRAM18_bin189	0.672245	1.49476	0.501498	0.638705	0.374274	0.60968	0.807858	0.458599	1.90519	0.271836	0.429136
FRAM18_bin190	0.000255112	0.0125863	0.000302675	0.223999	0.00189164	0.000437044	0.000346951	0.000242188	0.0134495	0.000791914	0.194594
FRAM18_bin194	0.00313262	0.123558	0.00803186	0.524375	0.0163249	0.00382514	0.00650991	0.00312092	0.0759253	0.00909523	0.294718
FRAM18_bin195	0.00760458	0.0239481	0.00511038	0.155315	0.0203011	0.0107898	0.009109	0.0134799	0.0468076	0.0053572	0.34225
FRAM18_bin196	0.0220334	0.0784458	0.0132212	0.323364	0.0646371	0.0294624	0.0238179	0.0389702	0.171172	0.0172831	0.675089
FRAM18_bin198	0.0288689	0.38606	0.659634	0.1394	0.0248657	0.0308497	0.072942	0.0684786	0.0819086	1.76104	0.0973756
FRAM18_bin200	0.0341062	1.65957	0.0748441	0.318068	0.0322468	0.0389169	0.0515801	0.0363777	2.13532	0.0708032	0.159765
FRAM18_bin202	0.00300506	1.48575	0.0383388	0.237507	0.00297222	0.00438247	0.0142281	0.00521804	1.92115	0.0317143	0.0914506
FRAM18_bin205	0.0688201	1.47153	0.163668	0.12741	0.0610046	0.0796422	0.0706959	0.0724004	2.50163	0.233549	0.110964
FRAM18_bin207	0.0723842	1.41183	0.26674	1.65611	0.061922	0.0956244	0.128299	0.19607	1.95551	0.220138	1.33081
FRAM18_bin208	0.0809154	2.7095	0.473577	3.37994	0.0689149	0.111735	0.194253	0.252153	3.80788	0.499738	2.72717
FRAM18_bin209	0.00268618	0.312192	0.00671588	0.0342499	0.00262851	0.00415793	0.00946204	0.00321174	0.0639251	0.0933115	0.0181629
FRAM18_bin210	0.0533746	0.0671749	0.0388126	0.221114	0.0532106	0.0508695	0.0335812	0.0602855	0.0462947	0.0172783	0.150178
FRAM18_bin211	1.96484	0.151186	0.272938	0.118233	1.41848	1.60562	0.44068	1.18004	0.283971	0.0730847	0.157626
FRAM18_bin212	0.1009	0.0192036	0.110077	0.0368417	0.0886868	0.0895258	0.171729	0.0594598	0.0655009	0.0682177	0.0924903
FRAM18_bin213	0.127319	0.00983039	0.0379353	0.0187402	0.0102396	0.150796	0.155349	0.0290708	0.00851047	0.0250584	0.0176043
FRAM18_bin214	0.182529	0.406146	0.116903	0.407134	0.315901	0.170186	0.0900369	0.193679	0.167838	0.0785668	0.301556
FRAM18_bin215	0.00849747	0.306452	0.0279733	0.16883	0.0136321	0.00978738	0.0133089	0.0110416	0.156098	0.0533717	0.0872507
FRAM18_bin216	0.00662915	0.0847374	0.0149934	0.0546729	0.00703985	0.00794297	0.00890204	0.0189952	0.0227144	0.412288	0.0415577
FRAM18_bin217	0.012084	0.225526	0.0420104	0.00287732	0.00317251	0.0132917	0.0277318	0.0185301	0.0376765	0.622435	0.00366206
FRAM18_bin218	0.167548	0.234079	0.382173	0.188423	0.0591674	0.170102	0.210137	0.0576985	0.158176	0.285374	0.151215
FRAM18_bin219	0.0940199	0.27205	0.120649	1.44976	0.223319	0.162536	0.188739	0.229415	0.281693	0.0771456	1.17272
FRAM18_bin220	0.0595348	0.0953382	0.058855	0.228041	0.11148	0.0711339	0.0965164	0.105231	0.10501	0.0398078	0.608272
FRAM18_bin221	0.048655	0.250298	0.0680273	0.560496	0.0477558	0.0576096	0.0550588	0.0620193	0.321008	0.0865449	0.657917
FRAM18_bin222	0.145808	0.572471	0.0798536	0.716761	0.108216	0.118419	0.0685016	0.0771561	0.477891	0.113215	0.732694
FRAM18_bin223	0.0965973	0.149601	0.0518189	0.649753	0.211982	0.112801	0.0687542	0.0975026	0.190612	0.0482101	0.880881
FRAM18_bin228	0.219396	1.8263	2.16287	0.661739	0.247391	0.189922	3.37494	0.289414	0.419599	3.15673	0.550662
FRAM18_bin231	0.153547	0.297865	0.680615	0.11137	0.0340049	0.0762862	0.575876	0.0799825	0.177371	1.09098	0.0922472
FRAM18_bin232	0.208486	0.842874	0.289998	0.0325483	0.0370167	0.116651	0.147957	0.0939055	0.261569	1.61256	0.0311973
FRAM18_bin237	1.66484	0.825192	0.781998	0.345688	0.657943	1.33085	0.701792	0.898605	0.436516	1.20432	0.328272
FRAM18_bin246	4.52425	0.217537	2.02172	0.0959696	3.91256	4.55267	2.67805	4.50916	0.372197	0.310322	0.106528
FRAM18_bin252	2.12323	1.4122	2.39153	1.5449	1.62614	2.24313	2.56844	2.16712	2.37884	1.90868	1.43965
FRAM18_bin259	0.483099	0.268606	0.45614	0.573008	0.377983	0.6013	0.544769	0.695269	0.548654	0.265562	0.69236
FRAM18_bin263	3.64733	2.71952	2.61507	3.0664	1.70134	4.94154	4.03381	2.76263	2.92428	4.32639	3.06955
FRAM18_bin273	0.429739	0.0417486	0.263788	0.0490572	0.372177	0.303601	0.320279	0.268484	0.0378251	0.0332462	0.0538188
FRAM18_bin281	0.580491	0.545523	0.973017	0.636192	0.432111	0.333284	1.38466	0.256023	1.06905	0.637437	0.397378
FRAM18_bin283	0.0951942	0.423352	0.119157	0.808896	0.0908183	0.0991167	0.121177	0.0967925	0.312029	0.151562	0.719993
FRAM18_bin287	0.423557	0.108927	0.19473	0.114514	0.731237	0.295389	0.246214	0.284133	0.159826	0.0824133	0.108018
FRAM18_bin288	0.00215719	0.0136385	0.00435589	0.34411	0.00303156	0.00365272	0.00504601	0.00701519	0.0108852	0.00623632	0.385204
FRAM18_bin290	0.233337	2.63531	0.623423	0.28191	0.270796	0.177652	0.251786	0.231785	3.24003	0.49217	0.219232
FRAM18_bin294	0.21148	0.044824	0.10269	0.0284051	0.178964	0.160399	0.123073	0.152909	0.0314478	0.0700373	0.0291129
FRAM18_bin297	3.53787	0.792504	3.25183	3.60939	4.19165	3.11465	3.75832	4.47345	0.877273	0.761833	3.78499
FRAM18_bin301	4.9958	1.16001	4.25878	1.47426	7.42843	6.22673	7.006	6.82901	1.7187	1.74587	1.15249
FRAM18_bin302	0.489544	0.0699495	0.668601	0.0568403	0.528375	0.675156	0.971132	0.623721	0.0790916	0.0536192	0.073055
FRAM18_bin308	0.39151	0.0632853	0.855715	0.10453	0.302696	0.422345	1.14473	1.26018	0.0546528	0.111969	0.106707
FRAM18_bin311	0.365755	0.152429	0.593713	0.29097	0.369319	0.378372	0.776614	0.854777	0.20395	0.120993	0.285749
FRAM18_bin313	1.18679	1.20164	0.557804	1.1851	1.81243	0.860411	0.635846	0.909797	2.00017	0.705058	0.896967
FRAM18_bin315	0.0361546	0.00910697	0.0539464	0.0110398	0.114284	0.0487725	0.0864122	0.0720756	0.00421435	0.00526057	0.00790084
FRAM18_bin316	1.34009	0.312264	0.681444	0.198915	0.556883	1.46864	0.814715	1.03862	0.394477	0.267493	0.182813
FRAM18_bin317	0.217205	0.104348	0.229959	0.0839494	0.196772	0.22867	0.239692	0.238797	0.0816485	0.0970378	0.0846231
FRAM18_bin318	0.490523	0.803001	0.742063	0.508527	0.806611	0.565747	0.595481	0.815234	0.618421	0.468337	0.493437
FRAM18_bin319	0.0667267	0.102626	0.0715673	0.0474382	0.0707002	0.0700754	0.0764541	0.0659301	0.223662	0.0331638	0.0536611
FRAM18_bin320	0.152793	0.142464	0.121614	0.207798	0.0727352	0.136306	0.153718	0.124465	0.100632	0.267655	0.185697
FRAM18_bin321	0.0173513	0.0240733	0.0152434	0.378383	0.0118097	0.0165916	0.0202845	0.0170797	0.0219414	0.0192817	0.447708
FRAM18_bin322	0.00874132	0.00888775	0.00720718	0.179675	0.0067728	0.00890126	0.0109533	0.00909305	0.00899359	0.00859321	0.308195
FRAM18_bin323	0.0937385	0.0715185	0.0828014	0.210728	0.112605	0.095901	0.0977855	0.100296	0.103229	0.0446442	0.249121
FRAM18_bin324	0.00167698	0.00455975	0.00293902	0.116332	0.00187433	0.00186445	0.00386212	0.00196778	0.00676006	0.00300032	0.121839
FRAM18_bin325	0.0748715	0.195214	0.087846	0.302663	0.107086	0.0842131	0.101331	0.0898351	0.210576	0.0409203	0.254945
FRAM18_bin326	0.0155431	1.0244	0.0891532	1.04069	0.0141564	0.0153968	0.0532205	0.0239903	1.19098	0.35428	0.300369
FRAM18_bin328	0.00835866	10.755	0.00506652	1.30505	0.00842705	0.00370485	0.00435515	0.0119277	7.3883	0.00141413	0.336441
FRAM18_bin335	0.00167323	0.715561	0.000973824	0.259241	0.00119433	0.000697666	0.00111085	0.00194576	1.0335	0.000591579	0.0362482
FRAM18_bin339	0.0586607	0.346594	0.11885	1.45987	0.370508	0.0303525	0.0580809	0.0854592	0.25922	0.0215797	0.75177
FRAM18_bin340	0.00349653	0.03127	0.00513232	1.32574	0.00567985	0.00524052	0.00584035	0.00479972	0.065159	0.00917772	1.53404
FRAM18_bin341	0.00538736	0.0642749	0.00717208	0.189655	0.0208377	0.00528462	0.00663164	0.00637669	0.0521257	0.00262793	0.175505
FRAM18_bin343	3.01042	0.178081	2.09466	0.0872137	2.61729	2.97183	2.89699	1.37606	0.163724	0.0755524	0.15721
FRAM18_bin345	0.142709	0.0267917	0.302715	0.027774	0.0962064	0.153306	0.327641	0.209481	0.0228185	0.01334	0.0346447
FRAM18_bin347	0.0608441	0.00298764	0.087517	0.000368117	0.131769	0.081659	0.110401	0.0723784	0.00203285	0.00348819	0.000504309
FRAM18_bin348	0.129968	0.0145185	0.220843	0.00395162	0.412179	0.149088	0.233008	0.180898	0.00968484	0.00588043	0.0069905
FRAM18_bin349	0.177997	0.0111457	0.211421	0.0038765	0.296789	0.230049	0.278298	0.156684	0.00879291	0.00558111	0.00935687
	59.036	89.7446	56.3884	78.398	60.2257	60.5074	64.3125	60.9367	86.8879	52.3983	76.9339

## Sheet: Supplementary_table_S4
Supplementary table S4. Relative abundance of phylogenetic groups across short read illumina metagenomes derived from 16S rRNA gene composition. 16S rRNA genes >120 bp in length were extracted using SortmeRNA, clustered at 99% identity threshold using CD-HIT-EST and phylogenetically placed into the SILVA 138 NR99 reference tree using parsimony in ARB.
Taxa	FRAM18_4514_A	FRAM18_4514_B	FRAM18_4514_C	FRAM18_4514_D	FRAM18_4502_E	FRAM18_4502_F	FRAM18_4502_G	FRAM18_4502_H	FRAM18_4502_I	FRAM18_4502_J	FRAM18_4502_K
Archaea;Euryarchaeota;Halobacteria;Halobacteriales;Halomicrobiaceae;uncultured;	0.0012	0	0	0	0.0026	0	0.0041	0	0	0	0
Archaea;Euryarchaeota;Thermoplasmata;Marine Group II;	1.2851	0.1108	0.5091	1.3379	0.9689	0.8451	0.8787	0.3969	1.2476	0.0291	1.8717
Archaea;Euryarchaeota;Thermoplasmata;Marine Group III;	0.0322	0.0043	0.0626	0	0.0581	0.0121	0.0774	0.006	0.0013	0	0.0029
Archaea;Thaumarchaeota;Marine Benthic Group A;	0	0	0.0042	0	0	0	0.0072	0	0	0	0
Archaea;Thaumarchaeota;Nitrososphaeria;Nitrosopumilales;Nitrosopumilaceae;	0.0211	0.0217	0.0292	0	0.015	0.0316	0.0217	0.0086	0.0013	0.0007	0.0022
Archaea;Thaumarchaeota;Nitrososphaeria;Nitrosopumilales;Nitrosopumilaceae;Candidatus Nitrosoarchaeum;	0.2528	0.0282	0.491	0.0058	0.6659	0.3084	0.4249	0.272	0.0207	0.0199	0.0344
Archaea;Thaumarchaeota;Nitrososphaeria;Nitrosopumilales;Nitrosopumilaceae;Candidatus Nitrosopelagicus;	0.0062	0.0098	0.0334	0.0046	0.0035	0.0085	0.0361	0.0051	0.0065	0.005	0.0124
Archaea;Thaumarchaeota;Nitrososphaeria;Nitrosopumilales;Nitrosopumilaceae;Candidatus Nitrosopumilus;	0.6989	0.0967	1.1044	0.0185	1.7968	0.8487	1.3892	0.6646	0.0776	0.0539	0.0659
Bacteria;Acidobacteria;Acidobacteriia;Solibacterales;Solibacteraceae (Subgroup 3);PAUC26f;	0	0	0	0	0.0009	0.0036	0	0	0	0	0
Bacteria;Acidobacteria;Acidobacteriia;Solibacterales;Solibacteraceae (Subgroup 3);Paludibaculum;	0	0	0	0	0	0	0	0.0009	0	0	0
Bacteria;Acidobacteria;Aminicenantia;Aminicenantales;	0	0	0	0	0	0	0.001	0	0	0	0
Bacteria;Acidobacteria;Holophagae;Subgroup 7;	0	0	0.0014	0	0	0	0	0	0	0	0
Bacteria;Acidobacteria;Subgroup 21;	0	0	0.0028	0.0012	0	0	0.001	0	0.0013	0.0021	0
Bacteria;Acidobacteria;Subgroup 22;	0	0	0	0	0	0.0049	0	0	0	0	0.0007
Bacteria;Acidobacteria;Subgroup 26;	0	0	0.0014	0	0	0	0	0	0	0	0
Bacteria;Acidobacteria;Subgroup 5;	0	0	0.0042	0	0	0.0012	0	0.0009	0	0	0
Bacteria;Acidobacteria;Subgroup 6;	0.0037	0.0043	0.0862	0	0.0132	0.017	0.0217	0.0077	0	0.0007	0
Bacteria;Acidobacteria;Subgroup 6;Unknown Order;Unknown Family;Luteitalea;	0	0	0	0	0	0	0.001	0.0009	0	0	0
Bacteria;Acidobacteria;Subgroup 6;Unknown Order;Unknown Family;Vicinamibacter;	0	0	0.0028	0	0	0	0	0	0	0	0
Bacteria;Actinobacteria;Acidimicrobiia;Actinomarinales;Actinomarinaceae;Candidatus Actinomarina;	0.0892	0.0174	0.0807	0.1269	0.0537	0.0595	0.0505	0.0821	0.0207	0.0057	0.1946
Bacteria;Actinobacteria;Acidimicrobiia;Actinomarinales;uncultured;	0.0012	0	0.0042	0	0.0026	0	0	0	0	0	0
Bacteria;Actinobacteria;Acidimicrobiia;IMCC26256;	0.0012	0	0	0	0.0009	0	0	0	0	0	0
Bacteria;Actinobacteria;Acidimicrobiia;Microtrichales;Iamiaceae;Iamia;	0	0	0.0014	0	0	0.0012	0.0031	0	0	0	0.0007
Bacteria;Actinobacteria;Acidimicrobiia;Microtrichales;Ilumatobacteraceae;CL500-29 marine group;	0.0025	0.0011	0	0	0	0	0	0	0	0	0
Bacteria;Actinobacteria;Acidimicrobiia;Microtrichales;Ilumatobacteraceae;Ilumatobacter;	0.0558	0.1249	0.0515	0.1361	0.0687	0.017	0.0062	0.0197	0.2987	0.0149	0.0973
Bacteria;Actinobacteria;Acidimicrobiia;Microtrichales;Ilumatobacteraceae;uncultured;	0.0012	0	0.0056	0	0.0053	0.0036	0.0031	0	0	0	0
Bacteria;Actinobacteria;Acidimicrobiia;Microtrichales;Microtrichaceae;Sva0996 marine group;	0.4312	0.025	0.4201	0.0288	0.5364	0.2671	0.3434	0.2318	0.0504	0.0156	0.0249
Bacteria;Actinobacteria;Acidimicrobiia;Microtrichales;Microtrichaceae;uncultured;	0.0074	0.0011	0.0167	0	0.007	0.0049	0.0041	0.0068	0.0039	0	0.0015
Bacteria;Actinobacteria;Acidimicrobiia;uncultured;	0.0025	0	0	0	0.0009	0.0024	0	0.0009	0	0	0
Bacteria;Actinobacteria;Actinobacteria;Actinomycetales;Actinomycetaceae;Actinomyces;	0.0012	0	0	0	0	0	0	0	0	0	0
Bacteria;Actinobacteria;Actinobacteria;Corynebacteriales;Corynebacteriaceae;Corynebacterium 1;	0.0025	0	0.0014	0	0	0	0.0021	0	0	0	0
Bacteria;Actinobacteria;Actinobacteria;Corynebacteriales;Corynebacteriaceae;Turicella;	0	0	0	0	0	0	0	0	0	0.0014	0
Bacteria;Actinobacteria;Actinobacteria;Corynebacteriales;Mycobacteriaceae;Mycobacterium;	0	0	0	0	0	0	0.0041	0	0	0	0
Bacteria;Actinobacteria;Actinobacteria;Corynebacteriales;Nocardiaceae;Rhodococcus;	0.0025	0	0	0	0	0	0.001	0	0	0	0
Bacteria;Actinobacteria;Actinobacteria;Frankiales;Cryptosporangiaceae;Fodinicola;	0.0149	0	0.0292	0	0.0088	0.0085	0.0155	0.0154	0.0026	0.0014	0
Bacteria;Actinobacteria;Actinobacteria;Frankiales;Nakamurellaceae;Nakamurella;	0	0	0.0014	0	0	0	0	0	0	0	0
Bacteria;Actinobacteria;Actinobacteria;Micrococcales;Demequinaceae;Demequina;	0	0.0011	0.0014	0	0.0009	0	0	0.0009	0	0	0
Bacteria;Actinobacteria;Actinobacteria;Micrococcales;Demequinaceae;Lysinimicrobium;	0.0012	0	0	0	0	0	0	0	0.0013	0	0
Bacteria;Actinobacteria;Actinobacteria;Micrococcales;Dermabacteraceae;Brachybacterium;	0	0.0011	0	0	0	0	0	0	0	0	0
Bacteria;Actinobacteria;Actinobacteria;Micrococcales;Dermacoccaceae;Barrientosiimonas;	0	0	0	0	0	0.0036	0	0	0	0	0
Bacteria;Actinobacteria;Actinobacteria;Micrococcales;Intrasporangiaceae;	0.0012	0	0	0	0	0	0	0	0	0	0
Bacteria;Actinobacteria;Actinobacteria;Micrococcales;Intrasporangiaceae;Janibacter;	0	0	0	0	0	0	0.0031	0	0	0	0
Bacteria;Actinobacteria;Actinobacteria;Micrococcales;Intrasporangiaceae;Lapillicoccus;	0.0012	0	0	0	0	0	0	0	0	0	0
Bacteria;Actinobacteria;Actinobacteria;Micrococcales;Intrasporangiaceae;Ornithinicoccus;	0.0012	0	0	0	0	0	0	0	0	0	0
Bacteria;Actinobacteria;Actinobacteria;Micrococcales;Intrasporangiaceae;uncultured;	0.0012	0	0	0	0	0	0	0	0	0	0
Bacteria;Actinobacteria;Actinobacteria;Micrococcales;Microbacteriaceae;Agrococcus;	0	0	0	0	0	0	0	0.0017	0	0	0
Bacteria;Actinobacteria;Actinobacteria;Micrococcales;Microbacteriaceae;CB31G03;	0.0012	0	0	0	0.0044	0.0036	0	0	0.0052	0	0.0022
Bacteria;Actinobacteria;Actinobacteria;Micrococcales;Microbacteriaceae;Candidatus Aquiluna;	0.1462	0.7506	0.2949	0.0046	0.14	0.0874	0.0784	0.13	0.0879	0.5531	0.011
Bacteria;Actinobacteria;Actinobacteria;Micrococcales;Microbacteriaceae;Candidatus Limnoluna;	0	0	0	0	0	0	0	0	0	0.0007	0
Bacteria;Actinobacteria;Actinobacteria;Micrococcales;Microbacteriaceae;Cryobacterium;	0	0	0	0	0	0	0	0	0	0.0064	0
Bacteria;Actinobacteria;Actinobacteria;Micrococcales;Microbacteriaceae;Diaminobutyricimonas;	0	0.0163	0.007	0.0012	0.0035	0	0.0031	0.0034	0.0052	0.0113	0
Bacteria;Actinobacteria;Actinobacteria;Micrococcales;Microbacteriaceae;Frigoribacterium;	0.0012	0	0	0	0	0	0	0	0	0	0
Bacteria;Actinobacteria;Actinobacteria;Micrococcales;Microbacteriaceae;Galbitalea;	0.0012	0	0	0	0	0	0	0.0017	0.0039	0	0
Bacteria;Actinobacteria;Actinobacteria;Micrococcales;Microbacteriaceae;Glaciibacter;	0.0025	0.0022	0	0	0	0	0	0	0	0	0
Bacteria;Actinobacteria;Actinobacteria;Micrococcales;Microbacteriaceae;Herbiconiux;	0	0.0011	0	0	0	0	0	0	0.0013	0	0
Bacteria;Actinobacteria;Actinobacteria;Micrococcales;Microbacteriaceae;Huakuichenia;	0	0	0	0	0	0	0	0	0.0065	0	0
Bacteria;Actinobacteria;Actinobacteria;Micrococcales;Microbacteriaceae;Klugiella;	0	0	0	0	0	0	0	0	0.0026	0	0
Bacteria;Actinobacteria;Actinobacteria;Micrococcales;Microbacteriaceae;Leucobacter;	0	0	0	0	0	0	0	0	0.0013	0	0
Bacteria;Actinobacteria;Actinobacteria;Micrococcales;Microbacteriaceae;Lysinimonas;	0.0012	0	0	0	0	0	0	0	0	0	0
Bacteria;Actinobacteria;Actinobacteria;Micrococcales;Microbacteriaceae;ML602J-51;	0.0248	0.0011	0	0.0046	0.0167	0.0121	0.0021	0.0026	0.0155	0	0.0007
Bacteria;Actinobacteria;Actinobacteria;Micrococcales;Microbacteriaceae;Marisediminicola;	0	0	0	0	0	0	0	0	0.0013	0	0
Bacteria;Actinobacteria;Actinobacteria;Micrococcales;Microbacteriaceae;Microbacterium;	0.0025	0.0054	0.0042	0	0	0	0	0	0.0039	0	0
Bacteria;Actinobacteria;Actinobacteria;Micrococcales;Microbacteriaceae;Mycetocola;	0	0.0087	0.0056	0	0	0	0	0	0.0091	0	0
Bacteria;Actinobacteria;Actinobacteria;Micrococcales;Microbacteriaceae;Okibacterium;	0.0012	0.0022	0.0028	0	0	0	0	0	0.0052	0	0
Bacteria;Actinobacteria;Actinobacteria;Micrococcales;Microbacteriaceae;Parafrigoribacterium;	0	0.0054	0	0	0	0	0	0	0.0013	0	0
Bacteria;Actinobacteria;Actinobacteria;Micrococcales;Microbacteriaceae;Plantibacter;	0	0	0	0	0	0	0	0	0.0026	0	0
Bacteria;Actinobacteria;Actinobacteria;Micrococcales;Microbacteriaceae;Rhodoglobus;	0.0012	0	0	0	0	0	0	0	0	0	0
Bacteria;Actinobacteria;Actinobacteria;Micrococcales;Microbacteriaceae;Rhodoluna;	0	0	0.0125	0.0035	0	0	0	0.0009	0.0039	0	0.0007
Bacteria;Actinobacteria;Actinobacteria;Micrococcales;Microbacteriaceae;SV1-3;	0.0025	0.0109	0.0042	0	0.0009	0	0	0.0034	0.0039	0.0142	0
Bacteria;Actinobacteria;Actinobacteria;Micrococcales;Microbacteriaceae;XZXXH163;	0.0037	0.0033	0.0014	0	0.0018	0.0024	0.001	0.0009	0.0142	0.005	0
Bacteria;Actinobacteria;Actinobacteria;Micrococcales;Microbacteriaceae;uncultured;	0.005	0	0	0	0	0	0	0	0.0013	0	0
Bacteria;Actinobacteria;Actinobacteria;Micrococcales;Micrococcaceae;Arthrobacter;	0.0025	0	0	0	0	0	0	0	0	0	0
Bacteria;Actinobacteria;Actinobacteria;Micrococcales;Micrococcaceae;Kocuria;	0	0	0	0	0	0	0.0021	0	0	0	0
Bacteria;Actinobacteria;Actinobacteria;Micrococcales;Micrococcaceae;Nesterenkonia;	0.0025	0.0022	0	0	0	0	0	0	0.0039	0	0
Bacteria;Actinobacteria;Actinobacteria;Micrococcales;Micrococcales Incertae Sedis;Timonella;	0	0	0	0	0	0.0012	0	0	0	0	0
Bacteria;Actinobacteria;Actinobacteria;PeM15;	0.3569	0.0923	0.2225	0.0934	0.1629	0.1615	0.1073	0.1437	0.1151	0.0262	0.0527
Bacteria;Actinobacteria;Actinobacteria;Propionibacteriales;Nocardioidaceae;Nocardioides;	0	0	0.0028	0	0	0	0	0	0	0	0
Bacteria;Actinobacteria;Actinobacteria;Propionibacteriales;Nocardioidaceae;uncultured;	0	0	0	0	0	0	0	0	0	0	0.0007
Bacteria;Actinobacteria;Actinobacteria;Propionibacteriales;Propionibacteriaceae;Cutibacterium;	0	0	0	0.0023	0.0035	0.0012	0	0	0	0	0.0015
Bacteria;Actinobacteria;Actinobacteria;Propionibacteriales;Propionibacteriaceae;uncultured;	0	0	0.007	0	0	0	0	0	0	0	0
Bacteria;Actinobacteria;Actinobacteria;Pseudonocardiales;Pseudonocardiaceae;Crossiella;	0	0	0	0	0	0.0012	0	0	0	0	0
Bacteria;Actinobacteria;Actinobacteria;Streptomycetales;Streptomycetaceae;Streptomyces;	0	0.0011	0	0	0	0.0012	0	0	0	0.0007	0
Bacteria;Actinobacteria;Coriobacteriia;OPB41;	0	0	0.0014	0	0	0	0	0	0	0	0
Bacteria;Actinobacteria;MB-A2-108;	0	0	0.0028	0	0	0	0	0	0	0	0
Bacteria;Actinobacteria;Rubrobacteria;Rubrobacterales;Rubrobacteriaceae;Rubrobacter;	0.0025	0	0	0	0	0	0	0	0	0	0
Bacteria;Actinobacteria;Thermoleophilia;Gaiellales;uncultured;	0.0087	0	0.0042	0	0	0	0	0	0	0	0
Bacteria;Actinobacteria;Thermoleophilia;Solirubrobacterales;67-14;	0	0	0.0028	0	0	0.0012	0	0	0	0	0
Bacteria;AncK6;	0	0	0.0056	0	0.0018	0.0073	0.0103	0	0	0	0
Bacteria;Bacteroidetes;Bacteroidia;Bacteroidales;Bacteroidetes BD2-2;	0.0012	0	0	0	0	0	0.001	0	0	0	0
Bacteria;Bacteroidetes;Bacteroidia;Bacteroidales;Dysgonomonadaceae;Candidatus Symbiothrix;	0	0	0	0.0081	0	0	0	0	0	0	0
Bacteria;Bacteroidetes;Bacteroidia;Bacteroidales;Marinilabiliaceae;Saccharicrinis;	0	0	0	0	0	0	0.001	0	0	0	0
Bacteria;Bacteroidetes;Bacteroidia;Bacteroidales;Paludibacteraceae;uncultured;	0.0112	0.0098	0.0278	0.0058	0.0018	0.0097	0.0072	0.0034	0.0091	0.0305	0.0088
Bacteria;Bacteroidetes;Bacteroidia;Bacteroidales;Prolixibacteraceae;Draconibacterium;	0	0	0	0.0035	0	0	0.0021	0	0.0013	0	0
Bacteria;Bacteroidetes;Bacteroidia;Bacteroidales;Prolixibacteraceae;WCHB1-32;	0	0	0	0	0	0	0	0	0.0013	0	0
Bacteria;Bacteroidetes;Bacteroidia;Bacteroidales;Rikenellaceae;Rikenellaceae RC9 gut group;	0	0	0	0	0	0	0	0	0	0	0.0007
Bacteria;Bacteroidetes;Bacteroidia;Bacteroidales;Rikenellaceae;dgA-11 gut group;	0	0.0011	0	0	0	0	0.001	0	0	0	0
Bacteria;Bacteroidetes;Bacteroidia;Bacteroidales;Rs-E47 termite group;GWE2-42-42;	0	0.0011	0	0	0	0	0	0	0	0	0
Bacteria;Bacteroidetes;Bacteroidia;Bacteroidetes VC2.1 Bac22;	0	0.0185	0	0.0023	0	0	0	0	0.0388	0.0021	0
Bacteria;Bacteroidetes;Bacteroidia;Chitinophagales;37-13;	0	0	0	0	0	0	0.001	0	0	0	0.0007
Bacteria;Bacteroidetes;Bacteroidia;Chitinophagales;Chitinophagaceae;uncultured;	0.0012	0.0033	0.0028	0.0035	0.0018	0	0.0021	0	0	0.0184	0.0007
Bacteria;Bacteroidetes;Bacteroidia;Chitinophagales;Saprospiraceae;Aureispira;	0	0	0.0209	0.1326	0.0203	0.0012	0.0041	0.0017	0.0026	0	0.0366
Bacteria;Bacteroidetes;Bacteroidia;Chitinophagales;Saprospiraceae;Lewinella;	0	0	0.0028	0	0	0	0.001	0	0	0.0149	0
Bacteria;Bacteroidetes;Bacteroidia;Chitinophagales;Saprospiraceae;Portibacter;	0	0	0	0	0	0	0	0	0	0.0007	0
Bacteria;Bacteroidetes;Bacteroidia;Chitinophagales;Saprospiraceae;Rubidimonas;	0	0	0	0	0	0	0	0	0	0.0014	0
Bacteria;Bacteroidetes;Bacteroidia;Chitinophagales;Saprospiraceae;uncultured;	0.0025	0.0152	0.0042	0.1315	0.0044	0.0024	0.0021	0	0.0207	0	0.0849
Bacteria;Bacteroidetes;Bacteroidia;Chitinophagales;uncultured;	0.0037	0.0206	0.0348	0.0092	0.0026	0	0.0072	0.0017	0.0142	0.3007	0.0073
Bacteria;Bacteroidetes;Bacteroidia;Cytophagales;Amoebophilaceae;	0	0.0011	0	0	0.0035	0	0.0021	0	0	0	0.0007
Bacteria;Bacteroidetes;Bacteroidia;Cytophagales;Amoebophilaceae;Candidatus Amoebophilus;	0.0037	0.0011	0	0.0012	0.0079	0.0012	0.0021	0.0009	0.0013	0.0064	0.0015
Bacteria;Bacteroidetes;Bacteroidia;Cytophagales;Amoebophilaceae;Candidatus Cardinium;	0	0	0	0	0.0018	0.0024	0	0	0	0	0
Bacteria;Bacteroidetes;Bacteroidia;Cytophagales;Amoebophilaceae;uncultured;	0	0	0	0.0012	0.0035	0.0036	0.0021	0	0	0.0057	0.0022
Bacteria;Bacteroidetes;Bacteroidia;Cytophagales;Cyclobacteriaceae;Belliella;	0	0.0022	0	0.0012	0.0009	0	0.001	0	0	0	0
Bacteria;Bacteroidetes;Bacteroidia;Cytophagales;Cyclobacteriaceae;Fabibacter;	0	0	0	0.0035	0	0	0	0.0017	0	0	0.0007
Bacteria;Bacteroidetes;Bacteroidia;Cytophagales;Cyclobacteriaceae;Fulvivirga;	0	0.0022	0	0	0.0009	0	0	0	0	0	0.0015
Bacteria;Bacteroidetes;Bacteroidia;Cytophagales;Cyclobacteriaceae;Imperialibacter;	0	0	0	0	0.0009	0	0	0	0	0	0
Bacteria;Bacteroidetes;Bacteroidia;Cytophagales;Cyclobacteriaceae;Marinoscillum;	0.264	2.28	0.5369	0.3172	0.6421	0.323	0.3981	0.4756	0.6762	1.051	0.2985
Bacteria;Bacteroidetes;Bacteroidia;Cytophagales;Cyclobacteriaceae;Marivirga;	0	0.0011	0	0.0012	0.0026	0	0.001	0	0.0013	0	0.0007
Bacteria;Bacteroidetes;Bacteroidia;Cytophagales;Cyclobacteriaceae;Reichenbachiella;	0	0	0	0	0.0009	0	0	0.0009	0	0.0014	0.0007
Bacteria;Bacteroidetes;Bacteroidia;Cytophagales;Cyclobacteriaceae;uncultured;	0.0248	0.0054	0.0389	0.2157	0.0035	0.0036	0.0196	0.0009	0.0931	0.0057	0.169
Bacteria;Bacteroidetes;Bacteroidia;Cytophagales;Cytophagaceae;Cytophaga;	0.0074	0	0	0	0.0009	0	0	0	0	0	0
Bacteria;Bacteroidetes;Bacteroidia;Cytophagales;Flammeovirgaceae;Algivirga;	0	0	0	0	0	0	0	0	0	0	0.0007
Bacteria;Bacteroidetes;Bacteroidia;Cytophagales;Flammeovirgaceae;Rapidithrix;	0	0	0	0.0012	0	0	0	0	0	0	0
Bacteria;Bacteroidetes;Bacteroidia;Cytophagales;Flammeovirgaceae;uncultured;	0.0012	0	0	0	0	0	0	0	0	0	0
Bacteria;Bacteroidetes;Bacteroidia;Cytophagales;Hymenobacteraceae;Hymenobacter;	0.0012	0	0	0	0	0	0	0	0.0013	0	0.0059
Bacteria;Bacteroidetes;Bacteroidia;Cytophagales;Microscillaceae;uncultured;	0	0.0011	0	0	0.0009	0	0	0	0	0	0.0015
Bacteria;Bacteroidetes;Bacteroidia;Cytophagales;uncultured;	0	0	0	0	0	0	0.0021	0	0	0	0
Bacteria;Bacteroidetes;Bacteroidia;Flavobacteriales;Crocinitomicaceae;Brumimicrobium;	0	0	0	0	0.0018	0	0.001	0	0	0	0
Bacteria;Bacteroidetes;Bacteroidia;Flavobacteriales;Crocinitomicaceae;Crocinitomix;	0.0136	0.0022	0.0125	0.0784	0.0009	0.0036	0.0021	0.012	0.0323	0	0.0498
Bacteria;Bacteroidetes;Bacteroidia;Flavobacteriales;Crocinitomicaceae;Fluviicola;	0.0173	0.907	0.0682	0.6378	0.0062	0.0024	0.0124	0.0017	1.395	0.0433	0.45
Bacteria;Bacteroidetes;Bacteroidia;Flavobacteriales;Crocinitomicaceae;Lishizhenia;	0	0	0	0.0115	0	0	0	0	0.0569	0	0.0102
Bacteria;Bacteroidetes;Bacteroidia;Flavobacteriales;Crocinitomicaceae;Salinirepens;	0	0.0826	0.0042	0.0438	0	0.0024	0.0041	0.0009	0.1539	0.0021	0.022
Bacteria;Bacteroidetes;Bacteroidia;Flavobacteriales;Crocinitomicaceae;uncultured;	0	0.0011	0	0	0	0	0	0	0.0026	0	0
Bacteria;Bacteroidetes;Bacteroidia;Flavobacteriales;Cryomorphaceae;Cryomorpha;	0	0	0	0	0	0	0	0	0	0.0014	0
Bacteria;Bacteroidetes;Bacteroidia;Flavobacteriales;Cryomorphaceae;Luteibaculum;	0	0	0	0.0012	0	0	0.001	0	0	0	0
Bacteria;Bacteroidetes;Bacteroidia;Flavobacteriales;Cryomorphaceae;NS10 marine group;	0.1661	0.0587	0.16	0.0877	0.1638	0.1396	0.2578	0.1044	0.172	0.1241	0.2049
Bacteria;Bacteroidetes;Bacteroidia;Flavobacteriales;Cryomorphaceae;Owenweeksia;	0.0025	0	0	0	0	0	0	0	0	0.0014	0
Bacteria;Bacteroidetes;Bacteroidia;Flavobacteriales;Cryomorphaceae;Phaeocystidibacter;	0	0	0	0.0023	0	0	0	0	0.0026	0	0
Bacteria;Bacteroidetes;Bacteroidia;Flavobacteriales;Cryomorphaceae;uncultured;	0.7547	3.7845	0.6607	2.9826	0.4369	0.7297	1.086	0.4585	3.165	5.1065	2.2404
Bacteria;Bacteroidetes;Bacteroidia;Flavobacteriales;Flavobacteriaceae;	0.0012	0.0424	0	0.0035	0.0009	0	0.001	0.0017	0.0078	0.061	0.0022
Bacteria;Bacteroidetes;Bacteroidia;Flavobacteriales;Flavobacteriaceae;Actibacter;	0.0781	0.1021	0.057	0.0715	0.0617	0.0595	0.0371	0.0488	0.1112	0.0319	0.0549
Bacteria;Bacteroidetes;Bacteroidia;Flavobacteriales;Flavobacteriaceae;Aequorivita;	0	0	0	0.0012	0	0	0.001	0	0	0.0064	0
Bacteria;Bacteroidetes;Bacteroidia;Flavobacteriales;Flavobacteriaceae;Algibacter;	0	0	0	0.0012	0	0	0	0	0	0	0.0007
Bacteria;Bacteroidetes;Bacteroidia;Flavobacteriales;Flavobacteriaceae;Aquibacter;	0.0483	0.3031	0.0389	0.7116	0.0581	0.0449	0.0464	0.0265	0.7938	0.2631	0.7236
Bacteria;Bacteroidetes;Bacteroidia;Flavobacteriales;Flavobacteriaceae;Aquimarina;	0.0694	0.1553	0.0264	0.1834	0.0819	0.0546	0.0237	0.0684	0.1913	0.0943	0.2056
Bacteria;Bacteroidetes;Bacteroidia;Flavobacteriales;Flavobacteriaceae;Arcticiflavibacter;	0	0	0.0014	0.0023	0	0	0	0	0.0013	0.0007	0.0015
Bacteria;Bacteroidetes;Bacteroidia;Flavobacteriales;Flavobacteriaceae;Aurantivirga;	0.2503	0.9613	0.1377	0.3229	0.1268	0.1287	0.131	0.0616	1.4868	0.3964	0.1449
Bacteria;Bacteroidetes;Bacteroidia;Flavobacteriales;Flavobacteriaceae;Aureimarina;	0	0	0	0	0	0.0036	0	0	0	0	0
Bacteria;Bacteroidetes;Bacteroidia;Flavobacteriales;Flavobacteriaceae;Aureisphaera;	0.0037	0.0521	0.0181	0.0415	0.0018	0.0073	0.032	0.0103	0.0724	0.0709	0.0315
Bacteria;Bacteroidetes;Bacteroidia;Flavobacteriales;Flavobacteriaceae;Bizionia;	0	0	0	0	0	0	0.0021	0	0	0.0007	0
Bacteria;Bacteroidetes;Bacteroidia;Flavobacteriales;Flavobacteriaceae;Cellulophaga;	0	0	0	0	0	0	0	0	0	0	0.0307
Bacteria;Bacteroidetes;Bacteroidia;Flavobacteriales;Flavobacteriaceae;Citreitalea;	0	0	0	0	0	0.0012	0.0021	0	0	0	0
Bacteria;Bacteroidetes;Bacteroidia;Flavobacteriales;Flavobacteriaceae;Croceitalea;	0	0	0	0	0	0	0	0.0009	0	0	0
Bacteria;Bacteroidetes;Bacteroidia;Flavobacteriales;Flavobacteriaceae;Dokdonia;	0	0	0	0	0	0	0	0.0017	0	0.0021	0
Bacteria;Bacteroidetes;Bacteroidia;Flavobacteriales;Flavobacteriaceae;Flavicella;	0.0087	0	0	0.0069	0.0009	0.0024	0	0	0.0078	0	0.011
Bacteria;Bacteroidetes;Bacteroidia;Flavobacteriales;Flavobacteriaceae;Flaviramulus;	0	0.0532	0	0.0473	0.0009	0.0012	0.0021	0	0.0233	0.0518	0.0051
Bacteria;Bacteroidetes;Bacteroidia;Flavobacteriales;Flavobacteriaceae;Flavirhabdus;	0	0	0	0	0	0	0	0	0	0	0.0007
Bacteria;Bacteroidetes;Bacteroidia;Flavobacteriales;Flavobacteriaceae;Flavobacterium;	0.0273	0.4312	0.1906	0.4556	0.0176	0.0413	0.1537	0.0736	0.8456	0.417	0.3658
Bacteria;Bacteroidetes;Bacteroidia;Flavobacteriales;Flavobacteriaceae;Formosa;	0.1611	1.0395	0.0695	1.7623	0.2308	0.1324	0.0608	0.1223	1.7299	0.8354	1.7502
Bacteria;Bacteroidetes;Bacteroidia;Flavobacteriales;Flavobacteriaceae;Gaetbulibacter;	0	0	0	0	0.0009	0	0	0	0	0	0
Bacteria;Bacteroidetes;Bacteroidia;Flavobacteriales;Flavobacteriaceae;Gelidibacter;	0	0	0	0	0.0053	0	0.0031	0	0	0	0
Bacteria;Bacteroidetes;Bacteroidia;Flavobacteriales;Flavobacteriaceae;Gillisia;	0.0012	0.0011	0.0028	0.0012	0.0026	0	0	0.0009	0.0026	0	0
Bacteria;Bacteroidetes;Bacteroidia;Flavobacteriales;Flavobacteriaceae;Gilvibacter;	0.0074	0.0358	0.0014	0.0484	0	0.0024	0	0.0103	0.0284	0.0057	0.0995
Bacteria;Bacteroidetes;Bacteroidia;Flavobacteriales;Flavobacteriaceae;Gramella;	0.0037	0.0185	0.0014	0.0161	0.0185	0.0049	0	0.0111	0.0013	0.0028	0.0132
Bacteria;Bacteroidetes;Bacteroidia;Flavobacteriales;Flavobacteriaceae;Hwangdonia;	0	0.0011	0	0	0	0.0862	0.0186	0.0488	0	0	0
Bacteria;Bacteroidetes;Bacteroidia;Flavobacteriales;Flavobacteriaceae;Imtechella;	0	0.0054	0	0	0	0	0	0	0.0013	0	0
Bacteria;Bacteroidetes;Bacteroidia;Flavobacteriales;Flavobacteriaceae;Jejuia;	0.0211	0	0.007	0	0.0854	0.0085	0.0052	0.0094	0.0013	0	0.0022
Bacteria;Bacteroidetes;Bacteroidia;Flavobacteriales;Flavobacteriaceae;Kordia;	0.0136	0.113	0.025	0	0	0.0012	0.032	0.0077	0.0634	0.222	0
Bacteria;Bacteroidetes;Bacteroidia;Flavobacteriales;Flavobacteriaceae;Kriegella;	0.0025	0.0011	0	0	0.0044	0.0036	0.0021	0.0094	0	0	0
Bacteria;Bacteroidetes;Bacteroidia;Flavobacteriales;Flavobacteriaceae;Lacinutrix;	0	0	0	0	0.0009	0	0	0	0	0	0
Bacteria;Bacteroidetes;Bacteroidia;Flavobacteriales;Flavobacteriaceae;Lutibacter;	0.0744	0.4215	0.2782	0.2526	0.0784	0.0899	0.1104	0.0847	0.746	0.1567	0.2941
Bacteria;Bacteroidetes;Bacteroidia;Flavobacteriales;Flavobacteriaceae;Maritimimonas;	0	0.0087	0.007	0.0115	0.0018	0.0036	0.001	0.0043	0.0233	0	0.0095
Bacteria;Bacteroidetes;Bacteroidia;Flavobacteriales;Flavobacteriaceae;Marixanthomonas;	0	0	0	0	0	0	0	0	0	0	0.0015
Bacteria;Bacteroidetes;Bacteroidia;Flavobacteriales;Flavobacteriaceae;Myroides;	0	0.0043	0	0.0104	0	0	0.0062	0	0.0013	0.0014	0.0344
Bacteria;Bacteroidetes;Bacteroidia;Flavobacteriales;Flavobacteriaceae;NS2b marine group;	0.7361	0.05	0.0918	0.2422	0.6993	0.635	0.2568	0.4798	0.1358	0.0184	0.3197
Bacteria;Bacteroidetes;Bacteroidia;Flavobacteriales;Flavobacteriaceae;NS3a marine group;	0.005	0.1021	0.0111	0.0888	0.0062	0.0024	0.0113	0.0231	0.0207	0.7361	0.0615
Bacteria;Bacteroidetes;Bacteroidia;Flavobacteriales;Flavobacteriaceae;NS4 marine group;	0.5465	1.5457	0.7372	1.8892	1.4973	0.8718	1.1386	1.242	1.5838	0.6872	1.4985
Bacteria;Bacteroidetes;Bacteroidia;Flavobacteriales;Flavobacteriaceae;NS5 marine group;	3.1526	3.161	1.8054	4.407	2.8476	2.1868	1.4955	2.1905	2.9077	1.0332	3.4763
Bacteria;Bacteroidetes;Bacteroidia;Flavobacteriales;Flavobacteriaceae;Nonlabens;	0.0012	0	0	0	0	0	0	0.0068	0.0013	0	0
Bacteria;Bacteroidetes;Bacteroidia;Flavobacteriales;Flavobacteriaceae;Olleya;	0	0.0619	0.0083	0.0369	0.0123	0.0036	0.0021	0.006	0.0375	0.0589	0.0505
Bacteria;Bacteroidetes;Bacteroidia;Flavobacteriales;Flavobacteriaceae;Pibocella;	0	0	0	0	0	0	0	0	0	0	0.0102
Bacteria;Bacteroidetes;Bacteroidia;Flavobacteriales;Flavobacteriaceae;Polaribacter 1;	1.8725	5.819	1.6051	0.4567	1.1248	1.9209	0.8911	1.1308	1.9678	8.3722	0.4339
Bacteria;Bacteroidetes;Bacteroidia;Flavobacteriales;Flavobacteriaceae;Polaribacter 2;	0.0136	0.0076	0	0.0115	0.0062	0	0.0124	0	0.0026	0.0156	0.008
Bacteria;Bacteroidetes;Bacteroidia;Flavobacteriales;Flavobacteriaceae;Polaribacter 3;	0.1648	0.6974	0.2114	0.1557	0.1198	0.2016	0.1269	0.1026	0.2702	0.9595	0.1002
Bacteria;Bacteroidetes;Bacteroidia;Flavobacteriales;Flavobacteriaceae;Polaribacter 4;	0.0099	0.0228	0.0264	0.0208	0.0828	0.0219	0.033	0.0282	0.0711	0.0064	0.0154
Bacteria;Bacteroidetes;Bacteroidia;Flavobacteriales;Flavobacteriaceae;Polaribacter;	0.1029	0.315	0.0946	0.0784	0.0837	0.1299	0.034	0.0667	0.1099	0.2886	0.0315
Bacteria;Bacteroidetes;Bacteroidia;Flavobacteriales;Flavobacteriaceae;Postechiella;	0	0	0	0	0	0.0036	0	0.0009	0	0.0014	0
Bacteria;Bacteroidetes;Bacteroidia;Flavobacteriales;Flavobacteriaceae;Pseudofulvibacter;	0	0.0054	0.0014	0.1292	0.0018	0	0	0	0.0013	0	0.0519
Bacteria;Bacteroidetes;Bacteroidia;Flavobacteriales;Flavobacteriaceae;Psychroflexus;	0	0.0033	0	0.0069	0.0009	0.0012	0.001	0	0	0.0007	0.0029
Bacteria;Bacteroidetes;Bacteroidia;Flavobacteriales;Flavobacteriaceae;Psychroserpens;	0.005	0	0	0.0208	0.0009	0.0024	0.0021	0.006	0.0026	0	0.008
Bacteria;Bacteroidetes;Bacteroidia;Flavobacteriales;Flavobacteriaceae;Salinimicrobium;	0	0.0402	0.0125	0.0392	0	0.0085	0.001	0.006	0.0595	0.0177	0.0307
Bacteria;Bacteroidetes;Bacteroidia;Flavobacteriales;Flavobacteriaceae;Subsaxibacter;	0	0.0065	0	0.0242	0.0018	0	0	0	0.0194	0.0043	0.0102
Bacteria;Bacteroidetes;Bacteroidia;Flavobacteriales;Flavobacteriaceae;Tamlana;	0.0012	0	0	0.0012	0	0.0012	0	0	0	0	0.0037
Bacteria;Bacteroidetes;Bacteroidia;Flavobacteriales;Flavobacteriaceae;Tenacibaculum;	0.1041	0.3194	0.0376	0.1073	0.0476	0.0437	0.0474	0.0291	0.5042	0.1432	0.0549
Bacteria;Bacteroidetes;Bacteroidia;Flavobacteriales;Flavobacteriaceae;Ulvibacter;	0.0582	0.7821	0.4479	0.6678	0.0229	0.0704	0.3641	0.1788	1.0744	1.0566	0.6066
Bacteria;Bacteroidetes;Bacteroidia;Flavobacteriales;Flavobacteriaceae;Wenyingzhuangia;	0	0	0	0.0381	0	0	0	0	0	0.0057	0.0117
Bacteria;Bacteroidetes;Bacteroidia;Flavobacteriales;Flavobacteriaceae;Winogradskyella;	0.1029	0.1999	0.0167	0.2387	0.0493	0.0352	0.0206	0.0385	0.2676	0.1354	0.2429
Bacteria;Bacteroidetes;Bacteroidia;Flavobacteriales;Flavobacteriaceae;Xanthomarina;	0.005	0.0597	0.0278	0.0715	0.0009	0.0073	0.034	0.0154	0.0737	0.1035	0.0476
Bacteria;Bacteroidetes;Bacteroidia;Flavobacteriales;Flavobacteriaceae;[Polaribacter] huanghezhanensis;	0.1301	0.4823	0.1474	0.1811	0.1101	0.1578	0.1124	0.0967	0.3917	0.5801	0.1185
Bacteria;Bacteroidetes;Bacteroidia;Flavobacteriales;Flavobacteriaceae;uncultured;	0.2255	2.8014	0.491	2.7658	0.1506	0.2319	0.2764	0.3062	5.2078	0.9481	2.1409
Bacteria;Bacteroidetes;Bacteroidia;Flavobacteriales;NS7 marine group;	0.0322	0.0684	0.0459	0.4129	0.1154	0.0559	0.0423	0.0462	0.1888	0.0262	0.7149
Bacteria;Bacteroidetes;Bacteroidia;Flavobacteriales;NS9 marine group;	2.4214	4.698	3.0822	2.0322	1.8919	1.9379	3.3313	1.6209	4.9479	3.3621	1.7202
Bacteria;Bacteroidetes;Bacteroidia;Flavobacteriales;Weeksellaceae;Chryseobacterium;	0	0	0	0	0.0009	0.0024	0	0	0.0026	0	0
Bacteria;Bacteroidetes;Bacteroidia;Flavobacteriales;Weeksellaceae;Cloacibacterium;	0	0.0011	0	0.0046	0.0009	0	0	0	0	0	0.0007
Bacteria;Bacteroidetes;Bacteroidia;Flavobacteriales;Weeksellaceae;Moheibacter;	0	0.0011	0	0	0	0	0	0	0	0	0
Bacteria;Bacteroidetes;Bacteroidia;Flavobacteriales;Weeksellaceae;Ornithobacterium;	0	0.013	0.0056	0.0415	0.007	0.0097	0	0.0086	0.0194	0	0.038
Bacteria;Bacteroidetes;Bacteroidia;Sphingobacteriales;	0	0	0	0	0	0	0	0	0	0	0.0007
Bacteria;Bacteroidetes;Bacteroidia;Sphingobacteriales;Lentimicrobiaceae;	0	0	0	0	0.0018	0.0049	0	0	0.0013	0	0.0007
Bacteria;Bacteroidetes;Bacteroidia;Sphingobacteriales;NS11-12 marine group;	0.005	0.3519	0.0376	0.2249	0.0062	0	0.0052	0.0103	0.181	0.1461	0.1002
Bacteria;Bacteroidetes;Bacteroidia;Sphingobacteriales;ST-12K33;	0	0	0	0	0.0009	0	0	0	0	0	0
Bacteria;Bacteroidetes;Bacteroidia;Sphingobacteriales;Sphingobacteriaceae;Pedobacter;	0	0.0011	0	0.0012	0	0	0	0	0	0	0.0037
Bacteria;Bacteroidetes;Ignavibacteria;Ignavibacteriales;Melioribacteraceae;IheB3-7;	0	0	0.0014	0	0	0	0	0	0	0	0
Bacteria;Bacteroidetes;Ignavibacteria;Kryptoniales;BSV26;	0	0	0	0	0	0	0	0	0	0	0.0007
Bacteria;Bacteroidetes;Ignavibacteria;OPB56;	0	0	0	0.0023	0	0	0	0	0	0	0
Bacteria;Bacteroidetes;Rhodothermia;Balneolales;Balneolaceae;ML310M-34;	0	0	0	0	0	0	0	0	0.0026	0	0
Bacteria;Bacteroidetes;Rhodothermia;Rhodothermales;Rhodothermaceae;uncultured;	0	0.0043	0.0125	0	0.0035	0	0	0.0017	0.0091	0	0
Bacteria;Chlamydiae;Chlamydiae;Chlamydiales;Chlamydiaceae;uncultured;	0	0	0.0014	0	0.0018	0	0.001	0	0	0	0
Bacteria;Chlamydiae;Chlamydiae;Chlamydiales;Criblamydiaceae;	0	0	0	0	0.0009	0	0	0	0	0	0
Bacteria;Chlamydiae;Chlamydiae;Chlamydiales;Criblamydiaceae;uncultured;	0	0	0	0	0.0026	0	0	0	0	0	0
Bacteria;Chlamydiae;Chlamydiae;Chlamydiales;Parachlamydiaceae;	0.0012	0	0	0	0	0	0	0.0009	0	0	0
Bacteria;Chlamydiae;Chlamydiae;Chlamydiales;Parachlamydiaceae;Neochlamydia;	0.0012	0	0	0	0	0	0	0	0	0	0
Bacteria;Chlamydiae;Chlamydiae;Chlamydiales;Parachlamydiaceae;uncultured;	0	0	0	0	0.0009	0	0	0	0	0	0
Bacteria;Chlamydiae;Chlamydiae;Chlamydiales;Simkaniaceae;Simkania;	0	0	0	0	0	0	0.001	0	0	0	0
Bacteria;Chlamydiae;Chlamydiae;Chlamydiales;Simkaniaceae;uncultured;	0.0025	0	0	0	0.0018	0	0	0.0009	0	0	0
Bacteria;Chlamydiae;Chlamydiae;Chlamydiales;cvE6;	0	0	0	0	0	0	0.001	0	0	0	0
Bacteria;Chloroflexi;Anaerolineae;Anaerolineales;Anaerolineaceae;uncultured;	0	0	0.0014	0	0	0.0024	0	0.0017	0	0	0
Bacteria;Chloroflexi;Anaerolineae;C10-SB1A;	0	0	0.0014	0	0	0	0	0	0	0	0
Bacteria;Chloroflexi;Dehalococcoidia;MSBL5;	0	0	0	0	0	0	0.001	0	0	0	0
Bacteria;Chloroflexi;Dehalococcoidia;S085;	0	0	0.0014	0	0.0026	0.0073	0.0072	0	0	0	0
Bacteria;Chloroflexi;Dehalococcoidia;SAR202 clade;	0.1004	0.013	0.2406	0	0.3074	0.1785	0.2413	0.0727	0.0026	0.0071	0.0044
Bacteria;Chloroflexi;JG30-KF-CM66;	0.0149	0.0011	0.0376	0	0.037	0.034	0.0299	0.012	0.0052	0.0014	0
Bacteria;Chloroflexi;KD4-96;	0	0	0.0028	0	0	0	0	0	0	0	0
Bacteria;Chloroflexi;N9D0;	0	0	0	0	0	0	0.001	0	0	0	0
Bacteria;Chloroflexi;TK17;	0	0	0.0014	0	0	0	0	0	0	0	0
Bacteria;Cyanobacteria;Oxyphotobacteria;Chloroplast;	7.3535	5.8907	7.9198	16.0825	7.1467	14.0389	6.0169	14.8616	5.3565	14.2439	21.8907
Bacteria;Cyanobacteria;Oxyphotobacteria;Nostocales;Nostocaceae;Aphanizomenon MDT14a;	0.0012	0	0	0	0	0	0	0	0	0	0
Bacteria;Cyanobacteria;Oxyphotobacteria;Nostocales;Nostocaceae;uncultured;	0	0	0	0.0012	0	0.0012	0	0	0	0	0.0007
Bacteria;Cyanobacteria;Oxyphotobacteria;Nostocales;Phormidiaceae;Planktothrix NIVA-CYA 15;	0	0	0	0	0	0	0	0.0009	0	0	0
Bacteria;Cyanobacteria;Oxyphotobacteria;Nostocales;uncultured;	0	0	0	0	0	0	0.001	0	0	0	0.0022
Bacteria;Cyanobacteria;Oxyphotobacteria;Oxyphotobacteria Incertae Sedis;Unknown Family;Leptolyngbya ANT.L52.2;	0.0012	0	0	0	0	0	0	0	0	0	0
Bacteria;Cyanobacteria;Oxyphotobacteria;Oxyphotobacteria Incertae Sedis;Unknown Family;Leptolyngbya EcFYyyy-00;	0.0012	0	0	0	0	0	0	0.0009	0	0	0
Bacteria;Cyanobacteria;Oxyphotobacteria;Synechococcales;Cyanobiaceae;Cyanobium PCC-6307;	0	0	0	0.0081	0	0	0	0	0.0013	0	0.019
Bacteria;Cyanobacteria;Oxyphotobacteria;Synechococcales;Cyanobiaceae;Prochlorococcus MIT9313;	0	0	0	0	0	0	0	0.0009	0	0	0
Bacteria;Cyanobacteria;Oxyphotobacteria;Synechococcales;Cyanobiaceae;Synechococcus CC9902;	0	0.0011	0	0.0369	0	0	0	0	0.0078	0	0.0549
Bacteria;Dadabacteria;Dadabacteriia;Dadabacteriales;	0.0756	0	0.0751	0	0.1233	0.0789	0.1031	0.0642	0	0.0092	0
Bacteria;Deinococcus-Thermus;Deinococci;Deinococcales;Deinococcaceae;Deinococcus;	0	0	0	0	0	0	0	0	0	0	0.0007
Bacteria;Dependentiae;Babeliae;Babeliales;Babeliaceae;	0	0	0	0	0	0	0.0021	0	0	0	0
Bacteria;Epsilonbacteraeota;Campylobacteria;Campylobacterales;Arcobacteraceae;Arcobacter;	0.0012	0.0054	0.0083	0.0196	0.0026	0	0	0.0043	0.0168	0	0.0139
Bacteria;Epsilonbacteraeota;Campylobacteria;Campylobacterales;Helicobacteraceae;Helicobacter;	0	0	0	0	0	0	0	0	0	0	0.0059
Bacteria;Epsilonbacteraeota;Campylobacteria;Campylobacterales;Sulfurovaceae;Nitratifractor;	0	0	0	0	0	0.0012	0	0	0	0	0
Bacteria;Epsilonbacteraeota;Campylobacteria;Campylobacterales;Sulfurovaceae;Sulfurovum;	0	0	0	0.0012	0	0	0	0	0.0039	0	0
Bacteria;Epsilonbacteraeota;Campylobacteria;Campylobacterales;Thiovulaceae;Sulfurimonas;	0	0	0	0	0.0026	0	0	0	0	0.0014	0.0007
Bacteria;Epsilonbacteraeota;Campylobacteria;Campylobacterales;uncultured;	0	0	0	0	0	0	0	0.0009	0	0	0
Bacteria;FBP;	0.0012	0	0	0	0	0	0	0	0	0	0
Bacteria;Fibrobacteres;Fibrobacteria;Fibrobacterales;Fibrobacteraceae;Fibrobacter;	0	0	0	0.0035	0	0	0	0	0.0013	0	0
Bacteria;Fibrobacteres;Fibrobacteria;Fibrobacterales;Fibrobacteraceae;possible genus 04;	0	0.0011	0	0	0	0	0	0	0	0	0
Bacteria;Fibrobacteres;Fibrobacteria;Fibrobacterales;Fibrobacteraceae;uncultured;	0	0.0358	0.0056	0.3299	0	0	0.001	0	0.2495	0	0.2919
Bacteria;Firmicutes;Bacilli;Bacillales;Staphylococcaceae;Staphylococcus;	0.0012	0.0011	0	0	0.0009	0	0	0	0.0013	0	0
Bacteria;Firmicutes;Bacilli;Lactobacillales;Lactobacillaceae;Lactobacillus;	0	0	0	0	0	0	0.0021	0	0	0	0
Bacteria;Firmicutes;Bacilli;Lactobacillales;Streptococcaceae;Streptococcus;	0	0	0	0	0	0	0	0	0.0013	0.0007	0
Bacteria;Firmicutes;Clostridia;Clostridiales;Family XIII;Family XIII AD3011 group;	0.0012	0	0	0	0	0	0	0	0	0	0
Bacteria;Firmicutes;Clostridia;Clostridiales;Lachnospiraceae;Anaerostipes;	0.0012	0	0	0	0	0	0	0	0	0	0
Bacteria;Firmicutes;Clostridia;Clostridiales;Lachnospiraceae;Catonella;	0	0	0	0	0	0	0	0	0	0.0007	0
Bacteria;Firmicutes;Clostridia;Clostridiales;Lachnospiraceae;Lachnospiraceae AC2044 group;	0	0	0	0.0012	0	0	0	0	0	0	0
Bacteria;Firmicutes;Clostridia;Clostridiales;Lachnospiraceae;Lachnospiraceae UCG-001;	0.0012	0	0	0	0	0	0	0	0	0	0
Bacteria;Firmicutes;Clostridia;Clostridiales;Peptococcaceae;Desulfosporosinus;	0	0	0	0	0.0018	0	0	0	0	0	0
Bacteria;Firmicutes;Clostridia;Clostridiales;Ruminococcaceae;Faecalibacterium;	0	0	0	0	0.0018	0	0	0	0	0	0
Bacteria;Firmicutes;Clostridia;Clostridiales;Ruminococcaceae;Oscillibacter;	0	0	0	0	0	0	0	0	0	0	0.0007
Bacteria;Firmicutes;Clostridia;Clostridiales;Ruminococcaceae;Ruminiclostridium 9;	0.0025	0	0	0	0	0	0	0	0	0	0
Bacteria;Firmicutes;Clostridia;Clostridiales;Ruminococcaceae;Ruminococcaceae UCG-005;	0.0012	0.0022	0.007	0	0	0	0.0021	0.0009	0	0	0.0015
Bacteria;Firmicutes;Clostridia;Clostridiales;Ruminococcaceae;uncultured;	0.0012	0	0	0	0	0	0	0	0	0.0007	0.0007
Bacteria;Firmicutes;Erysipelotrichia;Erysipelotrichales;Erysipelotrichaceae;Candidatus Stoquefichus;	0	0	0	0.0012	0	0	0	0	0	0	0
Bacteria;Fusobacteria;Fusobacteriia;Fusobacteriales;Fusobacteriaceae;Fusobacterium;	0	0	0.0028	0	0	0	0	0	0	0	0.0029
Bacteria;Gemmatimonadetes;AKAU4049;	0	0	0.0042	0	0	0	0.001	0	0	0	0
Bacteria;Gemmatimonadetes;BD2-11 terrestrial group;	0.026	0	0.0918	0	0.0625	0.0158	0.0433	0.0197	0	0	0
Bacteria;Hydrogenedentes;Hydrogenedentia;Hydrogenedentiales;Hydrogenedensaceae;	0	0	0	0.0012	0	0	0	0	0	0.0035	0.0007
Bacteria;Kiritimatiellaeota;Kiritimatiellae;WCHB1-41;	0	0	0.0028	0	0.0018	0	0	0	0	0.0007	0
Bacteria;Latescibacteria;	0	0	0	0	0.0009	0	0	0	0	0	0
Bacteria;Lentisphaerae;Lentisphaeria;Lentisphaerales;Lentisphaeraceae;Lentisphaera;	0.0136	0	0.0014	0.0277	0.0018	0.0085	0.0021	0	0.0039	0	0.0183
Bacteria;Lentisphaerae;Lentisphaeria;Victivallales;Arctic95B-14;	0	0	0.0014	0	0.0062	0.0012	0	0	0	0	0
Bacteria;Lentisphaerae;Lentisphaeria;Victivallales;BD2-3;	0	0	0	0	0	0	0	0	0.0013	0	0.0007
Bacteria;Lentisphaerae;Oligosphaeria;P.palmC41;	0	0	0	0	0	0	0	0	0.0026	0	0
Bacteria;Margulisbacteria;	0.0074	0.0011	0.0529	0	0.0035	0.0036	0.0227	0	0	0	0
Bacteria;Marinimicrobia (SAR406 clade);	0.4697	0.0478	0.7664	0.0369	0.8077	0.4918	1.0592	0.3994	0.0388	0.0121	0.0717
Bacteria;Nitrospinae;Nitrospinia;Nitrospinales;Nitrospinaceae;LS-NOB;	0.1177	0.0054	0.1836	0.0127	0.2748	0.1469	0.1784	0.0676	0.0091	0	0.0183
Bacteria;Nitrospinae;Nitrospinia;Nitrospinales;Nitrospinaceae;Nitrospina;	0.1834	0.0282	0.1989	0.0358	0.2352	0.1663	0.1733	0.0872	0.0349	0.0106	0.0212
Bacteria;Nitrospinae;P9X2b3D02;	0.0037	0	0.0097	0	0.0009	0.0109	0.0031	0.0026	0	0	0
Bacteria;Nitrospirae;Nitrospira;Nitrospirales;Nitrospiraceae;Nitrospira;	0	0	0.0056	0	0.0009	0	0	0	0	0	0
Bacteria;Omnitrophicaeota;	0	0	0	0	0	0	0	0	0.0013	0	0
Bacteria;PAUC34f;	0.0074	0.0022	0.0515	0	0.0379	0.0182	0.0299	0.0231	0.0052	0	0
Bacteria;Patescibacteria;ABY1;Candidatus Kerfeldbacteria;	0	0	0	0	0	0.0024	0	0	0	0	0
Bacteria;Patescibacteria;ABY1;Candidatus Komeilibacteria;	0	0	0	0	0.0018	0	0	0	0	0	0
Bacteria;Patescibacteria;ABY1;Candidatus Kuenenbacteria;	0	0	0	0	0	0	0	0.0034	0	0	0
Bacteria;Patescibacteria;ABY1;Candidatus Magasanikbacteria;	0	0	0	0	0.0018	0	0	0	0	0	0
Bacteria;Patescibacteria;Gracilibacteria;	0	0	0.0014	0	0	0	0.001	0	0	0	0
Bacteria;Patescibacteria;Gracilibacteria;Absconditabacteriales (SR1);	0	0	0	0	0	0	0	0.0017	0	0	0
Bacteria;Patescibacteria;Gracilibacteria;Candidatus Peregrinibacteria;	0	0	0.0014	0	0	0	0.001	0	0	0	0
Bacteria;Patescibacteria;Gracilibacteria;Candidatus Peribacteria;	0.0012	0	0.0056	0	0	0.0049	0.0021	0	0	0	0
Bacteria;Patescibacteria;Gracilibacteria;JGI 0000069-P22;	0.0074	0.0065	0	0.0035	0.007	0.0024	0	0.0051	0.0207	0.0007	0.0007
Bacteria;Patescibacteria;Parcubacteria;Candidatus Campbellbacteria;	0	0	0	0	0	0	0	0	0	0.0014	0
Bacteria;Patescibacteria;Parcubacteria;Candidatus Kaiserbacteria;	0	0	0	0	0	0.0012	0.001	0	0	0	0
Bacteria;Patescibacteria;Saccharimonadia;Saccharimonadales;	0.0025	0	0	0	0	0	0	0.0017	0	0	0
Bacteria;Planctomycetes;BD7-11;	0.0112	0.0054	0.0042	0.0208	0	0.0024	0.033	0	0.0052	0	0.0015
Bacteria;Planctomycetes;OM190;	0.0186	0	0.0362	0.0092	0.0388	0.0279	0.0526	0.0043	0.0052	0.0007	0.0161
Bacteria;Planctomycetes;Phycisphaerae;MSBL9;L21-RPul-D3;	0.0012	0	0	0	0	0.0012	0	0	0.0013	0.0043	0.0022
Bacteria;Planctomycetes;Phycisphaerae;MSBL9;SM23-30;	0	0	0	0	0	0	0	0.0009	0.0039	0	0
Bacteria;Planctomycetes;Phycisphaerae;Phycisphaerales;Phycisphaeraceae;CL500-3;	0.0112	0.0076	0.0083	0.0242	0.0035	0.0049	0.0103	0.0137	0.0091	0	0.0154
Bacteria;Planctomycetes;Phycisphaerae;Phycisphaerales;Phycisphaeraceae;FS140-16B-02 marine group;	0.005	0.0011	0.0125	0	0.007	0.0061	0.0124	0.0051	0.0078	0	0.0029
Bacteria;Planctomycetes;Phycisphaerae;Phycisphaerales;Phycisphaeraceae;JL-ETNP-F27;	0.0087	0.0011	0.0389	0.0012	0.0423	0.0255	0.0464	0.0145	0	0.0028	0.0015
Bacteria;Planctomycetes;Phycisphaerae;Phycisphaerales;Phycisphaeraceae;Urania-1B-19 marine sediment group;	0.0025	0	0	0.0012	0	0	0.001	0	0	0	0.0015
Bacteria;Planctomycetes;Phycisphaerae;Phycisphaerales;Phycisphaeraceae;uncultured;	0	0	0	0	0	0	0.0021	0	0	0	0
Bacteria;Planctomycetes;Pla3 lineage;	0	0	0.0014	0	0.0018	0	0	0	0	0	0
Bacteria;Planctomycetes;Planctomycetacia;Pirellulales;Pirellulaceae;Blastopirellula;	0.005	0	0.0111	0	0.0352	0.0036	0.0083	0.0017	0	0	0
Bacteria;Planctomycetes;Planctomycetacia;Pirellulales;Pirellulaceae;Pir4 lineage;	0.0037	0.0011	0.0028	0	0	0	0	0	0	0	0
Bacteria;Planctomycetes;Planctomycetacia;Pirellulales;Pirellulaceae;Rhodopirellula;	0.026	0	0.0125	0	0.0599	0.0049	0.0144	0.0077	0.0013	0	0.0029
Bacteria;Planctomycetes;Planctomycetacia;Pirellulales;Pirellulaceae;Rubripirellula;	0	0	0.0056	0	0.0062	0	0	0	0	0	0
Bacteria;Planctomycetes;Planctomycetacia;Pirellulales;Pirellulaceae;uncultured;	0.0062	0	0.0209	0.0035	0.0079	0.0085	0.0083	0.0043	0.0052	0.0014	0.0007
Bacteria;Planctomycetes;Planctomycetacia;Planctomycetales;Gimesiaceae;Gimesia;	0.0012	0	0	0	0.0009	0	0	0	0	0	0
Bacteria;Planctomycetes;Planctomycetacia;Planctomycetales;Gimesiaceae;uncultured;	0.0087	0.0022	0.0167	0	0.0211	0.0061	0.0062	0.0009	0.0026	0	0
Bacteria;Planctomycetes;Planctomycetacia;Planctomycetales;Rubinisphaeraceae;Fuerstia;	0	0	0	0	0.0026	0	0	0	0	0	0
Bacteria;Planctomycetes;Planctomycetacia;Planctomycetales;Rubinisphaeraceae;uncultured;	0	0	0.0111	0	0.0079	0	0	0	0	0	0
Bacteria;Planctomycetes;Planctomycetacia;Planctomycetales;uncultured;	0.005	0	0	0	0	0.0024	0.0041	0	0	0	0
Bacteria;Proteobacteria;Alphaproteobacteria;Acetobacterales;Acetobacteraceae;Roseomonas;	0	0	0	0	0	0	0.0021	0	0	0	0
Bacteria;Proteobacteria;Alphaproteobacteria;Acetobacterales;Acetobacterales Incertae Sedis;uncultured;	0	0	0	0	0.0079	0.0085	0	0	0	0	0
Bacteria;Proteobacteria;Alphaproteobacteria;Alphaproteobacteria Incertae Sedis;Unknown Family;uncultured;	0	0	0	0	0.0009	0	0	0	0	0	0.0007
Bacteria;Proteobacteria;Alphaproteobacteria;Azospirillales;Azospirillaceae;Skermanella;	0	0	0	0	0	0	0	0	0	0.0007	0
Bacteria;Proteobacteria;Alphaproteobacteria;Caulobacterales;Caulobacteraceae;Brevundimonas;	0	0	0	0.0012	0	0	0	0	0	0	0
Bacteria;Proteobacteria;Alphaproteobacteria;Caulobacterales;Caulobacteraceae;Caulobacter;	0.0012	0.0011	0	0	0	0	0	0	0	0	0
Bacteria;Proteobacteria;Alphaproteobacteria;Caulobacterales;Caulobacteraceae;uncultured;	0.0012	0	0	0	0	0	0	0	0	0.0007	0
Bacteria;Proteobacteria;Alphaproteobacteria;Caulobacterales;Hyphomonadaceae;Hirschia;	0	0	0	0	0	0	0	0	0	0	0.0007
Bacteria;Proteobacteria;Alphaproteobacteria;Caulobacterales;Hyphomonadaceae;Hyphomonas;	0	0.0011	0	0	0	0	0	0	0	0	0
Bacteria;Proteobacteria;Alphaproteobacteria;Caulobacterales;Hyphomonadaceae;Maricaulis;	0.0037	0	0	0	0	0.0012	0.001	0	0	0	0
Bacteria;Proteobacteria;Alphaproteobacteria;Caulobacterales;Hyphomonadaceae;Oceanicaulis;	0	0	0	0	0	0.0012	0.001	0	0	0	0
Bacteria;Proteobacteria;Alphaproteobacteria;Caulobacterales;Hyphomonadaceae;Ponticaulis;	0	0	0	0	0	0.0024	0	0	0	0	0
Bacteria;Proteobacteria;Alphaproteobacteria;Caulobacterales;Parvularculaceae;Amphiplicatus;	0	0	0	0.0092	0	0	0	0	0	0	0
Bacteria;Proteobacteria;Alphaproteobacteria;Dongiales;Dongiaceae;Dongia;	0	0	0.0014	0	0	0	0	0	0	0	0
Bacteria;Proteobacteria;Alphaproteobacteria;Elsterales;uncultured;	0	0	0	0	0.0018	0	0	0	0	0	0
Bacteria;Proteobacteria;Alphaproteobacteria;Holosporales;Holosporaceae;Candidatus Gortzia;	0	0	0	0	0.0026	0	0	0.0017	0	0.0028	0
Bacteria;Proteobacteria;Alphaproteobacteria;Holosporales;Holosporaceae;Holospora;	0.0025	0.0011	0	0	0.0018	0	0	0	0	0.0014	0
Bacteria;Proteobacteria;Alphaproteobacteria;Holosporales;Holosporaceae;uncultured;	0	0	0	0	0	0	0.001	0	0	0	0
Bacteria;Proteobacteria;Alphaproteobacteria;Kordiimonadales;Kordiimonadaceae;Kordiimonas;	0	0	0.0097	0	0.0018	0	0	0	0	0.0007	0
Bacteria;Proteobacteria;Alphaproteobacteria;Kordiimonadales;uncultured;	0.0124	0.4149	0.0181	0.2134	0.0846	0.0134	0.0083	0.0145	0.437	0.0177	0.1412
Bacteria;Proteobacteria;Alphaproteobacteria;Micavibrionales;Micavibrionaceae;uncultured;	0	0.0054	0.007	0	0	0	0	0	0.0026	0.0021	0
Bacteria;Proteobacteria;Alphaproteobacteria;Micavibrionales;uncultured;	0	0.0022	0.0014	0	0	0	0	0	0	0.0028	0
Bacteria;Proteobacteria;Alphaproteobacteria;NRL2;	0	0	0	0	0.0009	0	0.001	0	0	0	0
Bacteria;Proteobacteria;Alphaproteobacteria;Paracaedibacterales;Paracaedibacteraceae;uncultured;	0	0	0	0	0.0009	0	0	0	0	0	0.0029
Bacteria;Proteobacteria;Alphaproteobacteria;Parvibaculales;OCS116 clade;	0.1016	0.0619	0.1363	0.4244	0.3092	0.1421	0.2135	0.1035	0.0827	0.0284	0.3029
Bacteria;Proteobacteria;Alphaproteobacteria;Parvibaculales;PS1 clade;	0.0297	0.0065	0.0431	0.0957	0.0255	0.0182	0.066	0.0436	0.0091	0.0156	0.0724
Bacteria;Proteobacteria;Alphaproteobacteria;Parvibaculales;Parvibaculaceae;Parvibaculum;	0.0012	0.0011	0	0.0046	0.0009	0	0.0052	0.0009	0	0	0.0059
Bacteria;Proteobacteria;Alphaproteobacteria;Parvibaculales;Parvibaculaceae;Tepidicaulis;	0	0	0	0	0	0	0.0031	0	0	0	0
Bacteria;Proteobacteria;Alphaproteobacteria;Parvibaculales;Parvibaculaceae;uncultured;	0.0124	0	0.0042	0	0.0722	0.0194	0.034	0.0316	0	0	0
Bacteria;Proteobacteria;Alphaproteobacteria;Puniceispirillales;EF100-94H03;	0	0.0011	0.0083	0.0012	0.0185	0.0109	0.0021	0.0282	0	0.0071	0.0007
Bacteria;Proteobacteria;Alphaproteobacteria;Puniceispirillales;Puniceispirillales Incertae Sedis;Constrictibacter;	0	0	0	0	0.0009	0	0	0	0	0	0
Bacteria;Proteobacteria;Alphaproteobacteria;Puniceispirillales;SAR116 clade;	1.1661	0.5725	0.6954	0.9527	1.0314	1.1389	0.5961	1.4378	0.3905	0.9056	1.11
Bacteria;Proteobacteria;Alphaproteobacteria;Puniceispirillales;SAR116 clade;Candidatus Puniceispirillum;	0	0	0	0.0081	0.0009	0.0012	0.0031	0	0	0	0.0139
Bacteria;Proteobacteria;Alphaproteobacteria;Puniceispirillales;uncultured;	0.005	0.0011	0	0	0.0141	0.0073	0.0021	0.0128	0	0.0028	0
Bacteria;Proteobacteria;Alphaproteobacteria;Rhizobiales;Beijerinckiaceae;Bosea;	0	0	0	0	0	0	0.0021	0	0	0	0
Bacteria;Proteobacteria;Alphaproteobacteria;Rhizobiales;Beijerinckiaceae;uncultured;	0	0	0	0	0	0.0012	0.0031	0	0	0	0
Bacteria;Proteobacteria;Alphaproteobacteria;Rhizobiales;D05-2;	0	0	0	0	0.0018	0	0	0	0	0	0
Bacteria;Proteobacteria;Alphaproteobacteria;Rhizobiales;Devosiaceae;Devosia;	0.0025	0	0.0083	0	0.0106	0.0024	0.0072	0.0077	0.0013	0.0007	0
Bacteria;Proteobacteria;Alphaproteobacteria;Rhizobiales;Hyphomicrobiaceae;Filomicrobium;	0.0012	0	0	0	0	0	0	0	0	0	0
Bacteria;Proteobacteria;Alphaproteobacteria;Rhizobiales;Hyphomicrobiaceae;Hyphomicrobium;	0	0.0054	0	0	0.0018	0.0024	0.0031	0.0009	0.0052	0	0
Bacteria;Proteobacteria;Alphaproteobacteria;Rhizobiales;Hyphomicrobiaceae;Pedomicrobium;	0.0074	0.0196	0.0167	0.0081	0.0282	0.0146	0.0309	0.0385	0.0246	0.0234	0.0022
Bacteria;Proteobacteria;Alphaproteobacteria;Rhizobiales;Hyphomicrobiaceae;uncultured;	0.005	0	0	0	0	0	0	0	0	0	0.0022
Bacteria;Proteobacteria;Alphaproteobacteria;Rhizobiales;KF-JG30-B3;	0	0	0.0306	0	0.0317	0.0012	0.0165	0.0077	0	0	0
Bacteria;Proteobacteria;Alphaproteobacteria;Rhizobiales;Kaistiaceae;Kaistia;	0	0	0	0	0.0009	0	0	0	0	0	0
Bacteria;Proteobacteria;Alphaproteobacteria;Rhizobiales;Labraceae;Labrys;	0.0012	0	0.0014	0	0.0009	0.0012	0	0.0043	0	0	0.0007
Bacteria;Proteobacteria;Alphaproteobacteria;Rhizobiales;Lutibaculaceae;Lutibaculum;	0.0012	0	0	0	0.0018	0	0	0	0	0	0
Bacteria;Proteobacteria;Alphaproteobacteria;Rhizobiales;Methyloligellaceae;Methyloceanibacter;	0.0012	0	0	0.0012	0	0	0	0	0	0	0
Bacteria;Proteobacteria;Alphaproteobacteria;Rhizobiales;Methyloligellaceae;uncultured;	0.0322	0.0141	0.032	0.0035	0.1277	0.0571	0.0536	0.0607	0.0026	0.0028	0.0022
Bacteria;Proteobacteria;Alphaproteobacteria;Rhizobiales;Methylopilaceae;Methylopila;	0.0012	0	0.0014	0	0.0018	0	0	0.0017	0	0	0
Bacteria;Proteobacteria;Alphaproteobacteria;Rhizobiales;Rhizobiaceae;Ahrensia;	0	0	0	0	0	0	0.0021	0	0	0	0
Bacteria;Proteobacteria;Alphaproteobacteria;Rhizobiales;Rhizobiaceae;Allorhizobium-Neorhizobium-Pararhizobium-Rhizobium;	0	0	0.0042	0	0.0009	0	0	0	0	0	0
Bacteria;Proteobacteria;Alphaproteobacteria;Rhizobiales;Rhizobiaceae;Aminobacter;	0.0099	0	0.0097	0	0.0211	0.0085	0.0196	0.0128	0.0013	0.0014	0.0007
Bacteria;Proteobacteria;Alphaproteobacteria;Rhizobiales;Rhizobiaceae;Aquamicrobium;	0	0	0.0014	0	0	0	0	0	0	0	0
Bacteria;Proteobacteria;Alphaproteobacteria;Rhizobiales;Rhizobiaceae;Aurantimonas;	0	0	0	0	0.0018	0	0	0	0	0	0
Bacteria;Proteobacteria;Alphaproteobacteria;Rhizobiales;Rhizobiaceae;Candidatus Liberibacter;	0	0	0	0	0	0	0.001	0	0	0	0
Bacteria;Proteobacteria;Alphaproteobacteria;Rhizobiales;Rhizobiaceae;Chelativorans;	0	0	0	0	0	0	0	0	0	0	0.0007
Bacteria;Proteobacteria;Alphaproteobacteria;Rhizobiales;Rhizobiaceae;Fulvimarina;	0	0	0	0	0.0018	0	0	0	0	0.0007	0
Bacteria;Proteobacteria;Alphaproteobacteria;Rhizobiales;Rhizobiaceae;Nitratireductor;	0	0	0	0	0.0009	0	0	0	0	0	0
Bacteria;Proteobacteria;Alphaproteobacteria;Rhizobiales;Rhizobiaceae;Ochrobactrum;	0	0	0	0	0.0009	0	0	0	0	0	0
Bacteria;Proteobacteria;Alphaproteobacteria;Rhizobiales;Rhizobiaceae;Shinella;	0.0074	0	0.007	0	0.0159	0.0085	0.0052	0.0017	0	0	0
Bacteria;Proteobacteria;Alphaproteobacteria;Rhizobiales;Rhizobiaceae;uncultured;	0	0	0.0042	0	0.0026	0	0	0.0009	0	0	0.0015
Bacteria;Proteobacteria;Alphaproteobacteria;Rhizobiales;Rhizobiales Incertae Sedis;Bauldia;	0.0012	0	0	0	0	0	0	0	0	0	0
Bacteria;Proteobacteria;Alphaproteobacteria;Rhizobiales;Rhizobiales Incertae Sedis;Dichotomicrobium;	0.0037	0	0.0042	0	0.0035	0.0036	0.0031	0.0026	0	0	0
Bacteria;Proteobacteria;Alphaproteobacteria;Rhizobiales;Rhizobiales Incertae Sedis;Nordella;	0	0	0.0014	0	0	0	0	0	0	0	0
Bacteria;Proteobacteria;Alphaproteobacteria;Rhizobiales;Rhodobiaceae;Tepidamorphus;	0	0	0	0	0	0	0	0	0	0	0.0007
Bacteria;Proteobacteria;Alphaproteobacteria;Rhizobiales;Rhodomicrobiaceae;Rhodomicrobium;	0.0074	0	0.007	0	0.0106	0.0024	0	0.0043	0	0	0
Bacteria;Proteobacteria;Alphaproteobacteria;Rhizobiales;Xanthobacteraceae;Blastochloris;	0	0	0.0014	0	0	0	0	0	0	0	0
Bacteria;Proteobacteria;Alphaproteobacteria;Rhizobiales;Xanthobacteraceae;Bradyrhizobium;	0.0037	0	0.0028	0	0	0.0012	0.0031	0	0	0	0.0007
Bacteria;Proteobacteria;Alphaproteobacteria;Rhizobiales;Xanthobacteraceae;GAS113;	0.0099	0	0	0	0	0	0	0	0	0	0
Bacteria;Proteobacteria;Alphaproteobacteria;Rhizobiales;Xanthobacteraceae;uncultured;	0	0.0011	0.0014	0	0.0018	0	0.0021	0	0	0	0
Bacteria;Proteobacteria;Alphaproteobacteria;Rhizobiales;uncultured;	0.0012	0.0011	0	0	0	0	0	0.0009	0	0	0
Bacteria;Proteobacteria;Alphaproteobacteria;Rhodobacterales;Rhodobacteraceae;	0	0.0315	0.0014	0.0254	0	0.0012	0.0021	0	0.0168	0.0085	0.0366
Bacteria;Proteobacteria;Alphaproteobacteria;Rhodobacterales;Rhodobacteraceae;Actibacterium;	0	0	0	0	0	0	0	0	0	0	0.0007
Bacteria;Proteobacteria;Alphaproteobacteria;Rhodobacterales;Rhodobacteraceae;Aestuariivita;	0.0421	0.0054	0.0445	0.1142	0.0713	0.0243	0.0526	0.0932	0.0026	0.0071	0.0629
Bacteria;Proteobacteria;Alphaproteobacteria;Rhodobacterales;Rhodobacteraceae;Albidovulum;	0	0	0	0	0.0009	0	0.0041	0	0	0	0
Bacteria;Proteobacteria;Alphaproteobacteria;Rhodobacterales;Rhodobacteraceae;Albimonas;	0.0347	0.7061	0.2267	0.6563	0.0097	0.0352	0.0516	0.0342	0.7305	0.7723	0.6841
Bacteria;Proteobacteria;Alphaproteobacteria;Rhodobacterales;Rhodobacteraceae;Aliiroseovarius;	0.0025	0.0065	0.007	0	0.0009	0.0024	0.0021	0	0	0.0319	0
Bacteria;Proteobacteria;Alphaproteobacteria;Rhodobacterales;Rhodobacteraceae;Amylibacter;	0.0285	0.8896	0.0988	1.5259	0.0476	0.0182	0.0052	0.0171	1.8075	0.4517	1.9156
Bacteria;Proteobacteria;Alphaproteobacteria;Rhodobacterales;Rhodobacteraceae;Ascidiaceihabitans;	0.1004	1.5772	0.3296	1.3944	0.2149	0.1445	0.1516	0.1599	0.7201	0.6021	1.2227
Bacteria;Proteobacteria;Alphaproteobacteria;Rhodobacterales;Rhodobacteraceae;Boseongicola;	0	0.0011	0	0	0	0	0	0	0	0	0
Bacteria;Proteobacteria;Alphaproteobacteria;Rhodobacterales;Rhodobacteraceae;Celeribacter;	0	0.0054	0	0	0	0	0	0	0.0013	0	0
Bacteria;Proteobacteria;Alphaproteobacteria;Rhodobacterales;Rhodobacteraceae;Cereibacter;	0.0099	0	0.0042	0	0.0018	0	0.0052	0.0034	0	0.0021	0
Bacteria;Proteobacteria;Alphaproteobacteria;Rhodobacterales;Rhodobacteraceae;Defluviimonas;	0	0	0.0014	0	0	0	0	0	0	0	0
Bacteria;Proteobacteria;Alphaproteobacteria;Rhodobacterales;Rhodobacteraceae;Donghicola;	0	0	0.0042	0	0	0.0012	0.001	0	0.0013	0	0
Bacteria;Proteobacteria;Alphaproteobacteria;Rhodobacterales;Rhodobacteraceae;Falsirhodobacter;	0	0	0.0028	0	0.0009	0.0049	0.001	0.0017	0	0	0
Bacteria;Proteobacteria;Alphaproteobacteria;Rhodobacterales;Rhodobacteraceae;Gemmobacter;	0.0025	0.0011	0.0042	0	0.0062	0.0012	0	0.0043	0	0	0.0015
Bacteria;Proteobacteria;Alphaproteobacteria;Rhodobacterales;Rhodobacteraceae;Haematobacter;	0	0	0	0	0.0009	0	0	0	0	0	0
Bacteria;Proteobacteria;Alphaproteobacteria;Rhodobacterales;Rhodobacteraceae;Halocynthiibacter;	0.0074	0.0033	0.0042	0.0023	0.015	0.0036	0.0021	0.0034	0	0.0043	0
Bacteria;Proteobacteria;Alphaproteobacteria;Rhodobacterales;Rhodobacteraceae;Jannaschia;	0.005	0.0141	0.0083	0.0092	0.0264	0.0012	0.0041	0	0.0052	0	0.0044
Bacteria;Proteobacteria;Alphaproteobacteria;Rhodobacterales;Rhodobacteraceae;Ketogulonicigenium;	0.0012	0.0065	0.0014	0	0.0282	0.0012	0.001	0.0026	0.0091	0	0
Bacteria;Proteobacteria;Alphaproteobacteria;Rhodobacterales;Rhodobacteraceae;Lacimonas;	0	0	0	0.0012	0.0009	0	0	0	0	0	0.0022
Bacteria;Proteobacteria;Alphaproteobacteria;Rhodobacterales;Rhodobacteraceae;Leisingera;	0	0	0.0014	0	0	0	0	0	0	0	0
Bacteria;Proteobacteria;Alphaproteobacteria;Rhodobacterales;Rhodobacteraceae;Lentibacter;	0.0471	0.1553	0.0709	0.1938	0.0802	0.0534	0.0691	0.0924	0.2508	0.112	0.2276
Bacteria;Proteobacteria;Alphaproteobacteria;Rhodobacterales;Rhodobacteraceae;Litoreibacter;	0.0087	0.0098	0.0431	0.0254	0.0247	0.0158	0.0134	0.0197	0.0142	0.0043	0.0205
Bacteria;Proteobacteria;Alphaproteobacteria;Rhodobacterales;Rhodobacteraceae;Litorimicrobium;	0.005	0.0033	0.0014	0	0.0141	0	0.0021	0.0017	0.0026	0	0
Bacteria;Proteobacteria;Alphaproteobacteria;Rhodobacterales;Rhodobacteraceae;Litorisediminivivens;	0	0	0	0	0	0	0	0	0	0	0.0007
Bacteria;Proteobacteria;Alphaproteobacteria;Rhodobacterales;Rhodobacteraceae;Loktanella;	0.1338	0.5464	0.2072	0.2618	0.3294	0.0838	0.1825	0.1428	0.5055	0.2135	0.2422
Bacteria;Proteobacteria;Alphaproteobacteria;Rhodobacterales;Rhodobacteraceae;Marinosulfonomonas;	0.0012	0.0054	0	0	0.007	0.0012	0.001	0.0009	0.0013	0.0007	0
Bacteria;Proteobacteria;Alphaproteobacteria;Rhodobacterales;Rhodobacteraceae;Marinovum;	0.0099	0.0011	0.0236	0.0012	0.0176	0.0085	0.0196	0.0111	0	0	0.0007
Bacteria;Proteobacteria;Alphaproteobacteria;Rhodobacterales;Rhodobacteraceae;Marivita;	0.0012	0.0489	0.0097	0.128	0.0035	0.0024	0	0.0009	0.1655	0.0411	0.1156
Bacteria;Proteobacteria;Alphaproteobacteria;Rhodobacterales;Rhodobacteraceae;Marivivens;	0.0037	0	0	0	0.0018	0	0	0	0	0	0.0015
Bacteria;Proteobacteria;Alphaproteobacteria;Rhodobacterales;Rhodobacteraceae;Nereida;	0.005	0.0109	0.0111	0.0035	0.0255	0.0097	0.0031	0.0017	0.0103	0.0149	0.0007
Bacteria;Proteobacteria;Alphaproteobacteria;Rhodobacterales;Rhodobacteraceae;Oceanibulbus;	0	0	0	0	0.0009	0	0	0.0009	0	0	0
Bacteria;Proteobacteria;Alphaproteobacteria;Rhodobacterales;Rhodobacteraceae;Octadecabacter;	0.0112	0.038	0.0153	0.0127	0.0009	0.0024	0.001	0.0205	0.0504	0.4241	0.008
Bacteria;Proteobacteria;Alphaproteobacteria;Rhodobacterales;Rhodobacteraceae;Pacificibacter;	0.0942	0.3433	0.249	0.2203	0.17	0.0765	0.1991	0.248	0.2379	0.0879	0.1998
Bacteria;Proteobacteria;Alphaproteobacteria;Rhodobacterales;Rhodobacteraceae;Paracoccus;	0.005	0.0109	0.0028	0	0.0194	0.0049	0.0031	0	0.0052	0.0064	0.0549
Bacteria;Proteobacteria;Alphaproteobacteria;Rhodobacterales;Rhodobacteraceae;Pelagibaca;	0	0	0	0	0	0	0	0	0	0.0007	0
Bacteria;Proteobacteria;Alphaproteobacteria;Rhodobacterales;Rhodobacteraceae;Planktomarina;	1.3458	2.0269	2.5245	1.745	1.8822	1.3029	1.6677	2.4514	1.2554	1.3275	1.7326
Bacteria;Proteobacteria;Alphaproteobacteria;Rhodobacterales;Rhodobacteraceae;Planktotalea;	0.0335	0.2162	0.0723	0.1361	0.044	0.0243	0.0361	0.0513	0.1564	0.0794	0.1083
Bacteria;Proteobacteria;Alphaproteobacteria;Rhodobacterales;Rhodobacteraceae;Ponticoccus;	0	0	0.0014	0	0	0.0024	0	0	0	0	0.0007
Bacteria;Proteobacteria;Alphaproteobacteria;Rhodobacterales;Rhodobacteraceae;Pseudophaeobacter;	0.0012	0.0597	0.0097	0.0957	0.0026	0	0.0031	0.0009	0.1435	0.0269	0.1266
Bacteria;Proteobacteria;Alphaproteobacteria;Rhodobacterales;Rhodobacteraceae;Pseudorhodobacter;	0.0409	0	0.0195	0	0.007	0.0279	0.0113	0.0214	0	0	0
Bacteria;Proteobacteria;Alphaproteobacteria;Rhodobacterales;Rhodobacteraceae;Pseudoruegeria;	0.0062	0	0.0056	0	0.0026	0.0024	0.0093	0.0094	0.0013	0	0.0007
Bacteria;Proteobacteria;Alphaproteobacteria;Rhodobacterales;Rhodobacteraceae;Rhodobacter;	0.0112	0	0.0028	0	0.0035	0.0036	0.0021	0.0034	0	0	0
Bacteria;Proteobacteria;Alphaproteobacteria;Rhodobacterales;Rhodobacteraceae;Rhodobaculum;	0.0025	0	0	0.0277	0	0	0	0	0.0013	0	0
Bacteria;Proteobacteria;Alphaproteobacteria;Rhodobacterales;Rhodobacteraceae;Roseibacterium;	0	0	0	0	0.0009	0	0.0021	0	0	0	0.0015
Bacteria;Proteobacteria;Alphaproteobacteria;Rhodobacterales;Rhodobacteraceae;Roseicyclus;	0	0	0	0	0	0.0012	0	0	0	0	0
Bacteria;Proteobacteria;Alphaproteobacteria;Rhodobacterales;Rhodobacteraceae;Roseobacter clade CHAB-I-5 lineage;	0.0037	0	0	0	0.0035	0	0	0	0.0013	0.0057	0
Bacteria;Proteobacteria;Alphaproteobacteria;Rhodobacterales;Rhodobacteraceae;Roseobacter clade NAC11-7 lineage;	0.0198	0.0467	0.0473	0.1176	0.0273	0.017	0.0289	0.0359	0.1086	0.0468	0.1229
Bacteria;Proteobacteria;Alphaproteobacteria;Rhodobacterales;Rhodobacteraceae;Roseobacter;	0	0	0	0	0.0009	0	0	0	0	0	0
Bacteria;Proteobacteria;Alphaproteobacteria;Rhodobacterales;Rhodobacteraceae;Roseovarius;	0.0037	0.1336	0.0209	0.1246	0.0026	0.0024	0.001	0.0009	0.1034	0.1156	0.1456
Bacteria;Proteobacteria;Alphaproteobacteria;Rhodobacterales;Rhodobacteraceae;Rubellimicrobium;	0	0	0	0	0	0.0012	0	0	0.0078	0	0.0015
Bacteria;Proteobacteria;Alphaproteobacteria;Rhodobacterales;Rhodobacteraceae;Ruegeria;	0	0.0065	0	0.0035	0.0106	0	0	0.0009	0.0013	0.0014	0.0051
Bacteria;Proteobacteria;Alphaproteobacteria;Rhodobacterales;Rhodobacteraceae;Sedimentitalea;	0	0.0011	0.0014	0.0012	0.0009	0	0	0.0017	0.0039	0.0121	0
Bacteria;Proteobacteria;Alphaproteobacteria;Rhodobacterales;Rhodobacteraceae;Seohaeicola;	0	0	0	0	0	0	0	0	0	0.0007	0
Bacteria;Proteobacteria;Alphaproteobacteria;Rhodobacterales;Rhodobacteraceae;Shimia;	0.0012	0.0282	0.0167	0.0023	0.0009	0.0049	0.0083	0.0026	0.0091	0.0894	0
Bacteria;Proteobacteria;Alphaproteobacteria;Rhodobacterales;Rhodobacteraceae;Silicimonas;	0	0	0	0	0	0	0	0	0	0	0.0007
Bacteria;Proteobacteria;Alphaproteobacteria;Rhodobacterales;Rhodobacteraceae;Sulfitobacter;	0.1301	0.6072	0.299	0.4879	0.0449	0.0692	0.067	0.1103	0.662	1.2807	0.3483
Bacteria;Proteobacteria;Alphaproteobacteria;Rhodobacterales;Rhodobacteraceae;Tabrizicola;	0.0037	0	0.0028	0	0.0026	0	0	0	0	0	0
Bacteria;Proteobacteria;Alphaproteobacteria;Rhodobacterales;Rhodobacteraceae;Tateyamaria;	0	0	0	0.0023	0	0	0	0	0	0	0.0015
Bacteria;Proteobacteria;Alphaproteobacteria;Rhodobacterales;Rhodobacteraceae;Thalassobius;	0.0496	0.0717	0.0904	0.0265	0.0599	0.0376	0.0433	0.0488	0.0272	0.0255	0.0227
Bacteria;Proteobacteria;Alphaproteobacteria;Rhodobacterales;Rhodobacteraceae;Thalassococcus;	0	0.0022	0	0	0.0035	0	0	0	0	0	0
Bacteria;Proteobacteria;Alphaproteobacteria;Rhodobacterales;Rhodobacteraceae;Tropicibacter;	0	0	0	0	0	0	0.001	0	0	0	0
Bacteria;Proteobacteria;Alphaproteobacteria;Rhodobacterales;Rhodobacteraceae;WDS1C4;	0.0632	0.0065	0.0181	0	0.0273	0.0607	0.0299	0.0855	0.0039	0.0064	0.0059
Bacteria;Proteobacteria;Alphaproteobacteria;Rhodobacterales;Rhodobacteraceae;uncultured;	0.9505	1.6305	1.3951	1.3829	1.3	0.8949	1.0778	1.3215	1.6704	1.0467	1.6448
Bacteria;Proteobacteria;Alphaproteobacteria;Rhodospirillales;AEGEAN-169 marine group;	0.1648	0.0391	0.3811	0.2214	0.6729	0.2513	0.4466	0.4208	0.0401	0.0922	0.199
Bacteria;Proteobacteria;Alphaproteobacteria;Rhodospirillales;Magnetospiraceae;Magnetospira;	0.202	0.3595	0.2657	0.0634	0.3409	0.1409	0.2764	0.3199	0.2185	0.361	0.0527
Bacteria;Proteobacteria;Alphaproteobacteria;Rhodospirillales;Magnetospiraceae;Magnetovibrio;	0.0037	0.0011	0.0056	0.0035	0.0079	0.0049	0.0186	0.0068	0	0.0035	0.0029
Bacteria;Proteobacteria;Alphaproteobacteria;Rhodospirillales;Magnetospiraceae;uncultured;	0.3643	0.0217	0.4854	0.0692	0.7073	0.3145	0.4383	0.408	0.0181	0.034	0.0439
Bacteria;Proteobacteria;Alphaproteobacteria;Rhodospirillales;Magnetospirillaceae;Magnetospirillum;	0	0	0	0	0.0009	0.0024	0	0	0	0	0
Bacteria;Proteobacteria;Alphaproteobacteria;Rhodospirillales;Magnetospirillaceae;Phaeospirillum;	0	0	0.0014	0	0.0009	0.0012	0.0021	0.0009	0	0	0
Bacteria;Proteobacteria;Alphaproteobacteria;Rhodospirillales;Magnetospirillaceae;Telmatospirillum;	0.0012	0	0	0	0	0	0	0	0	0	0
Bacteria;Proteobacteria;Alphaproteobacteria;Rhodospirillales;Magnetospirillaceae;uncultured;	0.0012	0	0	0	0	0.0012	0.001	0.0017	0.0013	0	0
Bacteria;Proteobacteria;Alphaproteobacteria;Rhodospirillales;Rhodopirillaceae;Defluviicoccus;	0	0	0.0014	0	0	0.0012	0.001	0	0	0	0
Bacteria;Proteobacteria;Alphaproteobacteria;Rhodospirillales;Rhodospirillaceae;Candidatus Riegeria;	0.0012	0	0	0	0	0	0.001	0	0	0	0.0007
Bacteria;Proteobacteria;Alphaproteobacteria;Rhodospirillales;Rhodospirillaceae;Rhodospirillum;	0	0	0.0097	0	0.0009	0	0	0.006	0	0	0
Bacteria;Proteobacteria;Alphaproteobacteria;Rhodospirillales;Rhodospirillaceae;Roseospirillum;	0	0	0	0	0.0044	0.0012	0.0021	0	0	0.0007	0
Bacteria;Proteobacteria;Alphaproteobacteria;Rhodospirillales;Rhodospirillaceae;uncultured;	0.0025	0.0022	0.0111	0	0.0106	0.0049	0.0093	0.0068	0	0	0.0029
Bacteria;Proteobacteria;Alphaproteobacteria;Rhodospirillales;Thalassospiraceae;Thalassospira;	0.0025	0	0.0014	0.0035	0.0035	0.0024	0	0	0.0039	0.0028	0
Bacteria;Proteobacteria;Alphaproteobacteria;Rhodospirillales;uncultured;	0.0112	0.0022	0.0223	0	0.022	0.0085	0.0113	0.0257	0	0	0
Bacteria;Proteobacteria;Alphaproteobacteria;Rhodovibrionales;Fodinicurvataceae;Rhodovibrio;	0.0012	0	0	0	0	0	0	0	0	0	0
Bacteria;Proteobacteria;Alphaproteobacteria;Rhodovibrionales;Fodinicurvataceae;uncultured;	0	0	0	0	0	0.0012	0	0	0	0	0
Bacteria;Proteobacteria;Alphaproteobacteria;Rhodovibrionales;Kiloniellaceae;Pelagibius;	0.0025	0	0	0	0.0026	0.0012	0.001	0	0	0	0
Bacteria;Proteobacteria;Alphaproteobacteria;Rhodovibrionales;Kiloniellaceae;Tistlia;	0	0	0.0042	0	0.007	0.0012	0.0031	0.0051	0	0	0
Bacteria;Proteobacteria;Alphaproteobacteria;Rhodovibrionales;Kiloniellaceae;uncultured;	0.0173	0	0.0515	0	0.0608	0.0304	0.0464	0.0308	0.0026	0.0035	0
Bacteria;Proteobacteria;Alphaproteobacteria;Rickettsiales;AB1;	0.0012	0	0.0028	0.0023	0.0035	0	0.0052	0.0017	0	0	0
Bacteria;Proteobacteria;Alphaproteobacteria;Rickettsiales;Anaplasmataceae;uncultured;	0	0	0	0	0	0	0	0	0	0	0.0007
Bacteria;Proteobacteria;Alphaproteobacteria;Rickettsiales;Midichloriaceae;	0	0	0.0014	0	0	0	0	0	0.0039	0	0
Bacteria;Proteobacteria;Alphaproteobacteria;Rickettsiales;Midichloriaceae;Candidatus Lariskella;	0	0	0	0.0012	0	0	0	0.0009	0	0	0
Bacteria;Proteobacteria;Alphaproteobacteria;Rickettsiales;Midichloriaceae;MD3-55;	0.0124	0.0011	0.007	0.0092	0.0044	0.0316	0.0041	0.012	0.0091	0	0.0015
Bacteria;Proteobacteria;Alphaproteobacteria;Rickettsiales;Mitochondria;	0.2032	0.1423	0.185	0.2641	0.148	0.4456	0.1939	0.2925	0.3103	0.1993	0.3629
Bacteria;Proteobacteria;Alphaproteobacteria;Rickettsiales;Rickettsiaceae;Candidatus Cryptoprodotis;	0	0	0	0.0069	0	0	0	0	0	0	0
Bacteria;Proteobacteria;Alphaproteobacteria;Rickettsiales;Rickettsiaceae;Candidatus Gigarickettsia;	0	0	0	0	0	0	0	0	0.0013	0	0
Bacteria;Proteobacteria;Alphaproteobacteria;Rickettsiales;Rickettsiaceae;Candidatus Megaira;	0.0074	0	0.0056	0.0023	0.0053	0.0206	0.0072	0.0086	0.0052	0.0043	0.0066
Bacteria;Proteobacteria;Alphaproteobacteria;Rickettsiales;Rickettsiaceae;Orientia;	0	0	0	0	0	0.0012	0	0	0	0	0
Bacteria;Proteobacteria;Alphaproteobacteria;Rickettsiales;Rickettsiaceae;Rickettsia;	0	0	0	0	0.0009	0.0012	0	0	0	0.0014	0.0007
Bacteria;Proteobacteria;Alphaproteobacteria;Rickettsiales;Rickettsiaceae;uncultured;	0.0099	0.0304	0.0083	0.0023	0	0.0036	0.0041	0.0017	0.0388	0.0071	0.0022
Bacteria;Proteobacteria;Alphaproteobacteria;Rickettsiales;S25-593;	0	0	0.0014	0.0046	0.0026	0.0024	0	0	0.0026	0	0.0088
Bacteria;Proteobacteria;Alphaproteobacteria;Rickettsiales;SM2D12;	0	0	0.0014	0	0.0009	0.0012	0.001	0.0009	0	0	0
Bacteria;Proteobacteria;Alphaproteobacteria;Rickettsiales;uncultured;	0	0	0	0.0012	0	0	0	0.0009	0	0	0
Bacteria;Proteobacteria;Alphaproteobacteria;SAR11 clade;Clade I;Clade Ia;	19.1038	8.9431	19.5755	15.5404	17.5717	16.7721	18.5386	17.6629	8.9714	10.1627	16.3459
Bacteria;Proteobacteria;Alphaproteobacteria;SAR11 clade;Clade I;Clade Ib;	1.9716	0.9059	2.0015	1.6101	1.6506	1.6598	2.2679	1.9707	0.8287	1.007	1.5973
Bacteria;Proteobacteria;Alphaproteobacteria;SAR11 clade;Clade I;uncultured;	0.1586	0.05	0.2184	0.0369	0.111	0.1979	0.2279	0.1018	0.0427	0.0248	0.0556
Bacteria;Proteobacteria;Alphaproteobacteria;SAR11 clade;Clade II;	4.3001	0.6289	3.092	1.6101	3.5822	3.5407	3.3601	3.0313	1.4558	0.4815	2.0678
Bacteria;Proteobacteria;Alphaproteobacteria;SAR11 clade;Clade III;	0.9604	0.1466	0.4187	0.2341	0.8438	0.7261	0.4218	0.5936	0.1099	0.1652	0.2466
Bacteria;Proteobacteria;Alphaproteobacteria;SAR11 clade;Clade IV;	0.3755	0.0815	0.5188	1.1015	0.3823	0.3594	0.5559	0.5885	0.0931	0.178	1.0631
Bacteria;Proteobacteria;Alphaproteobacteria;SAR11 clade;uncultured;	0.637	0.0337	0.3505	0.0519	0.4809	0.4323	0.4125	0.3849	0.0646	0.0397	0.0739
Bacteria;Proteobacteria;Alphaproteobacteria;Sneathiellales;Sneathiellaceae;AT-s3-44;	0.0558	0.0022	0.1141	0	0.1718	0.0583	0.1134	0.1266	0.0052	0.0014	0.0007
Bacteria;Proteobacteria;Alphaproteobacteria;Sneathiellales;Sneathiellaceae;Ferrovibrio;	0	0	0	0	0	0	0	0.006	0	0	0
Bacteria;Proteobacteria;Alphaproteobacteria;Sneathiellales;Sneathiellaceae;Oceanibacterium;	0	0	0	0	0	0	0.001	0	0	0	0
Bacteria;Proteobacteria;Alphaproteobacteria;Sneathiellales;Sneathiellaceae;Sneathiella;	0	0	0	0	0	0	0	0.0009	0	0.0007	0
Bacteria;Proteobacteria;Alphaproteobacteria;Sneathiellales;Sneathiellaceae;uncultured;	0	0	0.0195	0	0.007	0.0158	0.0052	0	0	0	0
Bacteria;Proteobacteria;Alphaproteobacteria;Sphingomonadales;Sphingomonadaceae;Altererythrobacter;	0.0037	0	0.0014	0	0.0185	0.0073	0	0	0	0	0
Bacteria;Proteobacteria;Alphaproteobacteria;Sphingomonadales;Sphingomonadaceae;Blastomonas;	0.0112	0.0022	0.007	0	0.0678	0.0036	0	0	0	0	0
Bacteria;Proteobacteria;Alphaproteobacteria;Sphingomonadales;Sphingomonadaceae;Ellin6055;	0	0	0.0014	0	0.0018	0	0	0	0	0	0
Bacteria;Proteobacteria;Alphaproteobacteria;Sphingomonadales;Sphingomonadaceae;Erythrobacter;	0.0335	0.0185	0.0097	0.0081	0.0264	0.0449	0.0134	0.1351	0.0078	0.0482	0.0146
Bacteria;Proteobacteria;Alphaproteobacteria;Sphingomonadales;Sphingomonadaceae;Novosphingobium;	0.0037	0	0.0014	0	0.0026	0.0036	0.0041	0.0026	0	0.0007	0
Bacteria;Proteobacteria;Alphaproteobacteria;Sphingomonadales;Sphingomonadaceae;Porphyrobacter;	0.0074	0	0	0	0.0167	0.0012	0	0	0	0	0
Bacteria;Proteobacteria;Alphaproteobacteria;Sphingomonadales;Sphingomonadaceae;Rhizorhapis;	0	0	0.0014	0	0	0	0	0.0009	0	0.0007	0.0007
Bacteria;Proteobacteria;Alphaproteobacteria;Sphingomonadales;Sphingomonadaceae;Sphingobium;	0	0	0	0	0.0018	0	0.001	0	0	0	0
Bacteria;Proteobacteria;Alphaproteobacteria;Sphingomonadales;Sphingomonadaceae;Sphingomonas;	0.0285	0.0098	0.007	0.0104	0.0634	0.0255	0.0206	0.1001	0.0013	0.0475	0.0249
Bacteria;Proteobacteria;Alphaproteobacteria;Sphingomonadales;Sphingomonadaceae;Sphingopyxis;	0.005	0	0	0	0.0088	0.0012	0.001	0.0026	0	0.0007	0.0007
Bacteria;Proteobacteria;Alphaproteobacteria;Sphingomonadales;Sphingomonadaceae;Sphingorhabdus;	0.0012	0.0022	0	0	0.0035	0	0	0	0	0	0
Bacteria;Proteobacteria;Alphaproteobacteria;Sphingomonadales;Sphingomonadaceae;uncultured;	0.0025	0	0	0.0115	0.0088	0.0024	0.0052	0.0026	0	0	0.0007
Bacteria;Proteobacteria;Alphaproteobacteria;Thalassobaculales;Nisaeaceae;OM75 clade;	0.1227	0.0174	0.2684	0.0819	0.3506	0.1542	0.3001	0.225	0.0194	0.0113	0.0607
Bacteria;Proteobacteria;Alphaproteobacteria;Thalassobaculales;Thalassobaculaceae;Thalassobaculum;	0.0012	0	0	0.0012	0.0009	0	0.001	0.0009	0	0	0
Bacteria;Proteobacteria;Alphaproteobacteria;Thalassobaculales;uncultured;	0.0062	0	0.007	0	0.0026	0.0012	0.0103	0.0017	0	0	0.0007
Bacteria;Proteobacteria;Alphaproteobacteria;Tistrellales;Tistrellaceae;Tistrella;	0	0	0	0	0	0.0012	0.0021	0	0	0	0
Bacteria;Proteobacteria;Alphaproteobacteria;uncultured;	0.4325	0.1173	0.6565	0.0784	0.9319	0.4687	0.6962	0.5765	0.0983	0.1191	0.098
Bacteria;Proteobacteria;Deltaproteobacteria;Bdellovibrionales;Bacteriovoracaceae;Halobacteriovorax;	0	0	0	0.0069	0	0	0	0	0	0	0.0022
Bacteria;Proteobacteria;Deltaproteobacteria;Bdellovibrionales;Bacteriovoracaceae;Peredibacter;	0.0087	0.0445	0.0083	0.0496	0.0018	0.0012	0.0031	0.0009	0.0478	0.005	0.0139
Bacteria;Proteobacteria;Deltaproteobacteria;Bdellovibrionales;Bacteriovoracaceae;uncultured;	0	0	0	0	0.0018	0	0	0	0	0	0.0015
Bacteria;Proteobacteria;Deltaproteobacteria;Bdellovibrionales;Bdellovibrionaceae;Bdellovibrio;	0	0	0	0	0	0	0	0	0	0.0021	0
Bacteria;Proteobacteria;Deltaproteobacteria;Bdellovibrionales;Bdellovibrionaceae;OM27 clade;	0.0012	0.0043	0.0125	0.075	0.0458	0.0061	0.0072	0.0017	0.0013	0	0.0198
Bacteria;Proteobacteria;Deltaproteobacteria;Deltaproteobacteria Incertae Sedis;Unknown Family;Deferrisoma;	0	0	0	0	0	0	0.001	0	0	0	0
Bacteria;Proteobacteria;Deltaproteobacteria;Desulfarculales;Desulfarculaceae;Desulfarculus;	0	0	0.0014	0	0	0	0	0	0	0	0
Bacteria;Proteobacteria;Deltaproteobacteria;Desulfarculales;Desulfarculaceae;Desulfatiglans;	0	0	0	0	0	0.0012	0	0	0	0	0
Bacteria;Proteobacteria;Deltaproteobacteria;Desulfarculales;Desulfarculaceae;uncultured;	0.005	0	0.0111	0	0	0.0024	0.0031	0	0	0.0014	0
Bacteria;Proteobacteria;Deltaproteobacteria;Desulfobacterales;Desulfobacteraceae;Desulfatiferula;	0	0	0.0014	0	0	0	0	0	0	0	0
Bacteria;Proteobacteria;Deltaproteobacteria;Desulfobacterales;Desulfobacteraceae;Desulfobacula;	0	0.0011	0	0.0012	0.0018	0	0	0	0	0	0
Bacteria;Proteobacteria;Deltaproteobacteria;Desulfobacterales;Desulfobacteraceae;uncultured;	0	0	0	0.0012	0	0	0	0	0	0	0
Bacteria;Proteobacteria;Deltaproteobacteria;Desulfobacterales;Desulfobulbaceae;Desulfocapsa;	0	0	0.0014	0	0.0009	0.0012	0	0	0	0	0
Bacteria;Proteobacteria;Deltaproteobacteria;Desulfobacterales;Desulfobulbaceae;SEEP-SRB4;	0	0	0	0	0.0009	0	0	0	0	0	0
Bacteria;Proteobacteria;Deltaproteobacteria;Desulfobacterales;Desulfobulbaceae;uncultured;	0	0	0	0	0.0044	0	0.0031	0.0026	0	0.0014	0.0007
Bacteria;Proteobacteria;Deltaproteobacteria;Desulfovibrionales;Desulfovibrionaceae;Desulfovibrio;	0	0	0	0	0.0009	0	0	0	0	0	0
Bacteria;Proteobacteria;Deltaproteobacteria;Desulfovibrionales;Desulfovibrionaceae;uncultured;	0	0.0022	0	0	0.0009	0	0	0	0	0	0
Bacteria;Proteobacteria;Deltaproteobacteria;Desulfuromonadales;Desulfuromonadaceae;Desulfuromonas;	0	0.0011	0	0	0.0009	0	0	0	0	0	0
Bacteria;Proteobacteria;Deltaproteobacteria;Desulfuromonadales;Desulfuromonadaceae;Desulfuromusa;	0	0	0	0	0	0	0	0	0	0	0.0007
Bacteria;Proteobacteria;Deltaproteobacteria;Desulfuromonadales;Geobacteraceae;Geobacter;	0	0	0	0	0.0035	0	0.001	0	0	0	0
Bacteria;Proteobacteria;Deltaproteobacteria;Desulfuromonadales;Geobacteraceae;Geopsychrobacter;	0	0	0	0	0	0	0	0.0009	0	0	0
Bacteria;Proteobacteria;Deltaproteobacteria;Myxococcales;	0	0	0	0	0	0	0.001	0	0	0	0
Bacteria;Proteobacteria;Deltaproteobacteria;Myxococcales;Archangiaceae;Stigmatella;	0	0	0	0	0.0018	0	0	0	0	0	0
Bacteria;Proteobacteria;Deltaproteobacteria;Myxococcales;BIrii41;	0	0	0	0	0	0	0	0.0017	0	0	0
Bacteria;Proteobacteria;Deltaproteobacteria;Myxococcales;Blfdi19;	0.0037	0.0011	0.0083	0.0046	0.0255	0.0194	0.0124	0.0026	0.0026	0.0043	0.0029
Bacteria;Proteobacteria;Deltaproteobacteria;Myxococcales;Haliangiaceae;Haliangium;	0	0	0	0	0.0009	0.0024	0	0	0	0	0
Bacteria;Proteobacteria;Deltaproteobacteria;Myxococcales;Nannocystaceae;Nannocystis;	0	0	0	0	0	0.0012	0	0	0	0	0
Bacteria;Proteobacteria;Deltaproteobacteria;Myxococcales;P3OB-42;	0	0.0022	0.0028	0	0.0026	0.0012	0.0062	0	0	0	0.0037
Bacteria;Proteobacteria;Deltaproteobacteria;Myxococcales;Sandaracinaceae;uncultured;	0	0	0	0	0.0009	0	0	0	0	0	0
Bacteria;Proteobacteria;Deltaproteobacteria;Myxococcales;bacteriap25;	0	0	0.0014	0	0	0	0	0	0	0	0
Bacteria;Proteobacteria;Deltaproteobacteria;NB1-j;	0.0285	0	0.0612	0.0138	0.0925	0.0279	0.0371	0.0231	0.0078	0	0.0037
Bacteria;Proteobacteria;Deltaproteobacteria;Oligoflexales;0319-6G20;	0	0	0.0083	0	0	0	0	0	0	0	0
Bacteria;Proteobacteria;Deltaproteobacteria;Oligoflexales;053A03-B-DI-P58;	0	0.0011	0.0014	0	0	0	0.001	0	0.0013	0	0.0007
Bacteria;Proteobacteria;Deltaproteobacteria;Oligoflexales;Oligoflexaceae;uncultured;	0	0	0	0	0.0035	0.0012	0.0021	0.0017	0	0	0
Bacteria;Proteobacteria;Deltaproteobacteria;PB19;	0.0037	0.0011	0.0125	0.0023	0.0194	0.0024	0	0.0051	0.0026	0	0.0102
Bacteria;Proteobacteria;Deltaproteobacteria;RCP2-54;	0	0	0	0	0	0	0.0021	0	0	0	0
Bacteria;Proteobacteria;Deltaproteobacteria;SAR324 clade(Marine group B);	2.4611	0.1097	2.0098	0.0277	2.2293	2.1905	2.6176	1.1761	0.0724	0.066	0.0776
Bacteria;Proteobacteria;Deltaproteobacteria;Sva0485;	0	0.0847	0.0111	0.0035	0.0062	0.0012	0.0113	0.006	0.0634	0.0135	0.008
Bacteria;Proteobacteria;Gammaproteobacteria;211ds20;	0	0	0.0014	0	0	0	0.0021	0	0	0	0
Bacteria;Proteobacteria;Gammaproteobacteria;AT-s2-59;	0.0025	0.0011	0.0042	0	0.0026	0	0	0	0.0039	0	0.0007
Bacteria;Proteobacteria;Gammaproteobacteria;Acidiferrobacterales;Acidiferrobacteraceae;Sulfurifustis;	0	0	0	0	0.0009	0	0	0	0	0	0
Bacteria;Proteobacteria;Gammaproteobacteria;Acidiferrobacterales;Acidiferrobacteraceae;uncultured;	0	0.0022	0.0014	0	0	0	0	0	0	0	0
Bacteria;Proteobacteria;Gammaproteobacteria;Acidithiobacillales;Acidithiobacillaceae;KCM-B-112;	0	0	0	0	0.0009	0	0	0	0	0	0
Bacteria;Proteobacteria;Gammaproteobacteria;Aeromonadales;Aeromonadaceae;	0	0	0	0	0	0	0.001	0	0	0	0
Bacteria;Proteobacteria;Gammaproteobacteria;Aeromonadales;Aeromonadaceae;Aeromonas;	0.14	0.1097	0.1321	0.0923	0.0757	0.1761	0.1186	0.1044	0.1034	0.1291	0.0754
Bacteria;Proteobacteria;Gammaproteobacteria;Aeromonadales;Aeromonadaceae;Tolumonas;	0	0	0.0014	0	0	0	0	0	0.0013	0	0
Bacteria;Proteobacteria;Gammaproteobacteria;Alteromonadales;Alteromonadaceae;	0	0	0	0	0.0026	0	0	0	0	0	0
Bacteria;Proteobacteria;Gammaproteobacteria;Alteromonadales;Alteromonadaceae;Aliiglaciecola;	0	0	0	0	0.0009	0	0	0	0	0	0
Bacteria;Proteobacteria;Gammaproteobacteria;Alteromonadales;Alteromonadaceae;Alteromonas;	0.0062	0.0054	0.0028	0	0.0018	0.0049	0.001	0.0043	0.0026	0.0816	0.0015
Bacteria;Proteobacteria;Gammaproteobacteria;Alteromonadales;Alteromonadaceae;Glaciecola;	0.0025	0.0033	0.0056	0.015	0.0097	0.0121	0.001	0	0.0013	0.034	0.0037
Bacteria;Proteobacteria;Gammaproteobacteria;Alteromonadales;Alteromonadaceae;Paraglaciecola;	0.1599	0.076	0.1168	0.0323	0.0299	0.0959	0.0351	0.0282	0.0465	0.5758	0.0205
Bacteria;Proteobacteria;Gammaproteobacteria;Alteromonadales;Alteromonadaceae;Rheinheimera;	0	0	0	0	0	0	0	0.0009	0	0	0.0007
Bacteria;Proteobacteria;Gammaproteobacteria;Alteromonadales;Alteromonadaceae;uncultured;	0	0	0	0	0	0	0	0.0017	0	0	0
Bacteria;Proteobacteria;Gammaproteobacteria;Alteromonadales;Colwelliaceae;Colwellia;	0.0558	0.0239	0.1252	0.1015	0.0528	0.0255	0.034	0.0094	0.0349	0.0085	0.0724
Bacteria;Proteobacteria;Gammaproteobacteria;Alteromonadales;Colwelliaceae;Thalassomonas;	0	0.0011	0.0014	0	0	0	0	0	0	0	0.0007
Bacteria;Proteobacteria;Gammaproteobacteria;Alteromonadales;Colwelliaceae;Thalassotalea;	0.0012	0	0.0014	0.0623	0.0053	0.0012	0	0	0.0013	0	0.0066
Bacteria;Proteobacteria;Gammaproteobacteria;Alteromonadales;Colwelliaceae;uncultured;	0.7423	0.4671	0.4632	0.2249	0.5531	0.7176	0.4734	0.3755	0.5947	0.69	0.1837
Bacteria;Proteobacteria;Gammaproteobacteria;Alteromonadales;Idiomarinaceae;Idiomarina;	0	0	0	0	0.0009	0	0	0	0	0	0
Bacteria;Proteobacteria;Gammaproteobacteria;Alteromonadales;Marinobacteraceae;Marinobacter;	0.0322	0.0087	0.007	0	0.0203	0.0024	0.001	0.0291	0.0026	0.0043	0
Bacteria;Proteobacteria;Gammaproteobacteria;Alteromonadales;Moritellaceae;Moritella;	0	0	0	0	0	0	0.0083	0	0	0	0
Bacteria;Proteobacteria;Gammaproteobacteria;Alteromonadales;Pseudoalteromonadaceae;Algicola;	0	0	0.0014	0	0.0009	0	0	0	0.022	0.0064	0
Bacteria;Proteobacteria;Gammaproteobacteria;Alteromonadales;Pseudoalteromonadaceae;Pseudoalteromonas;	0.0149	0.0956	0.0695	0.0012	0.1039	0.2623	0.032	0.1249	0.0155	0.0191	0.0139
Bacteria;Proteobacteria;Gammaproteobacteria;Alteromonadales;Psychromonadaceae;Psychromonas;	0	0	0	0.0012	0	0	0	0	0	0	0
Bacteria;Proteobacteria;Gammaproteobacteria;Alteromonadales;Shewanellaceae;Ferrimonas;	0	0	0.0014	0	0	0.0024	0	0	0	0	0
Bacteria;Proteobacteria;Gammaproteobacteria;Alteromonadales;Shewanellaceae;Shewanella;	0.1413	0.1217	0.1474	0.0877	0.1268	0.1603	0.133	0.1232	0.0892	0.1312	0.0863
Bacteria;Proteobacteria;Gammaproteobacteria;Arenicellales;Arenicellaceae;	0	0	0	0	0	0	0	0	0.0013	0	0
Bacteria;Proteobacteria;Gammaproteobacteria;Arenicellales;Arenicellaceae;Arenicella;	0.0173	0.0434	0.0209	0.0035	0.0035	0.0085	0	0.0094	0.0646	0.1014	0
Bacteria;Proteobacteria;Gammaproteobacteria;Arenicellales;Arenicellaceae;Candidatus Thiosymbion;	0	0.0043	0.0014	0.0035	0	0.0012	0	0	0.0039	0	0
Bacteria;Proteobacteria;Gammaproteobacteria;Arenicellales;Arenicellaceae;Perspicuibacter;	0	0	0	0	0.0018	0	0	0.0009	0	0	0
Bacteria;Proteobacteria;Gammaproteobacteria;Arenicellales;Arenicellaceae;uncultured;	0.0136	0.0098	0.0445	0.0358	0.044	0.0364	0.0588	0.0522	0.0103	0.0043	0.038
Bacteria;Proteobacteria;Gammaproteobacteria;B2M28;	0	0.0011	0	0	0.0009	0	0	0	0	0	0.0007
Bacteria;Proteobacteria;Gammaproteobacteria;BD7-8;	0	0	0	0	0	0.0049	0.001	0.006	0	0.0028	0.0007
Bacteria;Proteobacteria;Gammaproteobacteria;BD72BR169;	0	0	0	0	0	0	0	0	0.0013	0	0
Bacteria;Proteobacteria;Gammaproteobacteria;Beggiatoales;Beggiatoaceae;Candidatus Marithrix;	0	0	0	0	0.0018	0	0	0.0009	0	0	0
Bacteria;Proteobacteria;Gammaproteobacteria;Beggiatoales;Beggiatoaceae;Candidatus Thiophysa;	0.0012	0	0.0014	0	0.0009	0.0012	0	0.0026	0	0	0
Bacteria;Proteobacteria;Gammaproteobacteria;Beggiatoales;Beggiatoaceae;Candidatus Thiopilula;	0	0	0	0	0.0009	0	0	0	0	0	0
Bacteria;Proteobacteria;Gammaproteobacteria;Beggiatoales;Beggiatoaceae;Thioflexothrix;	0.0087	0	0	0	0	0.0073	0.001	0.0034	0	0	0
Bacteria;Proteobacteria;Gammaproteobacteria;Beggiatoales;Beggiatoaceae;Thiomargarita;	0	0	0.0014	0	0	0	0	0	0	0	0
Bacteria;Proteobacteria;Gammaproteobacteria;Betaproteobacteriales;Burkholderiaceae;Achromobacter;	0	0	0	0	0	0.0036	0	0.0026	0	0	0
Bacteria;Proteobacteria;Gammaproteobacteria;Betaproteobacteriales;Burkholderiaceae;Aquabacterium;	0.0012	0	0	0	0	0	0	0	0	0	0
Bacteria;Proteobacteria;Gammaproteobacteria;Betaproteobacteriales;Burkholderiaceae;Burkholderia-Caballeronia-Paraburkholderia;	0	0.0022	0	0	0	0	0	0	0	0	0
Bacteria;Proteobacteria;Gammaproteobacteria;Betaproteobacteriales;Burkholderiaceae;Caenimonas;	0	0.0033	0.0014	0	0	0	0.0021	0	0	0.005	0
Bacteria;Proteobacteria;Gammaproteobacteria;Betaproteobacteriales;Burkholderiaceae;Candidatus Symbiobacter;	0	0.0022	0.0028	0	0.0026	0	0.001	0	0	0.0199	0
Bacteria;Proteobacteria;Gammaproteobacteria;Betaproteobacteriales;Burkholderiaceae;Collimonas;	0.0074	0	0.0028	0.0127	0.0009	0.0206	0	0	0	0	0.0015
Bacteria;Proteobacteria;Gammaproteobacteria;Betaproteobacteriales;Burkholderiaceae;Curvibacter;	0	0	0	0	0	0	0	0	0	0.0007	0
Bacteria;Proteobacteria;Gammaproteobacteria;Betaproteobacteriales;Burkholderiaceae;Delftia;	0	0	0	0	0	0	0	0.0009	0	0	0
Bacteria;Proteobacteria;Gammaproteobacteria;Betaproteobacteriales;Burkholderiaceae;Duganella;	0.0012	0	0	0.0012	0	0	0	0	0	0	0
Bacteria;Proteobacteria;Gammaproteobacteria;Betaproteobacteriales;Burkholderiaceae;GKS98 freshwater group;	0	0.0011	0	0	0	0.0012	0	0	0	0.0007	0.0007
Bacteria;Proteobacteria;Gammaproteobacteria;Betaproteobacteriales;Burkholderiaceae;Herminiimonas;	0.0545	0.0196	0.0431	0.0104	0.0344	0.0231	0.0526	0.0351	0.0103	0.0234	0.0095
Bacteria;Proteobacteria;Gammaproteobacteria;Betaproteobacteriales;Burkholderiaceae;Hydrogenophaga;	0.0012	0.0022	0.0042	0	0.0141	0	0	0.0009	0	0.0092	0
Bacteria;Proteobacteria;Gammaproteobacteria;Betaproteobacteriales;Burkholderiaceae;Limnohabitans;	0.0025	0	0	0	0	0	0.0021	0	0	0	0
Bacteria;Proteobacteria;Gammaproteobacteria;Betaproteobacteriales;Burkholderiaceae;MWH-UniP1 aquatic group;	0	0	0	0	0	0	0	0	0	0	0.0044
Bacteria;Proteobacteria;Gammaproteobacteria;Betaproteobacteriales;Burkholderiaceae;Massilia;	0	0	0	0.0012	0.0062	0.0049	0	0	0	0.0021	0.0007
Bacteria;Proteobacteria;Gammaproteobacteria;Betaproteobacteriales;Burkholderiaceae;Methylibium;	0.0012	0	0	0	0	0	0	0	0	0	0
Bacteria;Proteobacteria;Gammaproteobacteria;Betaproteobacteriales;Burkholderiaceae;Noviherbaspirillum;	0.0025	0	0	0.0046	0.0009	0	0	0	0	0	0
Bacteria;Proteobacteria;Gammaproteobacteria;Betaproteobacteriales;Burkholderiaceae;Oxalicibacterium;	0	0.0022	0	0	0	0	0	0	0	0.0043	0
Bacteria;Proteobacteria;Gammaproteobacteria;Betaproteobacteriales;Burkholderiaceae;Oxalobacter;	0.0012	0	0	0	0	0	0	0	0	0	0
Bacteria;Proteobacteria;Gammaproteobacteria;Betaproteobacteriales;Burkholderiaceae;Polaromonas;	0	0	0	0	0	0.0012	0	0	0	0	0
Bacteria;Proteobacteria;Gammaproteobacteria;Betaproteobacteriales;Burkholderiaceae;Polynucleobacter;	0.0037	0.0043	0.0042	0.015	0	0	0.001	0.0009	0	0	0.0015
Bacteria;Proteobacteria;Gammaproteobacteria;Betaproteobacteriales;Burkholderiaceae;Pseudorhodoferax;	0	0	0	0	0	0	0	0	0	0.0007	0
Bacteria;Proteobacteria;Gammaproteobacteria;Betaproteobacteriales;Burkholderiaceae;RS62 marine group;	0.0012	0.0771	0.0167	0.0023	0.0106	0	0.0103	0.012	0.0065	0.2283	0
Bacteria;Proteobacteria;Gammaproteobacteria;Betaproteobacteriales;Burkholderiaceae;Ralstonia;	0.0025	0	0	0	0	0.0049	0.0021	0	0	0.0078	0
Bacteria;Proteobacteria;Gammaproteobacteria;Betaproteobacteriales;Burkholderiaceae;Rhodoferax;	0	0	0	0	0.0009	0.0012	0	0	0	0	0
Bacteria;Proteobacteria;Gammaproteobacteria;Betaproteobacteriales;Burkholderiaceae;Rivibacter;	0	0	0	0	0	0	0	0	0	0.0007	0
Bacteria;Proteobacteria;Gammaproteobacteria;Betaproteobacteriales;Burkholderiaceae;Schlegelella;	0	0	0	0	0	0	0	0	0	0.005	0
Bacteria;Proteobacteria;Gammaproteobacteria;Betaproteobacteriales;Burkholderiaceae;Variovorax;	0	0	0.0028	0	0	0	0	0	0	0.0028	0
Bacteria;Proteobacteria;Gammaproteobacteria;Betaproteobacteriales;Burkholderiaceae;uncultured;	0.0012	0	0	0	0	0	0	0	0	0	0
Bacteria;Proteobacteria;Gammaproteobacteria;Betaproteobacteriales;Chitinibacteraceae;Chitinibacter;	0	0	0	0	0	0.0012	0	0	0	0	0
Bacteria;Proteobacteria;Gammaproteobacteria;Betaproteobacteriales;Ferrovaceae;Ferrovum;	0.0012	0.0011	0	0	0	0.0012	0	0.0017	0	0	0
Bacteria;Proteobacteria;Gammaproteobacteria;Betaproteobacteriales;Methylophilaceae;Candidatus Methylopumilus;	0.0235	0.0413	0.064	0.0381	0.0467	0.0121	0.0454	0.0137	0.0388	0.0184	0.0322
Bacteria;Proteobacteria;Gammaproteobacteria;Betaproteobacteriales;Methylophilaceae;MM1;	0.0037	0.0174	0.0097	0	0.0035	0.0061	0.0268	0.0299	0.0013	0.0078	0
Bacteria;Proteobacteria;Gammaproteobacteria;Betaproteobacteriales;Methylophilaceae;MM2;	0	0	0	0.0023	0	0	0	0	0.0039	0	0.0037
Bacteria;Proteobacteria;Gammaproteobacteria;Betaproteobacteriales;Methylophilaceae;Methylophilus;	0.0533	0.0543	0.0529	0.0173	0.0528	0.0534	0.0774	0.0547	0.0116	0.0305	0.0139
Bacteria;Proteobacteria;Gammaproteobacteria;Betaproteobacteriales;Methylophilaceae;Methylotenera;	0.0359	0.0282	0.0431	0.0461	0.0476	0.0206	0.0258	0.0111	0.0259	0.0177	0.0198
Bacteria;Proteobacteria;Gammaproteobacteria;Betaproteobacteriales;Methylophilaceae;OM43 clade;	1.1413	1.0167	1.16	0.6966	1.2419	0.9532	1.3954	0.9657	0.7137	0.7659	0.5451
Bacteria;Proteobacteria;Gammaproteobacteria;Betaproteobacteriales;Nitrosomonadaceae;Ellin6067;	0.005	0	0	0	0.0009	0	0.001	0	0	0	0
Bacteria;Proteobacteria;Gammaproteobacteria;Betaproteobacteriales;Nitrosomonadaceae;IS-44;	0.0087	0.0076	0.0028	0.0173	0.0573	0.0109	0.0072	0.0068	0.0052	0.0007	0.0205
Bacteria;Proteobacteria;Gammaproteobacteria;Betaproteobacteriales;Nitrosomonadaceae;Nitrosomonas;	0.0446	0.0109	0.0862	0.0069	0.1418	0.0194	0.0413	0.0257	0.0168	0.0021	0.0029
Bacteria;Proteobacteria;Gammaproteobacteria;Betaproteobacteriales;Nitrosomonadaceae;Nitrosospira;	0	0	0.007	0	0.0053	0	0	0	0.0026	0	0.0007
Bacteria;Proteobacteria;Gammaproteobacteria;Betaproteobacteriales;Rhodocyclaceae;uncultured;	0.0012	0	0.0028	0	0.0062	0.0024	0.0021	0.0026	0.0026	0	0.0015
Bacteria;Proteobacteria;Gammaproteobacteria;Betaproteobacteriales;SC-I-84;	0	0	0	0	0	0	0	0	0.0026	0	0
Bacteria;Proteobacteria;Gammaproteobacteria;Betaproteobacteriales;TRA3-20;	0	0	0	0	0	0	0	0.0009	0	0	0
Bacteria;Proteobacteria;Gammaproteobacteria;CCD24;	0	0	0	0	0.0053	0.0012	0.001	0	0	0	0
Bacteria;Proteobacteria;Gammaproteobacteria;CHAB-XI-27;	0	0	0	0	0.0009	0	0	0	0	0	0
Bacteria;Proteobacteria;Gammaproteobacteria;Cellvibrionales;	0	0	0	0	0	0	0.001	0	0	0.0014	0
Bacteria;Proteobacteria;Gammaproteobacteria;Cellvibrionales;BD2-7;	0.0012	0	0.0083	0	0	0	0	0.0034	0	0.0014	0
Bacteria;Proteobacteria;Gammaproteobacteria;Cellvibrionales;Cellvibrionaceae;Aestuariicella;	0	0.0011	0	0	0	0	0	0	0.0013	0	0
Bacteria;Proteobacteria;Gammaproteobacteria;Cellvibrionales;Cellvibrionaceae;Candidatus Endobugula;	0	0	0	0	0	0	0	0	0.0155	0	0
Bacteria;Proteobacteria;Gammaproteobacteria;Cellvibrionales;Cellvibrionaceae;Cellvibrio;	0.0012	0	0.0014	0	0	0	0.001	0.0009	0.0013	0	0.0015
Bacteria;Proteobacteria;Gammaproteobacteria;Cellvibrionales;Cellvibrionaceae;Gilvimarinus;	0	0	0.0014	0.0023	0	0	0	0	0.0026	0	0
Bacteria;Proteobacteria;Gammaproteobacteria;Cellvibrionales;Cellvibrionaceae;Marinagarivorans;	0	0	0	0	0.0026	0	0	0	0.0026	0	0
Bacteria;Proteobacteria;Gammaproteobacteria;Cellvibrionales;Cellvibrionaceae;Marinimicrobium;	0	0	0	0	0.0009	0	0	0	0	0	0
Bacteria;Proteobacteria;Gammaproteobacteria;Cellvibrionales;Cellvibrionaceae;Simiduia;	0	0	0	0	0	0	0.001	0	0	0	0
Bacteria;Proteobacteria;Gammaproteobacteria;Cellvibrionales;Cellvibrionaceae;uncultured;	0.0198	0.0163	0.0459	0.0161	0.0079	0.0049	0.0598	0.0009	0.0375	0.0092	0.0029
Bacteria;Proteobacteria;Gammaproteobacteria;Cellvibrionales;Halieaceae;	0	0	0	0.0012	0	0	0	0	0	0	0
Bacteria;Proteobacteria;Gammaproteobacteria;Cellvibrionales;Halieaceae;Congregibacter;	0.0905	0.0456	0.0612	0.0277	0.096	0.0619	0.0732	0.0607	0.022	0.066	0.0154
Bacteria;Proteobacteria;Gammaproteobacteria;Cellvibrionales;Halieaceae;Halioglobus;	0.4536	0.4845	0.4228	0.1488	0.2396	0.3934	0.3249	0.3473	0.5081	0.4531	0.0988
Bacteria;Proteobacteria;Gammaproteobacteria;Cellvibrionales;Halieaceae;Luminiphilus;	0.0446	0.7365	0.1419	0.0727	0.0476	0.0255	0.0495	0.0479	0.7964	0.156	0.0878
Bacteria;Proteobacteria;Gammaproteobacteria;Cellvibrionales;Halieaceae;Marimicrobium;	0.0136	0.2075	0.0278	0.0196	0.015	0.0049	0.0196	0.0068	0.2288	0.0326	0.0176
Bacteria;Proteobacteria;Gammaproteobacteria;Cellvibrionales;Halieaceae;OM60(NOR5) clade;	0.1809	3.2164	0.6746	0.3541	0.2378	0.1518	0.2094	0.207	3.7261	0.6297	0.2941
Bacteria;Proteobacteria;Gammaproteobacteria;Cellvibrionales;Microbulbiferaceae;Microbulbifer;	0	0	0	0	0	0.0012	0	0	0	0	0.0007
Bacteria;Proteobacteria;Gammaproteobacteria;Cellvibrionales;Porticoccaceae;C1-B045;	0.0025	0	0.0014	0.0069	0.0044	0.0012	0.0031	0	0	0.0007	0.0168
Bacteria;Proteobacteria;Gammaproteobacteria;Cellvibrionales;Porticoccaceae;Porticoccus;	0.1177	0.0087	0.0542	0.105	0.0608	0.0619	0.0949	0.0992	0.0129	0.0574	0.1354
Bacteria;Proteobacteria;Gammaproteobacteria;Cellvibrionales;Porticoccaceae;SAR92 clade;	6.1676	3.363	5.1574	1.7035	4.1873	4.9504	4.5462	5.1817	3.1883	5.064	1.6543
Bacteria;Proteobacteria;Gammaproteobacteria;Cellvibrionales;Spongiibacteraceae;BD1-7 clade;	0.0421	0.0174	0.0111	0.03	0.0106	0.0194	0.0031	0.0051	0.031	0.0184	0.0695
Bacteria;Proteobacteria;Gammaproteobacteria;Cellvibrionales;Spongiibacteraceae;Dasania;	0.005	0.0033	0.0014	0.0115	0	0	0	0.0094	0.0129	0.0057	0.0029
Bacteria;Proteobacteria;Gammaproteobacteria;Cellvibrionales;Spongiibacteraceae;Oceanicoccus;	0	0.0033	0	0	0	0	0	0	0.0039	0.0021	0.0015
Bacteria;Proteobacteria;Gammaproteobacteria;Cellvibrionales;Spongiibacteraceae;Sinobacterium;	0.0124	0.0402	0.025	0.0012	0.0026	0	0.0155	0.0103	0.0194	0.1021	0.0015
Bacteria;Proteobacteria;Gammaproteobacteria;Cellvibrionales;Spongiibacteraceae;uncultured;	0.0347	0.0739	0.0654	0.0358	0.0326	0.1445	0.0877	0.0505	0.1202	0.1042	0.0337
Bacteria;Proteobacteria;Gammaproteobacteria;Chromatiales;Chromatiaceae;Candidatus Thiobios;	0	0	0	0	0.0026	0	0.0052	0.0026	0	0.0312	0
Bacteria;Proteobacteria;Gammaproteobacteria;Chromatiales;Sedimenticolaceae;Candidatus Thiodiazotropha;	0	0	0	0	0.0009	0	0	0	0	0	0
Bacteria;Proteobacteria;Gammaproteobacteria;Chromatiales;Sedimenticolaceae;Sedimenticola;	0.0087	0	0.0042	0	0.0018	0.0036	0.0124	0.0043	0.0039	0.0035	0
Bacteria;Proteobacteria;Gammaproteobacteria;Chromatiales;Sedimenticolaceae;uncultured;	0.0012	0	0.0042	0	0.0044	0.0049	0.0052	0.0043	0.0013	0.0014	0
Bacteria;Proteobacteria;Gammaproteobacteria;Coxiellales;Coxiellaceae;Coxiella;	0.0087	0.0369	0.0236	0.0012	0.0115	0.0109	0.0186	0.006	0.0065	0	0.0022
Bacteria;Proteobacteria;Gammaproteobacteria;D90;	0	0.0141	0.0028	0.0058	0.0088	0	0	0	0	0	0.0037
Bacteria;Proteobacteria;Gammaproteobacteria;Diplorickettsiales;Diplorickettsiaceae;uncultured;	0	0	0	0	0.0044	0	0	0.0009	0	0	0
Bacteria;Proteobacteria;Gammaproteobacteria;EC3;	0	0	0	0	0	0.0012	0	0	0	0	0
Bacteria;Proteobacteria;Gammaproteobacteria;EPR3968-O8a-Bc78;	0.0112	0.0054	0.0473	0	0.0722	0.0158	0.0278	0.0282	0.0026	0.0007	0
Bacteria;Proteobacteria;Gammaproteobacteria;EV818SWSAP88;	0	0	0	0	0	0	0.0021	0	0	0	0
Bacteria;Proteobacteria;Gammaproteobacteria;Ectothiorhodospirales;Ectothiorhodospiraceae;Ectothiorhodospira;	0	0	0	0	0	0	0.001	0	0	0	0
Bacteria;Proteobacteria;Gammaproteobacteria;Ectothiorhodospirales;Ectothiorhodospiraceae;Thiogranum;	0	0.0022	0	0	0.0018	0	0.001	0	0	0	0.0007
Bacteria;Proteobacteria;Gammaproteobacteria;Ectothiorhodospirales;Ectothiorhodospiraceae;Thiohalomonas;	0.0012	0	0	0	0	0	0	0	0	0	0
Bacteria;Proteobacteria;Gammaproteobacteria;Ectothiorhodospirales;Ectothiorhodospiraceae;uncultured;	0.9319	0.6224	0.434	0.9965	1.0719	0.6472	0.5549	0.4431	0.3917	0.1156	0.72
Bacteria;Proteobacteria;Gammaproteobacteria;Ectothiorhodospirales;Thioalkalispiraceae;Thioalkalispira;	0	0	0	0	0.0009	0	0.001	0.0026	0	0	0
Bacteria;Proteobacteria;Gammaproteobacteria;Ectothiorhodospirales;Thioalkalispiraceae;Thiohalophilus;	0	0.0011	0	0	0	0	0	0	0	0	0.0007
Bacteria;Proteobacteria;Gammaproteobacteria;Enterobacteriales;Enterobacteriaceae;	0	0	0	0	0	0.0012	0	0	0	0	0
Bacteria;Proteobacteria;Gammaproteobacteria;Enterobacteriales;Enterobacteriaceae;Candidatus Benitsuchiphilus;	0	0	0	0	0	0	0	0	0.0013	0	0
Bacteria;Proteobacteria;Gammaproteobacteria;Enterobacteriales;Enterobacteriaceae;Candidatus Hamiltonella;	0	0	0	0	0	0.0012	0	0	0	0	0
Bacteria;Proteobacteria;Gammaproteobacteria;Enterobacteriales;Enterobacteriaceae;Citrobacter;	0.0012	0	0	0	0.0009	0	0	0	0	0.0007	0
Bacteria;Proteobacteria;Gammaproteobacteria;Enterobacteriales;Enterobacteriaceae;Enterobacter;	0	0	0	0	0.0009	0	0	0	0	0	0
Bacteria;Proteobacteria;Gammaproteobacteria;Enterobacteriales;Enterobacteriaceae;Escherichia-Shigella;	0	0	0.0111	0.0012	0	0.0024	0	0	0	0.0007	0.0007
Bacteria;Proteobacteria;Gammaproteobacteria;Enterobacteriales;Enterobacteriaceae;Kosakonia;	0	0	0.0014	0.0023	0	0	0	0	0	0	0
Bacteria;Proteobacteria;Gammaproteobacteria;Enterobacteriales;Enterobacteriaceae;Plesiomonas;	0	0	0	0.0012	0	0	0	0	0	0	0
Bacteria;Proteobacteria;Gammaproteobacteria;Enterobacteriales;Enterobacteriaceae;Serratia;	0	0	0.0014	0	0	0	0.0021	0	0	0	0
Bacteria;Proteobacteria;Gammaproteobacteria;Enterobacteriales;Enterobacteriaceae;Sodalis;	0	0	0	0	0.0018	0	0	0	0	0	0
Bacteria;Proteobacteria;Gammaproteobacteria;Francisellales;Francisellaceae;Allofrancisella;	0	0	0	0	0.0009	0	0	0	0	0.0014	0
Bacteria;Proteobacteria;Gammaproteobacteria;Francisellales;Francisellaceae;Francisella;	0	0.0065	0.0042	0.0069	0.007	0.0049	0.0041	0.0017	0.0168	0.0156	0.0146
Bacteria;Proteobacteria;Gammaproteobacteria;Francisellales;Francisellaceae;[Caedibacter] taeniospiralis group;	0	0.0011	0	0.0012	0	0.0036	0.001	0	0	0.0021	0
Bacteria;Proteobacteria;Gammaproteobacteria;Francisellales;Francisellaceae;uncultured;	0	0.0022	0.0014	0.0035	0.0053	0.0109	0.0124	0	0.0129	0.0021	0.0029
Bacteria;Proteobacteria;Gammaproteobacteria;Ga0077536;	0.0632	0.0054	0.0709	0.0023	0.1524	0.0571	0.0908	0.0616	0.0065	0.0028	0.0022
Bacteria;Proteobacteria;Gammaproteobacteria;Gammaproteobacteria Incertae Sedis;Unknown Family;	0.0025	0	0	0.0012	0.0035	0.0049	0	0	0	0	0
Bacteria;Proteobacteria;Gammaproteobacteria;Gammaproteobacteria Incertae Sedis;Unknown Family;Alkalimarinus;	0	0	0	0	0	0	0	0.0009	0	0	0
Bacteria;Proteobacteria;Gammaproteobacteria;Gammaproteobacteria Incertae Sedis;Unknown Family;Candidatus Berkiella;	0.0025	0.0022	0.0014	0	0.0035	0	0	0.0026	0.0026	0	0
Bacteria;Proteobacteria;Gammaproteobacteria;Gammaproteobacteria Incertae Sedis;Unknown Family;Candidatus Carsonella;	0	0	0	0	0.0009	0	0	0	0	0	0.0007
Bacteria;Proteobacteria;Gammaproteobacteria;Gammaproteobacteria Incertae Sedis;Unknown Family;Wenzhouxiangella;	0	0	0	0	0.0018	0	0.001	0	0	0	0
Bacteria;Proteobacteria;Gammaproteobacteria;Gammaproteobacteria Incertae Sedis;Unknown Family;uncultured;	0.0037	0	0.0028	0	0.0044	0	0.001	0.0034	0	0	0.0007
Bacteria;Proteobacteria;Gammaproteobacteria;HOC36;	0.0012	0.0011	0.0139	0	0.0044	0.0049	0.0062	0.0009	0	0.0021	0
Bacteria;Proteobacteria;Gammaproteobacteria;Halothiobacillales;Halothiobacillaceae;uncultured;	0	0	0	0	0	0	0	0	0	0	0.0007
Bacteria;Proteobacteria;Gammaproteobacteria;HgCo23;	0.0136	0.0054	0.0362	0	0.0026	0.0243	0.0186	0.0137	0	0	0.0007
Bacteria;Proteobacteria;Gammaproteobacteria;HglApr721;	0	0	0.0014	0	0	0	0	0	0	0	0
Bacteria;Proteobacteria;Gammaproteobacteria;JTB23;	0.0322	0.0022	0.0765	0.0023	0.0625	0.0595	0.0578	0.0402	0.0026	0.0014	0.0015
Bacteria;Proteobacteria;Gammaproteobacteria;KI89A clade;	0.0694	0.1173	0.0737	0.3276	0.0317	0.0437	0.0763	0.0436	0.0685	0.1305	0.4778
Bacteria;Proteobacteria;Gammaproteobacteria;Legionellales;Legionellaceae;uncultured;	0.0037	0.0043	0.0056	0	0.0062	0.0012	0	0.0043	0.0155	0	0
Bacteria;Proteobacteria;Gammaproteobacteria;MBAE14;	0	0	0	0	0.0229	0.0012	0	0	0.0013	0	0.0007
Bacteria;Proteobacteria;Gammaproteobacteria;MBMPE27;	0	0.0033	0	0.0185	0	0	0	0	0.0052	0	0.0285
Bacteria;Proteobacteria;Gammaproteobacteria;Methylococcales;Cycloclasticaceae;Cycloclasticus;	0	0	0.0042	0.0012	0.0009	0	0	0	0.0013	0.0014	0
Bacteria;Proteobacteria;Gammaproteobacteria;Methylococcales;Methylomonaceae;Crenothrix;	0	0	0	0	0	0	0.001	0.0009	0	0.0014	0
Bacteria;Proteobacteria;Gammaproteobacteria;Methylococcales;Methylomonaceae;IheB2-23;	0.0012	0	0	0	0	0	0	0	0	0	0
Bacteria;Proteobacteria;Gammaproteobacteria;Methylococcales;Methylomonaceae;Marine Methylotrophic Group 2;	0	0	0	0.0046	0	0	0.0021	0	0	0	0
Bacteria;Proteobacteria;Gammaproteobacteria;Methylococcales;Methylomonaceae;Methylobacter;	0	0	0	0	0	0	0	0	0	0	0.0007
Bacteria;Proteobacteria;Gammaproteobacteria;Methylococcales;Methylomonaceae;Methylomarinum;	0	0	0	0	0	0.0012	0	0	0	0	0
Bacteria;Proteobacteria;Gammaproteobacteria;Methylococcales;Methylomonaceae;Methyloprofundus;	0.0012	0	0	0	0	0	0	0.0017	0	0	0
Bacteria;Proteobacteria;Gammaproteobacteria;Methylococcales;Methylomonaceae;Methylosarcina;	0	0	0	0.0023	0	0	0	0.0009	0	0	0
Bacteria;Proteobacteria;Gammaproteobacteria;Methylococcales;Methylomonaceae;Methylosoma;	0	0	0	0	0	0	0	0	0.0013	0	0
Bacteria;Proteobacteria;Gammaproteobacteria;Methylococcales;Methylomonaceae;Methylovulum;	0	0	0	0	0	0	0	0.0043	0	0	0
Bacteria;Proteobacteria;Gammaproteobacteria;Methylococcales;Methylomonaceae;Milano-WF1B-03;	0	0	0.0014	0.083	0.0009	0	0	0	0	0	0.1383
Bacteria;Proteobacteria;Gammaproteobacteria;Milano-WF1B-44;	0	0	0	0	0	0.0012	0	0	0	0	0
Bacteria;Proteobacteria;Gammaproteobacteria;Nitrococcales;Nitrococcaceae;Spiribacter;	0	0	0	0	0	0	0	0.0017	0	0	0
Bacteria;Proteobacteria;Gammaproteobacteria;Nitrosococcales;Methylophagaceae;	0.0012	0	0	0	0	0	0.0021	0	0	0	0
Bacteria;Proteobacteria;Gammaproteobacteria;Nitrosococcales;Methylophagaceae;Marine Methylotrophic Group 3;	0.0074	0.1151	0.0932	0.0219	0.0211	0.0036	0.1454	0.0068	0.044	0.1723	0.0205
Bacteria;Proteobacteria;Gammaproteobacteria;Nitrosococcales;Methylophagaceae;Methylophaga;	0.0211	0.0706	0.0807	0.0208	0.0255	0.0073	0.0887	0.0137	0.0194	0.0879	0.011
Bacteria;Proteobacteria;Gammaproteobacteria;Nitrosococcales;Methylophagaceae;uncultured;	0.202	2.1041	2.6427	0.7301	0.2519	0.1129	4.1378	0.2677	0.4318	4.4612	0.5327
Bacteria;Proteobacteria;Gammaproteobacteria;Nitrosococcales;Nitrosococcaceae;3PJM14;	0	0	0	0	0.0009	0	0	0	0	0	0
Bacteria;Proteobacteria;Gammaproteobacteria;Nitrosococcales;Nitrosococcaceae;AqS1;	0	0	0	0	0.0018	0.0024	0	0	0	0.0014	0
Bacteria;Proteobacteria;Gammaproteobacteria;Nitrosococcales;Nitrosococcaceae;Cm1-21;	0	0.0022	0.007	0	0.0026	0.0012	0.0031	0	0	0	0
Bacteria;Proteobacteria;Gammaproteobacteria;Nitrosococcales;Nitrosococcaceae;FS142-36B-02;	0	0	0.0028	0	0.0026	0.0024	0	0.0009	0	0	0
Bacteria;Proteobacteria;Gammaproteobacteria;Nitrosococcales;Nitrosococcaceae;MSB-1D1;	0	0	0.0014	0	0.0026	0	0	0	0	0	0
Bacteria;Proteobacteria;Gammaproteobacteria;OM182 clade;	0.8588	0.7473	1.0571	0.4625	0.8341	0.5027	1.2562	0.4901	0.8171	0.5056	0.3058
Bacteria;Proteobacteria;Gammaproteobacteria;Oceanospirillales;Alcanivoracaceae;Alcanivorax;	0.0037	0	0.0014	0.0012	0.0291	0.0024	0.0041	0.0077	0	0	0.0037
Bacteria;Proteobacteria;Gammaproteobacteria;Oceanospirillales;Endozoicomonadaceae;Endozoicomonas;	0	0.013	0	0.0058	0	0.0012	0.0227	0	0.0129	0.0319	0.0029
Bacteria;Proteobacteria;Gammaproteobacteria;Oceanospirillales;Halomonadaceae;Chromohalobacter;	0	0	0	0	0	0	0	0	0	0.0007	0
Bacteria;Proteobacteria;Gammaproteobacteria;Oceanospirillales;Halomonadaceae;Cobetia;	0	0	0	0	0	0	0.001	0	0	0	0
Bacteria;Proteobacteria;Gammaproteobacteria;Oceanospirillales;Halomonadaceae;Halomonas;	0.0012	0	0	0	0.0009	0	0.001	0.0026	0.0026	0.0007	0
Bacteria;Proteobacteria;Gammaproteobacteria;Oceanospirillales;Halomonadaceae;uncultured;	0	0	0	0	0.0009	0	0	0	0	0	0
Bacteria;Proteobacteria;Gammaproteobacteria;Oceanospirillales;Kangiellaceae;Kangiella;	0	0	0	0	0	0	0	0.0009	0	0	0
Bacteria;Proteobacteria;Gammaproteobacteria;Oceanospirillales;Kangiellaceae;uncultured;	0.0124	0.0011	0.0111	0.0104	0.0079	0.0182	0.0196	0.0359	0	0.0163	0.0037
Bacteria;Proteobacteria;Gammaproteobacteria;Oceanospirillales;Litoricolaceae;Litoricola;	0.0223	0.0065	0.0125	0.0012	0.0176	0.0146	0.0206	0.0231	0.0013	0.0106	0.0015
Bacteria;Proteobacteria;Gammaproteobacteria;Oceanospirillales;Marinomonadaceae;Marinomonas;	0.0012	0	0	0	0	0.0049	0.001	0.0009	0	0.0007	0.0007
Bacteria;Proteobacteria;Gammaproteobacteria;Oceanospirillales;Nitrincolaceae;	0	0	0	0	0	0	0.001	0	0	0	0
Bacteria;Proteobacteria;Gammaproteobacteria;Oceanospirillales;Nitrincolaceae;Amphritea;	0	0	0.0028	0.0646	0	0	0	0	0	0	0.0161
Bacteria;Proteobacteria;Gammaproteobacteria;Oceanospirillales;Nitrincolaceae;Marinobacterium;	0	0.0022	0	0	0.0026	0	0	0.0026	0	0.0007	0.0007
Bacteria;Proteobacteria;Gammaproteobacteria;Oceanospirillales;Nitrincolaceae;Motiliproteus;	0	0	0	0.0012	0	0	0	0	0	0	0.0007
Bacteria;Proteobacteria;Gammaproteobacteria;Oceanospirillales;Nitrincolaceae;Neptuniibacter;	0	0	0	0.0012	0	0	0.0052	0	0.0013	0	0
Bacteria;Proteobacteria;Gammaproteobacteria;Oceanospirillales;Nitrincolaceae;Neptunomonas;	0	0	0	0.0012	0	0	0	0	0	0	0.0007
Bacteria;Proteobacteria;Gammaproteobacteria;Oceanospirillales;Nitrincolaceae;uncultured;	8.4453	6.7228	7.2299	4.4278	3.8041	9.0193	7.8352	5.4793	8.0457	9.1402	4.0836
Bacteria;Proteobacteria;Gammaproteobacteria;Oceanospirillales;Oleiphilaceae;Oleiphilus;	0.0025	0.0011	0	0.015	0	0.0049	0	0	0.0078	0.0007	0.0007
Bacteria;Proteobacteria;Gammaproteobacteria;Oceanospirillales;Pseudohongiellaceae;BIyi10;	0	0	0	0	0	0	0	0	0	0	0.0007
Bacteria;Proteobacteria;Gammaproteobacteria;Oceanospirillales;Pseudohongiellaceae;Pseudohongiella;	1.3123	0.7593	1.2198	0.752	1.574	1.1402	1.5388	1.425	0.5598	0.4822	0.5941
Bacteria;Proteobacteria;Gammaproteobacteria;Oceanospirillales;SS1-B-06-26;	0	0	0	0	0.0018	0	0	0.0009	0.0013	0	0
Bacteria;Proteobacteria;Gammaproteobacteria;Oceanospirillales;Saccharospirillaceae;	0	0	0	0.0012	0	0	0	0	0	0	0.0051
Bacteria;Proteobacteria;Gammaproteobacteria;Oceanospirillales;Saccharospirillaceae;Oceaniserpentilla;	0	0.0022	0	0	0	0	0	0	0	0	0
Bacteria;Proteobacteria;Gammaproteobacteria;Oceanospirillales;Saccharospirillaceae;Oceanobacter;	0	0	0	0	0.0009	0	0	0	0	0	0
Bacteria;Proteobacteria;Gammaproteobacteria;Oceanospirillales;Saccharospirillaceae;Oleibacter;	0	0	0	0	0	0	0	0	0	0	0.0007
Bacteria;Proteobacteria;Gammaproteobacteria;Oceanospirillales;Saccharospirillaceae;Oleispira;	0.0161	0	0.0014	0	0.0026	0.0049	0.001	0.0009	0.0013	0	0.0015
Bacteria;Proteobacteria;Gammaproteobacteria;Oceanospirillales;Saccharospirillaceae;Reinekea;	0.0112	0.0315	0.0223	0.0012	0	0.0121	0.0021	0.0257	0.0039	0.8297	0
Bacteria;Proteobacteria;Gammaproteobacteria;Oceanospirillales;Saccharospirillaceae;Spongiispira;	0	0.0011	0	0	0	0	0	0	0	0	0
Bacteria;Proteobacteria;Gammaproteobacteria;Oceanospirillales;Saccharospirillaceae;Thalassolituus;	0	0.0011	0	0	0.0009	0	0	0	0.0026	0	0
Bacteria;Proteobacteria;Gammaproteobacteria;Oceanospirillales;Saccharospirillaceae;uncultured;	0.0012	0.0087	0.0014	0.0046	0	0.0024	0.0031	0.0009	0.0103	0.0028	0.0088
Bacteria;Proteobacteria;Gammaproteobacteria;P0X4b2H11;	0	0	0	0	0.0009	0	0	0	0	0	0
Bacteria;Proteobacteria;Gammaproteobacteria;Piscirickettsiales;Piscirickettsiaceae;Candidatus Endoecteinascidia;	0	0	0.0042	0	0.0018	0.0012	0.0072	0	0	0	0
Bacteria;Proteobacteria;Gammaproteobacteria;Piscirickettsiales;Piscirickettsiaceae;Piscirickettsia;	0.0012	0	0.0028	0	0.0009	0	0.001	0.0009	0	0	0
Bacteria;Proteobacteria;Gammaproteobacteria;Pseudomonadales;Moraxellaceae;Acinetobacter;	0	0	0	0	0	0.0036	0	0	0	0	0
Bacteria;Proteobacteria;Gammaproteobacteria;Pseudomonadales;Moraxellaceae;Cavicella;	0	0	0	0	0.0009	0	0	0	0	0	0
Bacteria;Proteobacteria;Gammaproteobacteria;Pseudomonadales;Moraxellaceae;Enhydrobacter;	0	0	0	0	0.0009	0	0	0.0009	0	0.0014	0.0007
Bacteria;Proteobacteria;Gammaproteobacteria;Pseudomonadales;Moraxellaceae;Psychrobacter;	0.0099	0.0087	0.0028	0	0.022	0.0571	0.0021	0.0103	0.0039	0.0014	0.0022
Bacteria;Proteobacteria;Gammaproteobacteria;Pseudomonadales;Moraxellaceae;[Agitococcus] lubricus group;	0	0	0	0	0	0.0012	0	0	0	0	0
Bacteria;Proteobacteria;Gammaproteobacteria;Pseudomonadales;Moraxellaceae;uncultured;	0	0	0.0014	0	0	0	0	0.0051	0	0	0
Bacteria;Proteobacteria;Gammaproteobacteria;Pseudomonadales;Pseudomonadaceae;Oblitimonas;	0	0	0	0	0	0	0.001	0	0	0	0
Bacteria;Proteobacteria;Gammaproteobacteria;Pseudomonadales;Pseudomonadaceae;Pseudomonas;	0.0347	0.0293	0.0362	0.0323	0.0828	0.0644	0.0691	0.0359	0.0737	0.0362	0.0432
Bacteria;Proteobacteria;Gammaproteobacteria;SAR86 clade;	5.2493	1.7195	4.7652	4.4139	6.9054	4.0021	5.3878	5.6932	2.9788	1.6707	4.0228
Bacteria;Proteobacteria;Gammaproteobacteria;SZB50;	0	0	0.0014	0	0	0	0	0	0	0	0
Bacteria;Proteobacteria;Gammaproteobacteria;Salinisphaerales;Solimonadaceae;Fontimonas;	0	0	0	0.0023	0	0	0	0	0	0	0
Bacteria;Proteobacteria;Gammaproteobacteria;Steroidobacterales;Woeseiaceae;JTB255 marine benthic group;	0	0.0022	0	0	0	0	0	0	0	0	0
Bacteria;Proteobacteria;Gammaproteobacteria;Steroidobacterales;Woeseiaceae;Woeseia;	0.2193	0.0391	0.2086	0.0358	0.2255	0.1445	0.1856	0.1523	0.137	0.0078	0.0395
Bacteria;Proteobacteria;Gammaproteobacteria;Tenderiales;Tenderiaceae;Candidatus Tenderia;	0.0012	0.0413	0.0111	0.0173	0.0211	0.0024	0.0072	0.006	0.0116	0.0021	0.0139
Bacteria;Proteobacteria;Gammaproteobacteria;Thiohalorhabdales;Thiohalorhabdaceae;Granulosicoccus;	0	0	0	0	0	0	0.0062	0	0	0	0
Bacteria;Proteobacteria;Gammaproteobacteria;Thiohalorhabdales;Thiohalorhabdaceae;Methylohalomonas;	0	0	0	0	0.0044	0.0012	0.001	0.0017	0	0	0
Bacteria;Proteobacteria;Gammaproteobacteria;Thiohalorhabdales;Thiohalorhabdaceae;uncultured;	0.0273	0.013	0.0403	0.0507	0.0573	0.017	0.0113	0.0137	0.0478	0.0014	0.0424
Bacteria;Proteobacteria;Gammaproteobacteria;Thiomicrospirales;Thioglobaceae;Candidatus Ruthia;	0	0	0	0	0.0035	0	0	0	0	0	0
Bacteria;Proteobacteria;Gammaproteobacteria;Thiomicrospirales;Thioglobaceae;Candidatus Thioglobus;	0	0	0	0	0.0009	0	0	0	0	0	0
Bacteria;Proteobacteria;Gammaproteobacteria;Thiomicrospirales;Thioglobaceae;SUP05 cluster;	6.2791	1.0667	5.0907	1.5213	8.3516	6.2958	7.0967	7.0403	1.7183	2.2047	1.3302
Bacteria;Proteobacteria;Gammaproteobacteria;Thiomicrospirales;Thiomicrospiraceae;Thiomicrorhabdus;	0	0	0	0	0.0018	0	0	0.0009	0	0	0
Bacteria;Proteobacteria;Gammaproteobacteria;Thiomicrospirales;Thiomicrospiraceae;Thiomicrospira;	0	0	0	0	0	0	0.0196	0.0009	0	0	0
Bacteria;Proteobacteria;Gammaproteobacteria;Thiomicrospirales;Thiomicrospiraceae;endosymbionts;	0.0012	0	0.0042	0.0023	0.0035	0	0	0.0017	0.0013	0	0
Bacteria;Proteobacteria;Gammaproteobacteria;Thiotrichales;Thiotrichaceae;	0.0124	0.0304	0	0.0554	0.0123	0.0158	0.0041	0.0094	0.0091	0	0.0285
Bacteria;Proteobacteria;Gammaproteobacteria;Thiotrichales;Thiotrichaceae;Leucothrix;	0.005	0	0.0083	0	0	0.0036	0.001	0	0	0	0
Bacteria;Proteobacteria;Gammaproteobacteria;Thiotrichales;Thiotrichaceae;uncultured;	0.342	0.5301	0.4687	0.4856	0.502	0.1821	0.3321	0.1343	0.234	0.1128	0.3658
Bacteria;Proteobacteria;Gammaproteobacteria;UBA10353 marine group;	0.4449	0.088	0.4242	0.0911	0.5426	0.4456	0.5549	0.5064	0.1034	0.173	0.0505
Bacteria;Proteobacteria;Gammaproteobacteria;UBA4486;	0.0087	0.0022	0.0236	0.0046	0.0458	0.0121	0.0237	0.0171	0.0039	0.0014	0.0007
Bacteria;Proteobacteria;Gammaproteobacteria;Vibrionales;Vibrionaceae;Aliivibrio;	0	0	0.0014	0	0	0	0.001	0	0	0	0
Bacteria;Proteobacteria;Gammaproteobacteria;Vibrionales;Vibrionaceae;Catenococcus;	0.0012	0	0.007	0.0012	0.0044	0.0061	0.0031	0	0.0039	0.0021	0
Bacteria;Proteobacteria;Gammaproteobacteria;Vibrionales;Vibrionaceae;Enterovibrio;	0.0012	0	0	0	0	0	0	0	0	0	0.0007
Bacteria;Proteobacteria;Gammaproteobacteria;Vibrionales;Vibrionaceae;Photobacterium;	0.0012	0	0.0153	0.0012	0	0	0.0052	0.0017	0.0013	0.0014	0.0051
Bacteria;Proteobacteria;Gammaproteobacteria;Vibrionales;Vibrionaceae;Vibrio;	0.0012	0	0	0	0.0018	0	0	0	0.0013	0	0
Bacteria;Proteobacteria;Gammaproteobacteria;WN-HWB-116;	0.0012	0	0	0	0	0	0	0	0	0	0
Bacteria;Proteobacteria;Gammaproteobacteria;Xanthomonadales;Rhodanobacteraceae;Dokdonella;	0.005	0	0	0	0.0053	0	0	0	0	0	0
Bacteria;Proteobacteria;Gammaproteobacteria;Xanthomonadales;Rhodanobacteraceae;Rhodanobacter;	0	0.0011	0	0	0	0	0	0	0	0	0
Bacteria;Proteobacteria;Gammaproteobacteria;Xanthomonadales;Xanthomonadaceae;Lysobacter;	0	0	0	0	0	0.0049	0	0	0	0	0
Bacteria;Proteobacteria;Gammaproteobacteria;Xanthomonadales;Xanthomonadaceae;Pseudoxanthomonas;	0	0	0.0028	0	0	0.0024	0.0031	0	0.0026	0.0014	0
Bacteria;Proteobacteria;Gammaproteobacteria;Xanthomonadales;Xanthomonadaceae;Stenotrophomonas;	0	0	0	0	0	0	0	0	0	0	0.0007
Bacteria;Proteobacteria;Gammaproteobacteria;Xanthomonadales;Xanthomonadaceae;uncultured;	0	0.0011	0	0	0	0	0.001	0	0.0013	0.0014	0
Bacteria;Proteobacteria;Gammaproteobacteria;pItb-vmat-80;	0	0	0	0	0.0009	0.0024	0	0	0.0013	0	0
Bacteria;Proteobacteria;Gammaproteobacteria;uncultured;	0	0.0011	0.0014	0	0.0018	0	0.001	0	0	0.0014	0
Bacteria;Spirochaetes;Leptospirae;Leptospirales;Leptospiraceae;Leptospira;	0	0	0	0	0	0	0	0.0009	0	0	0
Bacteria;Spirochaetes;Spirochaetia;Spirochaetales;Spirochaetaceae;Sediminispirochaeta;	0.0136	0.0022	0	0.0023	0.0044	0.0024	0.0113	0.0094	0	0	0.0044
Bacteria;Spirochaetes;Spirochaetia;Spirochaetales;Spirochaetaceae;Spirochaeta 2;	0	0	0.0014	0	0	0	0	0	0	0	0
Bacteria;Spirochaetes;Spirochaetia;Spirochaetales;Spirochaetaceae;Treponema 2;	0	0.0011	0	0	0	0	0	0	0	0	0
Bacteria;Tenericutes;Mollicutes;Entomoplasmatales;Entomoplasmatales Incertae Sedis;Candidatus Hepatoplasma;	0.0012	0.0011	0	0	0	0.0024	0	0.0009	0	0	0.0015
Bacteria;Verrucomicrobia;Verrucomicrobiae;Arctic97B-4 marine group;	0.0558	0.0022	0.1099	0	0.2228	0.085	0.1207	0.0393	0.0065	0.0057	0.0044
Bacteria;Verrucomicrobia;Verrucomicrobiae;Chthoniobacterales;Chthoniobacteraceae;Chthoniobacter;	0	0.0011	0	0	0	0	0	0	0	0	0
Bacteria;Verrucomicrobia;Verrucomicrobiae;Chthoniobacterales;Chthoniobacteraceae;LD29;	0	0	0	0	0.0009	0	0	0	0	0	0
Bacteria;Verrucomicrobia;Verrucomicrobiae;Opitutales;Opitutaceae;Opitutus;	0	0	0	0	0.0009	0	0	0	0	0	0
Bacteria;Verrucomicrobia;Verrucomicrobiae;Opitutales;Puniceicoccaceae;A714019;	0	0	0	0	0.0009	0	0.0093	0.0009	0	0	0
Bacteria;Verrucomicrobia;Verrucomicrobiae;Opitutales;Puniceicoccaceae;Cerasicoccus;	0	0	0	0	0	0	0.001	0.0017	0	0	0
Bacteria;Verrucomicrobia;Verrucomicrobiae;Opitutales;Puniceicoccaceae;Coraliomargarita;	0.0012	0	0	0.0588	0	0	0.001	0	0.0052	0	0.0351
Bacteria;Verrucomicrobia;Verrucomicrobiae;Opitutales;Puniceicoccaceae;Lentimonas;	0.0124	1.0059	0.1113	1.5501	0.0009	0.0073	0.0536	0.0111	1.0576	0.3638	0.8692
Bacteria;Verrucomicrobia;Verrucomicrobiae;Opitutales;Puniceicoccaceae;MB11C04 marine group;	0.0161	0.0434	0.0139	0.0196	0.1462	0.0316	0.0309	0.0248	0.0789	0.0014	0.0073
Bacteria;Verrucomicrobia;Verrucomicrobiae;Opitutales;Puniceicoccaceae;Pelagicoccus;	0.0099	0	0.0167	0.0046	0.0528	0.0109	0.0258	0.0068	0.0013	0.0014	0
Bacteria;Verrucomicrobia;Verrucomicrobiae;Opitutales;Puniceicoccaceae;Verruc-01;	0	0.0022	0	0.0023	0.0018	0.0049	0.001	0	0.0065	0	0
Bacteria;Verrucomicrobia;Verrucomicrobiae;Pedosphaerales;Pedosphaeraceae;	0	0	0	0	0.0176	0	0.0062	0.0026	0	0	0
Bacteria;Verrucomicrobia;Verrucomicrobiae;Pedosphaerales;Pedosphaeraceae;SCGC AAA164-E04;	0	0	0	0	0.0018	0.0012	0.0021	0	0	0	0.0007
Bacteria;Verrucomicrobia;Verrucomicrobiae;Verrucomicrobiales;DEV007;	0	0	0.0042	0	0	0	0.0072	0	0	0	0.0015
Bacteria;Verrucomicrobia;Verrucomicrobiae;Verrucomicrobiales;Rubritaleaceae;Luteolibacter;	0.0062	8.992	0.0042	1.1049	0.0026	0	0.0041	0.0163	6.5407	0.0014	0.2224
Bacteria;Verrucomicrobia;Verrucomicrobiae;Verrucomicrobiales;Rubritaleaceae;Persicirhabdus;	0	0.0043	0	0	0.0009	0	0	0	0	0	0
Bacteria;Verrucomicrobia;Verrucomicrobiae;Verrucomicrobiales;Rubritaleaceae;Roseibacillus;	0.0669	0.1075	0.0807	0.7312	0.3928	0.0146	0.0485	0.0436	0.1732	0.0113	0.3702
Bacteria;Verrucomicrobia;Verrucomicrobiae;Verrucomicrobiales;Rubritaleaceae;Rubritalea;	0.0397	0.0109	0.0835	0.1119	0.0044	0.0073	0.0052	0.0051	0.0634	0.0007	0.0285
Bacteria;Verrucomicrobia;Verrucomicrobiae;Verrucomicrobiales;Verrucomicrobiaceae;Roseimicrobium;	0	0	0	0	0.0009	0	0.001	0	0	0	0
Eukaryota;	0	0	0	0.0012	0	0	0.0021	0	0.0052	0	0.0029
Eukaryota;Archaeplastida;Chloroplastida;Charophyta;Phragmoplastophyta;Streptophyta;Embryophyta;Anthocerotophyta;Dendrocerotales;Nothoceros;	0.0012	0	0	0	0	0	0	0	0	0	0
Eukaryota;Archaeplastida;Chloroplastida;Charophyta;Phragmoplastophyta;Streptophyta;Embryophyta;Tracheophyta;Spermatophyta;Magnoliophyta;Cucurbitales;Cucumis;	0	0	0	0	0	0	0	0	0	0	0.0007
Eukaryota;Archaeplastida;Chloroplastida;Charophyta;Phragmoplastophyta;Streptophyta;Embryophyta;Tracheophyta;Spermatophyta;Magnoliophyta;Cucurbitales;Cucurbita;	0	0	0	0	0	0	0	0	0	0	0.0007
Eukaryota;Archaeplastida;Chloroplastida;Charophyta;Phragmoplastophyta;Streptophyta;Embryophyta;Tracheophyta;Spermatophyta;Magnoliophyta;Liliopsida;Poales;Saccharum officinarum complex;	0	0	0	0	0	0	0	0	0	0.0014	0
Eukaryota;Archaeplastida;Chloroplastida;Charophyta;Phragmoplastophyta;Streptophyta;Embryophyta;Tracheophyta;Spermatophyta;Magnoliophyta;Santalales;Mystropetalon;	0	0	0	0	0	0.0012	0	0	0	0	0
Eukaryota;Archaeplastida;Chloroplastida;Charophyta;Phragmoplastophyta;Streptophyta;Embryophyta;Tracheophyta;Spermatophyta;Magnoliophyta;Solanales;Petunia;	0	0	0	0	0	0	0	0.0009	0	0	0
Eukaryota;Archaeplastida;Chloroplastida;Charophyta;Phragmoplastophyta;Streptophyta;Embryophyta;Tracheophyta;Spermatophyta;Pinophyta;	0.0099	0.0011	0	0	0	0.0267	0.0072	0.0103	0	0.0014	0.0007
Eukaryota;Archaeplastida;Chloroplastida;Chlorophyta;Chlorophyceae;	0	0	0	0.0012	0	0	0	0	0	0	0
Eukaryota;Archaeplastida;Chloroplastida;Chlorophyta;Chlorophyceae;Chlamydomonadales;Vitreochlamys;	0	0	0	0	0	0	0	0	0	0	0.0007
Eukaryota;Archaeplastida;Chloroplastida;Chlorophyta;Clade IX;	0	0	0	0	0	0	0	0	0	0	0.0007
Eukaryota;Archaeplastida;Chloroplastida;Chlorophyta;Clade VII;Subclade B;	0	0	0	0.0023	0	0	0	0	0	0	0
Eukaryota;Archaeplastida;Chloroplastida;Chlorophyta;Mamiellophyceae;	0.0012	0	0	0	0.0009	0	0	0	0	0.0007	0
Eukaryota;Archaeplastida;Chloroplastida;Chlorophyta;Mamiellophyceae;DSGM-81;	0	0.0011	0	0.0023	0	0	0	0.0009	0.0013	0	0
Eukaryota;Archaeplastida;Chloroplastida;Chlorophyta;Mamiellophyceae;Dolichomastigales;Crustomastix;	0	0	0	0.0012	0.0009	0	0	0	0	0	0
Eukaryota;Archaeplastida;Chloroplastida;Chlorophyta;Mamiellophyceae;Mamiellales;Bathycoccus;	0	0	0.0028	0.0023	0.0185	0.0012	0.0103	0.0163	0	0.0007	0.0154
Eukaryota;Archaeplastida;Chloroplastida;Chlorophyta;Mamiellophyceae;Mamiellales;Micromonas;	0.3148	0.0782	0.1572	0.015	0.4378	0.5488	0.1073	0.8955	0.0259	0.4078	0.0424
Eukaryota;Archaeplastida;Chloroplastida;Chlorophyta;Mamiellophyceae;Mamiellales;Ostreococcus;	0	0.0011	0	0	0.0035	0	0	0	0	0	0.0015
Eukaryota;Archaeplastida;Chloroplastida;Chlorophyta;Pedinophyceae;Pedinomonadales;Pedinomonas;	0	0	0	0	0	0	0	0	0	0.0014	0
Eukaryota;Archaeplastida;Chloroplastida;Chlorophyta;Prasinophytae;	0.0074	0	0	0	0.0062	0.0631	0.001	0.0145	0	0.0078	0.0044
Eukaryota;Archaeplastida;Chloroplastida;Chlorophyta;Prasinophytae;Pseudoscourfieldiales;Prasinoderma;	0	0	0	0	0	0.0012	0.001	0	0.0013	0.0121	0
Eukaryota;Archaeplastida;Chloroplastida;Chlorophyta;Prasinophytae;Pyramimonadales;Pyramimonas;	0	0	0.0014	0	0	0.0036	0	0.0017	0	0.0035	0.0007
Eukaryota;Archaeplastida;Chloroplastida;Chlorophyta;Trebouxiophyceae;	0	0	0	0	0.0009	0	0	0	0.0013	0.0007	0
Eukaryota;Archaeplastida;Rhodophyceae;Florideophycidae;Rhodymeniophycidae;	0	0	0	0	0	0	0	0	0	0.0014	0
Eukaryota;Centrohelida;	0	0.0022	0.0014	0.0012	0	0	0	0.0009	0	0	0
Eukaryota;Cryptophyceae;Cryptomonadales;	0	0	0	0.0023	0	0.0073	0.0031	0.0017	0	0.0007	0.0037
Eukaryota;Cryptophyceae;Cryptomonadales;Cryptomonas;	0	0	0	0	0	0	0	0.0009	0	0	0
Eukaryota;Cryptophyceae;Cryptomonadales;Geminigera;	0	0	0	0.0023	0	0.0012	0	0.0009	0	0	0.0015
Eukaryota;Cryptophyceae;Cryptomonadales;Guillardia;	0	0	0.0042	0	0	0	0	0	0	0	0
Eukaryota;Cryptophyceae;Cryptomonadales;Hemiselmis;	0	0	0	0	0	0	0.001	0	0	0	0
Eukaryota;Cryptophyceae;Cryptomonadales;Plagioselmis;	0.0037	0	0	0.0023	0.0018	0	0.0021	0.0009	0	0	0.0022
Eukaryota;Cryptophyceae;Cryptomonadales;Rhodomonas;	0.0012	0	0	0.0069	0	0.0012	0	0	0	0	0.0015
Eukaryota;Cryptophyceae;Cryptomonadales;Teleaulax;	0.0025	0	0.0028	0.0069	0	0.0085	0.0041	0.0111	0.0013	0.0035	0.0227
Eukaryota;Cryptophyceae;Cryptomonadales;uncultured;	0.0409	0	0.0167	0.0023	0.0062	0.051	0.0237	0.0086	0	0.0021	0.011
Eukaryota;Cryptophyceae;Kathablepharidae;Leucocryptos;	0	0	0.0014	0.0046	0	0	0	0	0	0.0007	0.0015
Eukaryota;Cryptophyceae;Kathablepharidae;uncultured;	0	0	0	0	0	0.0012	0	0	0	0	0
Eukaryota;Cryptophyceae;uncultured;	0	0.0065	0	0	0.0009	0	0	0	0.0026	0.0007	0.0022
Eukaryota;Excavata;Discoba;Discicristata;Euglenozoa;Diplonemea;Diplonema;	0.0012	0	0	0	0	0	0	0	0	0	0
Eukaryota;Excavata;Discoba;Discicristata;Euglenozoa;Diplonemea;SCM38C39 marine group;	0.0124	0.0011	0.0056	0.0104	0.0026	0	0.0093	0.0017	0.0065	0	0.0124
Eukaryota;Excavata;Discoba;Discicristata;Euglenozoa;Kinetoplastea;Incertae Sedis;Hemistasia;	0	0.0022	0	0	0	0.0012	0	0	0	0	0
Eukaryota;Excavata;Discoba;Discicristata;Euglenozoa;Kinetoplastea;Metakinetoplastina;Neobodonida;Dimastigella;	0	0	0	0	0	0	0	0	0	0	0.0007
Eukaryota;Excavata;Discoba;Discicristata;Euglenozoa;Kinetoplastea;Metakinetoplastina;Neobodonida;Neobodo;	0	0.0011	0	0.0035	0	0	0.001	0	0	0	0.0007
Eukaryota;Excavata;Discoba;Jakobida;	0.0012	0.0011	0.0028	0.0115	0.0009	0.0012	0.0021	0	0.0052	0	0.0029
Eukaryota;Excavata;Discoba;Jakobida;RM1-SGM49;	0.0012	0	0.0028	0	0	0	0	0	0	0	0
Eukaryota;Excavata;Discoba;Jakobida;uncultured;	0	0	0	0	0.0009	0.0024	0	0	0	0	0
Eukaryota;Haptophyta;	0	0	0.0028	0.0023	0.0009	0.0012	0	0.0009	0	0	0
Eukaryota;Haptophyta;Pav3;	0.0012	0	0	0.0035	0.0009	0	0.0021	0	0	0	0.008
Eukaryota;Haptophyta;Pavlovophyceae;AA5F1;	0	0	0	0	0	0	0.001	0	0	0	0
Eukaryota;Haptophyta;Prymnesiophyceae;	0	0	0	0	0	0	0	0	0.0013	0	0
Eukaryota;Haptophyta;Prymnesiophyceae;Coccolithales;Coronosphaera;	0.0012	0.0011	0	0.0035	0.0009	0	0	0	0.0026	0.0057	0.0015
Eukaryota;Haptophyta;Prymnesiophyceae;Coccolithales;Pleurochrysis;	0	0	0	0	0	0	0	0	0	0.0021	0
Eukaryota;Haptophyta;Prymnesiophyceae;Isochrysidales;Emiliania;	0	0	0	0.0012	0	0	0	0	0	0	0
Eukaryota;Haptophyta;Prymnesiophyceae;Isochrysidales;Isochrysis;	0	0	0	0.0012	0	0	0	0	0	0	0
Eukaryota;Haptophyta;Prymnesiophyceae;Phaeocystis;	0.3457	0.5008	0.6676	1.369	0.1841	0.1506	0.4847	0.0898	0.2857	0.8028	1.1246
Eukaryota;Haptophyta;Prymnesiophyceae;Prymnesiales;	0	0	0	0	0.0009	0	0	0	0	0	0.0015
Eukaryota;Haptophyta;Prymnesiophyceae;Prymnesiales;AI5F14RJ2A07;	0	0	0	0	0.0009	0	0	0	0	0	0
Eukaryota;Haptophyta;Prymnesiophyceae;Prymnesiales;Braarudosphaera;	0	0	0	0	0	0	0	0.0009	0	0.0043	0
Eukaryota;Haptophyta;Prymnesiophyceae;Prymnesiales;Chrysochromulina;	0.0297	0.0043	0.0139	0.0046	0.0106	0.0146	0.0052	0.0043	0.0052	0.0092	0.011
Eukaryota;Haptophyta;Prymnesiophyceae;Prymnesiales;Chrysoculter;	0	0	0.0014	0.0012	0	0	0	0	0	0.0057	0.0015
Eukaryota;Haptophyta;Prymnesiophyceae;Prymnesiales;Haptolina;	0.0025	0.0011	0.0056	0.0058	0.0018	0.0036	0	0.0026	0	0.0007	0
Eukaryota;Haptophyta;Prymnesiophyceae;Prymnesiales;OLI16029;	0	0.0011	0.0028	0.0023	0.0035	0.0073	0.0093	0.0043	0.0026	0.0078	0.0015
Eukaryota;Haptophyta;Prymnesiophyceae;Prymnesiales;OLI51059;	0.0074	0	0	0.0012	0	0.0012	0.0021	0	0	0.0014	0.0015
Eukaryota;Haptophyta;Prymnesiophyceae;Prymnesiales;Prymnesium;	0.0012	0.0022	0	0.0046	0	0	0.001	0.0009	0	0.0021	0.0029
Eukaryota;Haptophyta;Prymnesiophyceae;Prymnesiales;uncultured;	0	0	0	0	0	0.0012	0	0	0.0013	0	0
Eukaryota;Haptophyta;Prymnesiophyceae;SGUH624;	0.0235	0.0304	0.057	0.1292	0.0238	0.0097	0.0371	0.006	0.0375	0.0468	0.0783
Eukaryota;Haptophyta;Prymnesiophyceae;uncultured;	0	0	0	0.0012	0	0	0	0	0	0	0
Eukaryota;Haptophyta;T58;	0	0	0	0	0.0044	0	0.0062	0	0	0	0
Eukaryota;Incertae Sedis;Breviatea;NAMAKO-2;	0	0	0	0	0	0	0	0	0	0.0035	0
Eukaryota;Incertae Sedis;Palpitomonas;	0.0062	0	0	0	0.0044	0.0012	0.0031	0.0026	0	0	0
Eukaryota;Incertae Sedis;Telonema;	0.0397	0.0185	0.0097	0.0173	0.0097	0.0231	0.0443	0.0145	0.0052	0.0128	0.0124
Eukaryota;Opisthokonta;Holozoa;Choanoflagellida;Acanthoecida;Acanthoecidae;Pleurasiga;	0	0	0	0.0012	0.0018	0.0012	0	0	0	0	0.0007
Eukaryota;Opisthokonta;Holozoa;Choanoflagellida;Acanthoecida;Stephanoecidae;	0	0	0	0	0	0	0.001	0	0	0	0
Eukaryota;Opisthokonta;Holozoa;Choanoflagellida;Acanthoecida;Stephanoecidae;Bicosta;	0.0322	0.0011	0.0097	0.0219	0.0044	0.0182	0.0062	0.0017	0.0194	0.0177	0.0146
Eukaryota;Opisthokonta;Holozoa;Choanoflagellida;Acanthoecida;Stephanoecidae;Calliacantha;	0.0012	0.0022	0	0	0.0009	0	0.001	0	0	0	0
Eukaryota;Opisthokonta;Holozoa;Choanoflagellida;Acanthoecida;Stephanoecidae;Diaphanoeca;	0.0669	0.0011	0.0028	0.0104	0.0053	0.0146	0.0083	0.0026	0.0026	0.0078	0.0029
Eukaryota;Opisthokonta;Holozoa;Choanoflagellida;Acanthoecida;Stephanoecidae;Marine Choanoflagellates 1;	0	0	0	0	0.0009	0	0	0	0.0013	0.0028	0
Eukaryota;Opisthokonta;Holozoa;Choanoflagellida;Craspedida;Codosigidae;Freshwater Choanoflagellates 1;	0	0	0	0.0012	0	0	0	0	0	0	0
Eukaryota;Opisthokonta;Holozoa;Choanoflagellida;Craspedida;Codosigidae;Lagenoeca;	0.0012	0.0033	0	0	0	0	0	0	0.0013	0.0177	0
Eukaryota;Opisthokonta;Holozoa;Filasterea;Ministeriida;Capsasporidae;Marine Group;	0	0	0	0.0069	0	0	0	0	0.0013	0	0.008
Eukaryota;Opisthokonta;Holozoa;Metazoa (Animalia);Eumetazoa;Bilateria;Annelida;	0	0	0	0.0046	0	0	0	0	0.0349	0	0.0351
Eukaryota;Opisthokonta;Holozoa;Metazoa (Animalia);Eumetazoa;Bilateria;Arthropoda;Crustacea;Maxillopoda;Copepoda;Calanoida;	0	0	0.0028	0	0.0009	0	0	0	0	0	0.0015
Eukaryota;Opisthokonta;Holozoa;Metazoa (Animalia);Eumetazoa;Bilateria;Arthropoda;Crustacea;Maxillopoda;Copepoda;Cyclopoida;	0	0	0	0.0023	0	0	0	0	0	0	0.0007
Eukaryota;Opisthokonta;Holozoa;Metazoa (Animalia);Eumetazoa;Bilateria;Arthropoda;Hexapoda;Insecta;Pterygota;Neoptera;Diptera;	0	0.0076	0	0	0	0	0	0	0	0	0
Eukaryota;Opisthokonta;Holozoa;Metazoa (Animalia);Eumetazoa;Bilateria;Bryozoa;Gymnolaemata;Ctenostomatida;	0	0	0	0	0.0009	0	0	0	0	0	0
Eukaryota;Opisthokonta;Holozoa;Metazoa (Animalia);Eumetazoa;Bilateria;Chordata;Tunicata;Appendicularia;Copelata;Oikopleuridae;	0	0.0011	0.0014	0.0035	0	0	0	0	0	0	0
Eukaryota;Opisthokonta;Holozoa;Metazoa (Animalia);Eumetazoa;Bilateria;uncultured;	0	0	0	0	0.0044	0.0049	0	0	0.0026	0	0
Eukaryota;Opisthokonta;Holozoa;Metazoa (Animalia);Eumetazoa;Cnidaria;Hydrozoa;Trachylinae;Trachymedusae;	0	0.0022	0	0	0	0	0	0	0	0	0
Eukaryota;Opisthokonta;Holozoa;Metazoa (Animalia);Eumetazoa;Ctenophora;Tentaculata;Cydippida;	0	0	0	0	0	0.0109	0	0	0.0103	0	0
Eukaryota;Opisthokonta;Holozoa;Metazoa (Animalia);Eumetazoa;Ctenophora;Tentaculata;Lobata;	0	0	0	0.0012	0	0	0	0	0	0	0.0007
Eukaryota;Opisthokonta;Holozoa;Metazoa (Animalia);Porifera;Demospongiae;Axinellida;	0	0	0	0	0	0	0	0	0	0	0.0007
Eukaryota;Opisthokonta;Nucletmycea;Fungi;Chytridiomycota;Incertae Sedis;Chytridiomycetes;	0	0	0	0	0	0	0.001	0	0	0	0
Eukaryota;Opisthokonta;Nucletmycea;Fungi;Chytridiomycota;Incertae Sedis;Chytridiomycetes;Lobulomycetales;Lobulomycetaceae;uncultured;	0.0074	0	0	0	0	0.0012	0	0	0	0	0
Eukaryota;Opisthokonta;Nucletmycea;Fungi;Chytridiomycota;Incertae Sedis;Chytridiomycetes;Rhizophydiales;Incertae Sedis;Batrachochytrium;	0	0	0	0	0	0.0024	0	0	0	0	0
Eukaryota;Opisthokonta;Nucletmycea;Fungi;Dikarya;Ascomycota;Pezizomycotina;Eurotiomycetes;Eurotiales;Aspergillaceae;Aspergillus;	0	0.0011	0	0	0	0	0	0	0	0	0
Eukaryota;Opisthokonta;Nucletmycea;Fungi;Dikarya;Ascomycota;Pezizomycotina;Sordariomycetes;Glomerellales;Plectosphaerellaceae;Gibellulopsis;	0.0025	0.0011	0.0028	0.0012	0	0	0	0	0	0	0
Eukaryota;Opisthokonta;Nucletmycea;Fungi;Dikarya;Ascomycota;Pezizomycotina;Sordariomycetes;Glomerellales;Plectosphaerellaceae;Verticillium;	0	0.0022	0.0014	0	0	0	0	0	0	0	0
Eukaryota;Picozoa;	0.0074	0.0054	0.0083	0.0219	0.0079	0.0085	0.0186	0.0051	0.0233	0.0213	0.0146
Eukaryota;Picozoa;Picomonadida;	0.0087	0.0087	0.0139	0.0277	0.0026	0.0061	0.0248	0.0034	0.075	0.0277	0.0132
Eukaryota;Picozoa;Picomonadida;Picomonadidae;Picomonas;	0	0.0011	0	0.0023	0.0009	0	0.001	0	0.0129	0.0007	0.0059
Eukaryota;SAR;Alveolata;	0	0	0	0	0	0	0	0	0	0	0.0007
Eukaryota;SAR;Alveolata;Ciliophora;	0	0	0	0	0	0	0	0.0034	0	0	0.0007
Eukaryota;SAR;Alveolata;Ciliophora;Intramacronucleata;Conthreep;Nassophorea;uncultured;	0.0025	0.0022	0.0056	0.0046	0.0132	0.0243	0.0021	0.0043	0.0026	0.0092	0.0029
Eukaryota;SAR;Alveolata;Ciliophora;Intramacronucleata;Conthreep;Oligohymenophorea;Apostomatia;Pseudocollinia;	0	0	0	0	0	0	0.0021	0	0	0	0
Eukaryota;SAR;Alveolata;Ciliophora;Intramacronucleata;Conthreep;Oligohymenophorea;Scuticociliatia;	0	0	0.0014	0.0023	0	0	0	0	0.0013	0	0.0015
Eukaryota;SAR;Alveolata;Ciliophora;Intramacronucleata;Conthreep;Oligohymenophorea;Scuticociliatia;Porpostoma;	0	0	0	0	0	0	0	0	0	0	0.0007
Eukaryota;SAR;Alveolata;Ciliophora;Intramacronucleata;Conthreep;Oligohymenophorea;Scuticociliatia;uncultured;	0	0	0	0	0.007	0.0073	0.0062	0.0009	0.0026	0.0014	0.0007
Eukaryota;SAR;Alveolata;Ciliophora;Intramacronucleata;Conthreep;Phyllopharyngea;Cyrtophoria;Pithites;	0	0.0011	0	0.0069	0.0053	0	0.0021	0.0017	0.0039	0	0.0029
Eukaryota;SAR;Alveolata;Ciliophora;Intramacronucleata;Conthreep;Prostomatea;Cryptocaryon;	0.0173	0	0.0014	0	0.0159	0.0862	0	0.0009	0.0026	0.0993	0.0044
Eukaryota;SAR;Alveolata;Ciliophora;Intramacronucleata;Litostomatea;Haptoria;	0.0025	0.0011	0.0014	0.0012	0.0035	0.0049	0.0031	0.0017	0	0	0
Eukaryota;SAR;Alveolata;Ciliophora;Intramacronucleata;Litostomatea;Haptoria;Amphileptus;	0	0	0	0	0	0	0	0	0.0013	0	0
Eukaryota;SAR;Alveolata;Ciliophora;Intramacronucleata;Litostomatea;Haptoria;Apobryophyllum;	0	0	0	0	0.0009	0.0012	0	0.0009	0	0	0
Eukaryota;SAR;Alveolata;Ciliophora;Intramacronucleata;Litostomatea;Haptoria;Didinium;	0	0	0	0.0012	0.0035	0.0316	0	0.0068	0.0026	0.0043	0.0007
Eukaryota;SAR;Alveolata;Ciliophora;Intramacronucleata;Litostomatea;Haptoria;Dimacrocaryon;	0	0	0	0	0	0.0012	0	0.0017	0	0	0
Eukaryota;SAR;Alveolata;Ciliophora;Intramacronucleata;Litostomatea;Haptoria;Litonotus;	0	0	0	0	0	0.0012	0.001	0.0009	0	0	0
Eukaryota;SAR;Alveolata;Ciliophora;Intramacronucleata;Litostomatea;Haptoria;Loxophyllum;	0.0074	0	0.0028	0	0.0018	0.017	0.001	0.0034	0	0	0
Eukaryota;SAR;Alveolata;Ciliophora;Intramacronucleata;Litostomatea;Mesodiniidae;FV18-2A2;	0.0025	0	0	0	0	0.0121	0	0.0043	0	0.0014	0.0015
Eukaryota;SAR;Alveolata;Ciliophora;Intramacronucleata;Litostomatea;Mesodiniidae;Myrionecta;	0.0322	0	0	0	0.0044	0.0704	0	0.0205	0	0.0156	0.0066
Eukaryota;SAR;Alveolata;Ciliophora;Intramacronucleata;Spirotrichea;Choreotrichia;	0	0	0	0.0012	0.0018	0.0012	0	0.0009	0.0039	0.0014	0
Eukaryota;SAR;Alveolata;Ciliophora;Intramacronucleata;Spirotrichea;Choreotrichia;Amphorellopsis;	0	0	0	0	0	0	0	0	0	0	0.0007
Eukaryota;SAR;Alveolata;Ciliophora;Intramacronucleata;Spirotrichea;Choreotrichia;Codonellopsis;	0	0.0022	0	0	0	0.0024	0.001	0.0009	0	0.0007	0.0022
Eukaryota;SAR;Alveolata;Ciliophora;Intramacronucleata;Spirotrichea;Choreotrichia;Pelagostrobilidium;	0	0.0174	0.0028	0.0035	0	0.0073	0.0052	0.0017	0.0233	0	0.0205
Eukaryota;SAR;Alveolata;Ciliophora;Intramacronucleata;Spirotrichea;Choreotrichia;Ptychocylis;	0.0012	0	0	0	0	0	0.0021	0.0009	0.0026	0	0
Eukaryota;SAR;Alveolata;Ciliophora;Intramacronucleata;Spirotrichea;Choreotrichia;Rimostrombidium;	0	0	0.0014	0.0046	0	0.0364	0	0.0051	0.0026	0.0057	0.0044
Eukaryota;SAR;Alveolata;Ciliophora;Intramacronucleata;Spirotrichea;Choreotrichia;Salpingella;	0	0	0	0	0	0	0	0	0	0	0.0007
Eukaryota;SAR;Alveolata;Ciliophora;Intramacronucleata;Spirotrichea;Choreotrichia;Strombidinopsis;	0	0	0	0.0023	0	0	0	0	0	0.0014	0.0007
Eukaryota;SAR;Alveolata;Ciliophora;Intramacronucleata;Spirotrichea;Choreotrichia;Tintinnidium;	0	0.0043	0	0.0012	0.0026	0.0024	0	0.0009	0.0026	0	0.0022
Eukaryota;SAR;Alveolata;Ciliophora;Intramacronucleata;Spirotrichea;Choreotrichia;Tintinnopsis;	0	0	0	0	0.0018	0	0	0	0	0	0
Eukaryota;SAR;Alveolata;Ciliophora;Intramacronucleata;Spirotrichea;Choreotrichia;uncultured;	0.0025	0.0054	0.0236	0.0115	0.0123	0.0668	0.0268	0.012	0.0026	0.0376	0.0198
Eukaryota;SAR;Alveolata;Ciliophora;Intramacronucleata;Spirotrichea;Hypotrichia;	0	0	0	0	0	0	0	0	0	0.0007	0
Eukaryota;SAR;Alveolata;Ciliophora;Intramacronucleata;Spirotrichea;Hypotrichia;Hemiurosomoida;	0	0	0	0	0	0	0	0	0	0.0007	0
Eukaryota;SAR;Alveolata;Ciliophora;Intramacronucleata;Spirotrichea;Hypotrichia;Holosticha;	0.0012	0.0011	0	0	0	0	0.001	0.0017	0.0013	0.0021	0.0051
Eukaryota;SAR;Alveolata;Ciliophora;Intramacronucleata;Spirotrichea;Hypotrichia;Monocoronella;	0	0	0	0.0023	0	0	0	0	0	0	0
Eukaryota;SAR;Alveolata;Ciliophora;Intramacronucleata;Spirotrichea;Hypotrichia;Strongylidium;	0	0	0	0	0	0.0024	0	0	0	0	0
Eukaryota;SAR;Alveolata;Ciliophora;Intramacronucleata;Spirotrichea;Oligotrichia;	0.005	0	0	0	0.007	0.0474	0	0.0077	0.0026	0.0014	0.0029
Eukaryota;SAR;Alveolata;Ciliophora;Intramacronucleata;Spirotrichea;Oligotrichia;Apostrombidium;	0	0	0	0	0	0.0024	0	0	0	0	0
Eukaryota;SAR;Alveolata;Ciliophora;Intramacronucleata;Spirotrichea;Oligotrichia;Parallelostrombidium;	0	0	0.0014	0	0	0	0	0	0	0.0007	0
Eukaryota;SAR;Alveolata;Ciliophora;Intramacronucleata;Spirotrichea;Oligotrichia;Pseudotontonia;	0.0012	0	0	0	0	0.0036	0	0.0026	0.0052	0.0071	0.0124
Eukaryota;SAR;Alveolata;Ciliophora;Intramacronucleata;Spirotrichea;Oligotrichia;Sinistrostrombidium;	0	0	0	0	0	0	0	0.0009	0	0	0
Eukaryota;SAR;Alveolata;Ciliophora;Intramacronucleata;Spirotrichea;Oligotrichia;Spirostrombidium;	0.0099	0	0	0.0012	0.0009	0.0012	0.001	0	0.0013	0.0007	0.0015
Eukaryota;SAR;Alveolata;Ciliophora;Intramacronucleata;Spirotrichea;Oligotrichia;Spirotontonia;	0.0025	0	0	0.0046	0.0026	0.0474	0.0021	0.0051	0.0091	0.0092	0.0432
Eukaryota;SAR;Alveolata;Ciliophora;Intramacronucleata;Spirotrichea;Oligotrichia;Strombidium;	0	0.0054	0	0.0023	0.0088	0.1008	0.0124	0.012	0.0065	0.0801	0.0205
Eukaryota;SAR;Alveolata;Ciliophora;Intramacronucleata;Spirotrichea;Oligotrichia;uncultured;	0.0223	0.0119	0.0083	0.0277	0.0625	0.2768	0.0495	0.0248	0.0142	0.0567	0.0454
Eukaryota;SAR;Alveolata;Ciliophora;Intramacronucleata;Spirotrichea;Oxytrichidae;	0	0	0	0	0	0.0012	0	0	0	0	0
Eukaryota;SAR;Alveolata;Ciliophora;Postciliodesmatophora;Heterotrichea;	0	0.0011	0	0	0	0	0	0	0	0	0
Eukaryota;SAR;Alveolata;Dinoflagellata;Dinophyceae;	0	0.0011	0.0014	0.0023	0	0	0	0	0.0013	0	0.0007
Eukaryota;SAR;Alveolata;Dinoflagellata;Dinophyceae;Dinophysiales;	0	0	0	0	0.0009	0	0	0	0	0	0
Eukaryota;SAR;Alveolata;Dinoflagellata;Dinophyceae;Dinophysiales;Dinophysis;	0	0	0	0	0	0	0.001	0	0	0	0
Eukaryota;SAR;Alveolata;Dinoflagellata;Dinophyceae;Dinophysiales;Sinophysis;	0.0025	0.0022	0	0	0	0.0024	0.001	0	0.0013	0	0.0022
Eukaryota;SAR;Alveolata;Dinoflagellata;Dinophyceae;Gymnodiniphycidae;Gymnodinium clade;Chytriodinium;	0	0.0011	0.0014	0.0173	0.0053	0	0	0	0.0013	0.0043	0.0088
Eukaryota;SAR;Alveolata;Dinoflagellata;Dinophyceae;Gymnodiniphycidae;Gymnodinium clade;Gymnodinium;	0.0037	0	0	0	0.0115	0.0073	0.0031	0.0034	0.0039	0.0028	0.0007
Eukaryota;SAR;Alveolata;Dinoflagellata;Dinophyceae;Gymnodiniphycidae;Gymnodinium clade;Gyrodiniellum;	0.0025	0	0.0042	0.0069	0.022	0.0376	0.0021	0.0214	0.0052	0.0106	0.0073
Eukaryota;SAR;Alveolata;Dinoflagellata;Dinophyceae;Gymnodiniphycidae;Gymnodinium clade;Lepidodinium;	0.0112	0.0022	0	0	0.0018	0	0	0.0086	0	0.0035	0.0029
Eukaryota;SAR;Alveolata;Dinoflagellata;Dinophyceae;Gymnodiniphycidae;Gymnodinium clade;Paragymnodinium;	0	0	0	0.0035	0	0	0.0021	0	0	0	0.0007
Eukaryota;SAR;Alveolata;Dinoflagellata;Dinophyceae;Gymnodiniphycidae;Gymnodinium clade;Polykrikos;	0	0	0	0	0	0.0024	0.001	0.0009	0	0	0
Eukaryota;SAR;Alveolata;Dinoflagellata;Dinophyceae;Gymnodiniphycidae;Gymnodinium clade;Proterythropsis;	0.0062	0.0011	0.0056	0.0081	0.0035	0.0049	0.0021	0.0034	0.0065	0.0007	0.0037
Eukaryota;SAR;Alveolata;Dinoflagellata;Dinophyceae;Gymnodiniphycidae;Gymnodinium clade;Woloszynskia;	0.0062	0.0022	0.0056	0.015	0.0123	0.0109	0.0124	0.006	0.0078	0.0035	0.0088
Eukaryota;SAR;Alveolata;Dinoflagellata;Dinophyceae;Gymnodiniphycidae;Gymnodinium clade;uncultured;	0.0025	0	0	0	0.0009	0	0	0.0009	0	0.0007	0.0007
Eukaryota;SAR;Alveolata;Dinoflagellata;Dinophyceae;Gymnodiniphycidae;Gyrodinium;	0.0582	0.0293	0.0264	0.0646	0.0335	0.0692	0.0186	0.0453	0.0349	0.083	0.0534
Eukaryota;SAR;Alveolata;Dinoflagellata;Dinophyceae;Gymnodiniphycidae;Incertae Sedis;Akashiwo;	0	0	0	0	0.0009	0.0073	0.0021	0.0026	0	0	0
Eukaryota;SAR;Alveolata;Dinoflagellata;Dinophyceae;Gymnodiniphycidae;Incertae Sedis;Cochlodinium;	0	0	0.0014	0	0	0	0.001	0	0	0	0.0007
Eukaryota;SAR;Alveolata;Dinoflagellata;Dinophyceae;Gymnodiniphycidae;Kareniaceae;	0	0	0.0028	0	0	0	0	0.0009	0	0	0.0007
Eukaryota;SAR;Alveolata;Dinoflagellata;Dinophyceae;Gymnodiniphycidae;Kareniaceae;Karenia;	0.0012	0	0	0	0	0	0	0.0009	0	0	0.0022
Eukaryota;SAR;Alveolata;Dinoflagellata;Dinophyceae;Gymnodiniphycidae;Kareniaceae;Karlodinium;	0.0694	0.0228	0.0737	0.0427	0.0449	0.0619	0.0629	0.0941	0.0827	0.0319	0.0359
Eukaryota;SAR;Alveolata;Dinoflagellata;Dinophyceae;Gymnodiniphycidae;Suessiaceae;Biecheleria;	0	0	0	0.0012	0	0	0	0	0	0	0.0007
Eukaryota;SAR;Alveolata;Dinoflagellata;Dinophyceae;Gymnodiniphycidae;Suessiaceae;Pelagodinium;	0	0	0	0.0035	0	0	0	0	0	0	0.0066
Eukaryota;SAR;Alveolata;Dinoflagellata;Dinophyceae;Gymnodiniphycidae;Suessiaceae;Polarella;	0	0	0	0	0.0018	0.0024	0.0103	0.012	0	0.0043	0.0044
Eukaryota;SAR;Alveolata;Dinoflagellata;Dinophyceae;Gymnodiniphycidae;Suessiaceae;Symbiodinium;	0	0	0	0.0023	0	0	0.001	0	0	0	0
Eukaryota;SAR;Alveolata;Dinoflagellata;Dinophyceae;Gymnodiniphycidae;Suessiaceae;uncultured;	0	0	0	0	0	0	0	0	0	0.0014	0
Eukaryota;SAR;Alveolata;Dinoflagellata;Dinophyceae;Gymnodiniphycidae;uncultured;	0.005	0.0087	0	0.0208	0.0132	0	0.0031	0.0111	0.0194	0.0035	0.0198
Eukaryota;SAR;Alveolata;Dinoflagellata;Dinophyceae;Peridiniphycidae;Gonyaulacales;Azadinium;	0.0235	0.0119	0.0348	0.0265	0.0211	0.0425	0.0175	0.0308	0.0272	0.0277	0.0271
Eukaryota;SAR;Alveolata;Dinoflagellata;Dinophyceae;Peridiniphycidae;Gonyaulacales;Heterodinium;	0.005	0	0	0.0012	0	0.0024	0.0031	0.0086	0.0052	0	0
Eukaryota;SAR;Alveolata;Dinoflagellata;Dinophyceae;Peridiniphycidae;Peridiniales;Heterocapsa;	0.0037	0.0011	0	0.0069	0	0.0049	0	0.0051	0.0026	0.0028	0.0044
Eukaryota;SAR;Alveolata;Dinoflagellata;Dinophyceae;Peridiniphycidae;Peridiniales;Islandinium;	0	0	0	0.0012	0.0009	0	0	0	0	0	0
Eukaryota;SAR;Alveolata;Dinoflagellata;Dinophyceae;Peridiniphycidae;Peridiniales;Peridinium;	0	0	0	0	0.0035	0.0036	0.0021	0.0086	0.0026	0.0007	0.0007
Eukaryota;SAR;Alveolata;Dinoflagellata;Dinophyceae;Peridiniphycidae;Peridiniales;Protoperidinium;	0	0	0	0	0	0.0012	0	0	0	0	0.0007
Eukaryota;SAR;Alveolata;Dinoflagellata;Dinophyceae;Peridiniphycidae;Peridiniales;uncultured;	0	0	0.0056	0.0012	0.0018	0.0012	0.0031	0	0	0.0014	0
Eukaryota;SAR;Alveolata;Dinoflagellata;Dinophyceae;Peridiniphycidae;Podolampadaceae;Roscoffia;	0.0012	0	0	0.0012	0	0	0	0	0.0052	0	0.0007
Eukaryota;SAR;Alveolata;Dinoflagellata;Dinophyceae;Peridiniphycidae;Thoracosphaeraceae;	0.0099	0.0022	0.0014	0	0	0.0049	0.0021	0.0026	0	0	0.0029
Eukaryota;SAR;Alveolata;Dinoflagellata;Dinophyceae;Peridiniphycidae;Thoracosphaeraceae;Pentapharsodinium;	0	0	0	0.0035	0.0097	0	0	0	0	0	0
Eukaryota;SAR;Alveolata;Dinoflagellata;Dinophyceae;Prorocentrales;Prorocentrum;	0.0037	0.0022	0.0111	0.0012	0.0026	0.0194	0.0052	0.0239	0.0078	0.0028	0.0029
Eukaryota;SAR;Alveolata;Dinoflagellata;Dinophyceae;uncultured;	0.0285	0.0022	0.0292	0.0219	0.0282	0.0328	0.0155	0.0239	0.0453	0.0128	0.0139
Eukaryota;SAR;Alveolata;Dinoflagellata;Incertae Sedis;	0.0012	0	0.0014	0	0.0062	0.0073	0	0.0051	0.0013	0.0021	0.0022
Eukaryota;SAR;Alveolata;Dinoflagellata;Incertae Sedis;Blastodinium;	0.0037	0.0119	0.0139	0.0334	0.0203	0.0146	0.0052	0.0239	0.0168	0.0035	0.0183
Eukaryota;SAR;Alveolata;Dinoflagellata;Noctilucales;Noctiluca;	0.0211	0	0.0042	0	0.0026	0.0024	0	0	0	0.0057	0.008
Eukaryota;SAR;Alveolata;Dinoflagellata;uncultured;	0	0	0	0.0023	0	0.0024	0.001	0	0	0	0.0007
Eukaryota;SAR;Alveolata;Protalveolata;Colpodellida;Colpodella;	0	0	0	0	0	0	0	0	0	0.0007	0
Eukaryota;SAR;Alveolata;Protalveolata;Incertae Sedis;Ellobiopsidae;Ellobiopsis;	0	0	0	0.0012	0	0	0	0	0	0	0
Eukaryota;SAR;Alveolata;Protalveolata;Incertae Sedis;Ellobiopsidae;Thalassomyces;	0	0	0	0	0	0	0	0	0	0.0014	0
Eukaryota;SAR;Alveolata;Protalveolata;Perkinsidae;A31;	0	0	0	0	0	0	0	0.0009	0	0	0
Eukaryota;SAR;Alveolata;Protalveolata;Syndiniales;	0.0099	0.0022	0.0028	0.0012	0.0018	0.0146	0.0031	0.0145	0.0039	0.0021	0.0007
Eukaryota;SAR;Alveolata;Protalveolata;Syndiniales;Amoebophrya;	0.1016	0.0033	0.0876	0.1684	0.0731	0.0886	0.1413	0.0257	0.0478	0.0199	0.1083
Eukaryota;SAR;Alveolata;Protalveolata;Syndiniales;Duboscquella;	0	0	0	0	0	0	0.0031	0	0	0	0
Eukaryota;SAR;Alveolata;Protalveolata;Syndiniales;Hematodinium;	0	0	0	0.0012	0	0	0	0	0	0	0
Eukaryota;SAR;Alveolata;Protalveolata;Syndiniales;Syndiniales Group I;	0.14	0.0402	0.1252	0.1303	0.0881	0.1712	0.2754	0.0984	0.0957	0.0816	0.0702
Eukaryota;SAR;Alveolata;Protalveolata;Syndiniales;Syndiniales Group II;	0.1388	0.0282	0.1572	0.301	0.1515	0.1081	0.2032	0.0368	0.181	0.0269	0.1837
Eukaryota;SAR;Alveolata;Protalveolata;Syndiniales;Syndiniales Group III;	0.0248	0.0011	0.0056	0.0208	0.0123	0.0219	0.0196	0.012	0.0026	0.0078	0.0029
Eukaryota;SAR;Alveolata;Protalveolata;Syndiniales;Syndiniales Group V;	0	0	0	0	0.0018	0.0061	0	0	0	0.0007	0
Eukaryota;SAR;Alveolata;Protalveolata;Syndiniales;uncultured;	0	0	0.0014	0	0.0009	0.0049	0	0	0.0013	0	0.0007
Eukaryota;SAR;Alveolata;uncultured;	0.0768	0.0076	0.0487	0.06	0.0423	0.0716	0.034	0.0616	0.0763	0.0447	0.0241
Eukaryota;SAR;Rhizaria;Cercozoa;	0.0012	0	0	0	0	0	0	0	0.0013	0	0
Eukaryota;SAR;Rhizaria;Cercozoa;Cercomonadidae;Cercomonas;	0	0	0	0	0	0.0012	0	0	0	0	0.0007
Eukaryota;SAR;Rhizaria;Cercozoa;Cercomonadidae;uncultured;	0	0	0	0	0.0009	0	0	0	0	0	0.0007
Eukaryota;SAR;Rhizaria;Cercozoa;Chlorarachniophyta;NOR26;	0	0.0011	0	0.0046	0	0	0.001	0.0034	0.0026	0.017	0.011
Eukaryota;SAR;Rhizaria;Cercozoa;Glissomonadida;	0	0	0	0	0	0	0.001	0	0	0	0
Eukaryota;SAR;Rhizaria;Cercozoa;Imbricatea;Marimonadida;NAMAKO-15;	0	0	0	0	0	0	0.0031	0	0	0	0
Eukaryota;SAR;Rhizaria;Cercozoa;Imbricatea;Nudifila;	0	0	0	0	0	0	0	0	0.0013	0	0
Eukaryota;SAR;Rhizaria;Cercozoa;Imbricatea;Silicofilosea;Thaumatomonadida;Thaumatomonadidae;uncultured;	0	0	0	0	0.0009	0	0	0	0	0	0
Eukaryota;SAR;Rhizaria;Cercozoa;Metromonadea;Micrometopion;	0.0012	0	0	0	0	0	0	0	0	0	0
Eukaryota;SAR;Rhizaria;Cercozoa;Novel Clade 2;	0.0136	0	0.0097	0	0	0	0.0021	0	0.0013	0.0099	0
Eukaryota;SAR;Rhizaria;Cercozoa;Thecofilosea;	0.0012	0.0022	0	0.0035	0	0.0036	0	0.0009	0	0.0007	0.0007
Eukaryota;SAR;Rhizaria;Cercozoa;Thecofilosea;Cryomonadida;Protaspidae;Cryothecomonas;	0.0074	0.0098	0.0028	0.0023	0	0.0073	0	0	0	0.0071	0.0029
Eukaryota;SAR;Rhizaria;Cercozoa;Thecofilosea;Cryomonadida;Protaspidae;Protaspis;	0.0025	0	0	0	0	0.0024	0.001	0	0.0013	0	0.0007
Eukaryota;SAR;Rhizaria;Cercozoa;Thecofilosea;Cryomonadida;Rhizaspididae;Rhogostoma;	0.0012	0	0	0	0	0.0036	0	0	0	0.0014	0
Eukaryota;SAR;Rhizaria;Cercozoa;Thecofilosea;Ebriacea;Ebria;	0	0	0	0	0	0	0	0	0.0013	0	0
Eukaryota;SAR;Rhizaria;Cercozoa;Thecofilosea;uncultured;	0.005	0	0	0.0023	0	0.0109	0	0	0	0.0007	0
Eukaryota;SAR;Rhizaria;Cercozoa;uncultured;	0.0012	0	0.0014	0	0.0009	0.0012	0	0	0	0	0.0007
Eukaryota;SAR;Rhizaria;Retaria;Acantharia;Acantharea Group I;	0.0025	0	0	0.0012	0	0.0024	0	0	0	0	0.0022
Eukaryota;SAR;Rhizaria;Retaria;Acantharia;Chaunocanthida;	0	0	0.0014	0	0	0.0024	0	0.0026	0	0	0.0007
Eukaryota;SAR;Rhizaria;Retaria;Polycystinea;Nassellaria;	0	0	0	0	0.0044	0	0	0	0	0	0
Eukaryota;SAR;Rhizaria;Retaria;Polycystinea;Nassellaria;Pseudocubus;	0	0.0022	0.0028	0	0.0097	0.0012	0.0072	0	0	0	0
Eukaryota;SAR;Rhizaria;Retaria;Polycystinea;Spumellaria;uncultured;	0.0025	0	0.0028	0.0012	0	0	0.0031	0	0.0013	0	0
Eukaryota;SAR;Rhizaria;Retaria;RAD A;	0.0124	0.0109	0.0083	0	0.0123	0.0158	0.0134	0.0171	0.0065	0.0028	0
Eukaryota;SAR;Rhizaria;Retaria;RAD B;	0.0012	0	0.0056	0	0.0035	0.0024	0.0083	0	0	0.0007	0
Eukaryota;SAR;Rhizaria;Retaria;RAD C;	0	0	0	0	0	0.0012	0	0	0	0	0
Eukaryota;SAR;Stramenopiles;Bicosoecida;Bicosoeca;	0.0012	0.0022	0	0	0	0	0	0	0	0	0
Eukaryota;SAR;Stramenopiles;Bicosoecida;uncultured;	0	0	0.0028	0.0115	0	0	0	0	0	0	0.0073
Eukaryota;SAR;Stramenopiles;Incertae Sedis;Pirsonia;	0.0037	0	0	0	0	0	0	0	0	0	0
Eukaryota;SAR;Stramenopiles;Labyrinthulomycetes;	0.0025	0	0	0	0.0009	0	0.001	0	0.0013	0	0.0007
Eukaryota;SAR;Stramenopiles;Labyrinthulomycetes;Sorodiplophrys;	0	0	0	0	0.0009	0	0	0.0009	0	0	0
Eukaryota;SAR;Stramenopiles;Labyrinthulomycetes;Thraustochytriaceae;Aplanochytrium;	0	0	0	0	0	0	0.0021	0	0.0013	0	0
Eukaryota;SAR;Stramenopiles;Labyrinthulomycetes;Thraustochytriaceae;Labyrinthuloides;	0	0	0	0.0012	0	0	0	0	0	0	0.0007
Eukaryota;SAR;Stramenopiles;Labyrinthulomycetes;Thraustochytriaceae;Oblongichytrium;	0	0.0011	0	0	0	0	0.0031	0	0	0	0
Eukaryota;SAR;Stramenopiles;Labyrinthulomycetes;uncultured;	0.0248	0.0054	0.0083	0.0046	0.0026	0.0024	0.0309	0.006	0.0103	0.0071	0.0051
Eukaryota;SAR;Stramenopiles;MAST-1;	0.0297	0.0065	0.0236	0.0115	0.0159	0.0413	0.0196	0.0171	0.0168	0.0099	0.0029
Eukaryota;SAR;Stramenopiles;MAST-1;MAST-1A;	0.0124	0.0087	0.0125	0	0.0229	0.0413	0.0361	0.0197	0.0091	0.0064	0.0015
Eukaryota;SAR;Stramenopiles;MAST-1;MAST-1B;	0.0149	0.0043	0.0125	0.0265	0.0062	0.0219	0.0144	0.0154	0.0065	0.0007	0.011
Eukaryota;SAR;Stramenopiles;MAST-1;MAST-1C;	0.0669	0.0228	0.025	0.0288	0.0502	0.0656	0.0495	0.0522	0.0362	0.0191	0.0205
Eukaryota;SAR;Stramenopiles;MAST-1;MAST-1D;	0.0012	0	0.0014	0.0046	0.0018	0.0061	0.001	0.0026	0	0.0028	0
Eukaryota;SAR;Stramenopiles;MAST-22;	0	0	0	0.0012	0	0	0	0	0	0	0
Eukaryota;SAR;Stramenopiles;MAST-23;	0	0	0	0.0012	0.0035	0.0012	0	0	0	0	0.0007
Eukaryota;SAR;Stramenopiles;MAST-24;	0	0	0	0	0	0	0	0	0.0013	0	0
Eukaryota;SAR;Stramenopiles;MAST-2;	0.0074	0.0022	0.0056	0.0058	0.0044	0.0158	0.0031	0.0137	0	0.0099	0.0029
Eukaryota;SAR;Stramenopiles;MAST-3;	0	0	0	0.0012	0	0	0	0	0	0	0
Eukaryota;SAR;Stramenopiles;MAST-3;MAST-3B;	0.0136	0	0.0056	0.0023	0.007	0.0073	0.0206	0.0077	0.0233	0.0021	0.0044
Eukaryota;SAR;Stramenopiles;MAST-3;MAST-3D;	0	0	0.0014	0.0012	0.0009	0.0012	0.0021	0	0.0026	0	0.0007
Eukaryota;SAR;Stramenopiles;MAST-3;MAST-3E;	0.0025	0	0	0.0023	0.0026	0.0012	0	0	0.0013	0.0021	0.0102
Eukaryota;SAR;Stramenopiles;MAST-3;MAST-3F;	0.0112	0.0033	0	0.015	0.0009	0	0.0031	0	0.0052	0.0021	0.0007
Eukaryota;SAR;Stramenopiles;MAST-3;MAST-3G;	0.0037	0.0022	0	0.0012	0.0018	0	0	0	0.022	0	0.0029
Eukaryota;SAR;Stramenopiles;MAST-3;MAST-3I;	0.0037	0.0043	0.0042	0.0081	0.0035	0.0024	0.0031	0	0.0142	0.0043	0.0029
Eukaryota;SAR;Stramenopiles;MAST-3;MAST-3L;	0.0062	0.0228	0.0083	0.03	0.0009	0.0012	0.0103	0	0.1978	0.022	0.0417
Eukaryota;SAR;Stramenopiles;MAST-4;	0	0.0054	0	0.0127	0.0009	0	0.001	0	0.0116	0	0.0117
Eukaryota;SAR;Stramenopiles;MAST-4;MAST-4D;	0	0	0	0.0023	0	0	0	0	0	0	0.0015
Eukaryota;SAR;Stramenopiles;MAST-4;MAST-4F;	0	0	0	0.0012	0	0	0	0	0	0	0
Eukaryota;SAR;Stramenopiles;MAST-7;	0.0099	0.0033	0.0056	0.0035	0.0009	0.0036	0.0031	0	0.0065	0.0035	0
Eukaryota;SAR;Stramenopiles;MAST-7;MAST-7A;	0.031	0.013	0.0153	0.015	0.0211	0.0219	0.0237	0.0111	0.0336	0.0943	0.0102
Eukaryota;SAR;Stramenopiles;MAST-7;MAST-7B;	0.0062	0	0.0014	0.0092	0.0044	0.0073	0.0041	0.0017	0.0039	0.0199	0.0029
Eukaryota;SAR;Stramenopiles;MAST-8;	0.0112	0.0033	0.0042	0.0127	0.0026	0.0073	0.0062	0.0017	0.0116	0.0043	0.0066
Eukaryota;SAR;Stramenopiles;MAST-8;MAST-8D;	0.0012	0.0022	0.0056	0.0023	0.0026	0.0036	0.0021	0	0.0026	0.0007	0.0044
Eukaryota;SAR;Stramenopiles;MAST-9;	0.0012	0	0.0042	0	0	0	0.001	0	0	0	0.0015
Eukaryota;SAR;Stramenopiles;MAST-9;MAST-9A;	0	0.0011	0	0	0	0	0	0	0	0	0
Eukaryota;SAR;Stramenopiles;MAST-9;MAST-9D;	0	0	0.0028	0	0	0	0.0021	0.0017	0	0	0
Eukaryota;SAR;Stramenopiles;Ochrophyta;ANT37-16;	0.0012	0.0043	0.0014	0.0069	0.0026	0.0049	0.0031	0.0009	0.0052	0.0106	0.0183
Eukaryota;SAR;Stramenopiles;Ochrophyta;Bolidomonas;	0.005	0	0.007	0.0277	0.0018	0.0036	0.0041	0.0034	0.0052	0.0128	0.0519
Eukaryota;SAR;Stramenopiles;Ochrophyta;Chrysophyceae;Chromulinales;	0	0.0033	0	0.0012	0	0	0	0	0	0	0.0015
Eukaryota;SAR;Stramenopiles;Ochrophyta;Chrysophyceae;Chromulinales;Chrysoxys;	0	0	0	0	0	0	0	0	0	0.0071	0.0029
Eukaryota;SAR;Stramenopiles;Ochrophyta;Chrysophyceae;Chromulinales;Pedospumella;	0	0.0011	0.0042	0	0.0009	0	0	0	0.0013	0.0057	0
Eukaryota;SAR;Stramenopiles;Ochrophyta;Chrysophyceae;Chromulinales;Poterioochromonas;	0	0	0.0014	0	0	0	0	0	0	0	0
Eukaryota;SAR;Stramenopiles;Ochrophyta;Chrysophyceae;Ochromonadales;Epipyxis;	0	0.0022	0	0	0	0	0	0	0	0	0
Eukaryota;SAR;Stramenopiles;Ochrophyta;Chrysophyceae;Ochromonadales;Paraphysomonas;	0.0012	0	0.0042	0.0046	0.0018	0.0012	0	0.0009	0.0026	0.0035	0.0007
Eukaryota;SAR;Stramenopiles;Ochrophyta;Chrysophyceae;Ochromonadales;uncultured;	0	0.0022	0.0014	0	0	0.0024	0	0	0	0.0191	0
Eukaryota;SAR;Stramenopiles;Ochrophyta;Chrysophyceae;uncultured;	0.0062	0.0043	0.007	0.0727	0.0062	0.0109	0.0021	0.0009	0.0013	0.0092	0.0461
Eukaryota;SAR;Stramenopiles;Ochrophyta;Diatomea;Bacillariophytina;Bacillariophyceae;	0	0	0	0	0	0	0.001	0	0	0	0.0022
Eukaryota;SAR;Stramenopiles;Ochrophyta;Diatomea;Bacillariophytina;Bacillariophyceae;Cylindrotheca;	0	0	0	0	0	0	0.0021	0	0	0.0021	0.0015
Eukaryota;SAR;Stramenopiles;Ochrophyta;Diatomea;Bacillariophytina;Bacillariophyceae;Fragilariopsis;	0.0074	0	0	0.0023	0.0053	0.0036	0	0	0	0.0007	0.0007
Eukaryota;SAR;Stramenopiles;Ochrophyta;Diatomea;Bacillariophytina;Bacillariophyceae;Pleurosigma;	0	0	0	0	0	0	0	0.0009	0	0	0
Eukaryota;SAR;Stramenopiles;Ochrophyta;Diatomea;Bacillariophytina;Bacillariophyceae;Pseudo-nitzschia;	0.0025	0	0.0028	0.0023	0.0053	0.0097	0.0041	0.0009	0	0.005	0.0073
Eukaryota;SAR;Stramenopiles;Ochrophyta;Diatomea;Bacillariophytina;Bacillariophyceae;Rhaphoneis;	0	0	0	0	0	0	0	0	0	0	0.0037
Eukaryota;SAR;Stramenopiles;Ochrophyta;Diatomea;Bacillariophytina;Mediophyceae;Arcocellulus;	0	0	0.0014	0.0035	0	0	0	0	0.0052	0	0.0044
Eukaryota;SAR;Stramenopiles;Ochrophyta;Diatomea;Bacillariophytina;Mediophyceae;Attheya;	0	0	0	0	0	0.0012	0	0	0	0	0
Eukaryota;SAR;Stramenopiles;Ochrophyta;Diatomea;Bacillariophytina;Mediophyceae;Cerataulina;	0.0012	0	0	0	0	0	0	0	0	0	0
Eukaryota;SAR;Stramenopiles;Ochrophyta;Diatomea;Bacillariophytina;Mediophyceae;Chaetoceros;	0.171	0.0022	0.0014	0.0058	0	0.2793	0.0134	0	0.0246	0.0028	0.0183
Eukaryota;SAR;Stramenopiles;Ochrophyta;Diatomea;Bacillariophytina;Mediophyceae;Skeletonema;	0	0	0	0.0012	0	0	0	0	0	0	0
Eukaryota;SAR;Stramenopiles;Ochrophyta;Diatomea;Bacillariophytina;Mediophyceae;Thalassiosira;	0.0037	0	0	0.0069	0.0009	0.0036	0	0.0009	0	0	0.0015
Eukaryota;SAR;Stramenopiles;Ochrophyta;Diatomea;Bacillariophytina;Mediophyceae;uncultured;	0	0	0.0014	0	0.0018	0.0073	0.0021	0.0009	0.0078	0.0014	0.0007
Eukaryota;SAR;Stramenopiles;Ochrophyta;Diatomea;Coscinodiscophytina;	0	0	0	0.0012	0	0	0	0	0.0013	0	0
Eukaryota;SAR;Stramenopiles;Ochrophyta;Diatomea;Coscinodiscophytina;Fragilariales;Synedra;	0	0	0	0	0	0	0	0	0	0.0014	0
Eukaryota;SAR;Stramenopiles;Ochrophyta;Diatomea;Coscinodiscophytina;Rhizosolenids;Proboscia;	0	0	0	0	0	0	0	0	0	0	0.0007
Eukaryota;SAR;Stramenopiles;Ochrophyta;Diatomea;Coscinodiscophytina;Rhizosolenids;Rhizosolenia;	0	0	0.0014	0	0	0	0.001	0	0	0	0
Eukaryota;SAR;Stramenopiles;Ochrophyta;Diatomea;ME-Euk-FW10;	0.005	0	0.0042	0.0012	0.0026	0.0012	0.001	0.0009	0	0	0
Eukaryota;SAR;Stramenopiles;Ochrophyta;Dictyochophyceae;Dictyochales;Dictyocha;	0.005	0.0011	0.007	0.0081	0	0.0097	0	0.006	0.0078	0.0021	0.0044
Eukaryota;SAR;Stramenopiles;Ochrophyta;Dictyochophyceae;Dictyochales;Florenciella;	0.0223	0.0065	0.0139	0.0046	0.0335	0.0219	0.0227	0.0163	0.0297	0.0106	0.0095
Eukaryota;SAR;Stramenopiles;Ochrophyta;Dictyochophyceae;Florenciellales;Pseudochattonella;	0	0	0	0.0012	0	0	0	0	0.0013	0	0.0007
Eukaryota;SAR;Stramenopiles;Ochrophyta;Dictyochophyceae;Pedinellales;	0	0.0109	0	0.0069	0.0053	0.0073	0	0.0086	0.0065	0.0064	0.0315
Eukaryota;SAR;Stramenopiles;Ochrophyta;Dictyochophyceae;Pedinellales;FV36-2G08;	0	0.0011	0	0	0	0	0	0	0	0.0007	0
Eukaryota;SAR;Stramenopiles;Ochrophyta;Dictyochophyceae;Pedinellales;Pedinella;	0	0.0022	0.0014	0	0	0	0	0.0017	0	0.0014	0.0022
Eukaryota;SAR;Stramenopiles;Ochrophyta;Dictyochophyceae;Pedinellales;Pseudopedinella;	0	0	0	0.0023	0	0	0	0	0	0	0
Eukaryota;SAR;Stramenopiles;Ochrophyta;Eustigmatophyceae;Eustigmatales;uncultured;	0.0025	0	0	0.0023	0.0035	0	0.001	0.0017	0	0	0
Eukaryota;SAR;Stramenopiles;Ochrophyta;MOCH-2;	0.0112	0.0011	0	0	0.0018	0.0121	0	0.0034	0	0	0.0044
Eukaryota;SAR;Stramenopiles;Ochrophyta;Pelagophyceae;Pelagomonadales;Aureococcus;	0.0149	0	0.0417	0.0023	0.0088	0.0036	0.0423	0.0137	0.0039	0.0078	0.008
Eukaryota;SAR;Stramenopiles;Ochrophyta;Pelagophyceae;Pelagomonadales;Pelagomonas;	0	0	0.0014	0	0.0009	0	0	0	0	0	0
Eukaryota;SAR;Stramenopiles;Ochrophyta;Pelagophyceae;Sarcinochrysidales;	0	0	0.0264	0	0	0.0097	0.0217	0.0043	0	0.0057	0
Eukaryota;SAR;Stramenopiles;Ochrophyta;Phaeophyceae;Desmarestiales;Desmarestia;	0	0	0.0014	0	0	0	0	0	0	0	0
Eukaryota;SAR;Stramenopiles;Ochrophyta;Phaeophyceae;Ectocarpales;Bodanella;	0.0025	0	0.0028	0.0023	0.0026	0.0012	0	0	0	0.0028	0.0007
Eukaryota;SAR;Stramenopiles;Ochrophyta;Phaeophyceae;Ectocarpales;Ectocarpus;	0	0	0	0.0012	0	0	0	0	0.0013	0	0
Eukaryota;SAR;Stramenopiles;Ochrophyta;Phaeophyceae;Ectocarpales;Phaeostrophion;	0	0	0	0	0	0	0	0	0	0	0.0007
Eukaryota;SAR;Stramenopiles;Ochrophyta;Raphidophyceae;	0.0012	0	0.0014	0.0023	0.0009	0	0	0	0	0	0
Eukaryota;SAR;Stramenopiles;Ochrophyta;Raphidophyceae;Chattonellales;Gonyostomum;	0	0.0011	0	0	0	0	0	0	0	0	0
Eukaryota;SAR;Stramenopiles;Ochrophyta;Raphidophyceae;Chattonellales;Haramonas;	0	0	0.0014	0	0.0009	0	0	0	0	0	0
Eukaryota;SAR;Stramenopiles;Ochrophyta;Raphidophyceae;Chattonellales;MOCH-3;	0	0	0	0	0.0009	0	0	0	0	0	0
Eukaryota;SAR;Stramenopiles;Ochrophyta;Raphidophyceae;Chattonellales;Vacuolaria;	0	0	0	0	0	0	0	0	0	0	0.0007
Eukaryota;SAR;Stramenopiles;Ochrophyta;Xanthophyceae;Mischococcales;Bumilleriopsis;	0	0	0	0	0	0	0	0	0	0	0.0007
Eukaryota;SAR;Stramenopiles;Ochrophyta;Xanthophyceae;Tribonematales;Xanthonema;	0	0	0	0	0	0	0	0	0	0.0014	0
Eukaryota;SAR;Stramenopiles;Ochrophyta;Xanthophyceae;uncultured;	0	0	0	0	0	0.0024	0	0	0.0026	0	0
Eukaryota;SAR;Stramenopiles;Peronosporomycetes;	0	0.0011	0	0	0	0	0.001	0	0	0	0
Eukaryota;SAR;Stramenopiles;Peronosporomycetes;uncultured;	0.0062	0	0.0014	0	0.0018	0	0.0021	0.0026	0	0	0.0022
Eukaryota;uncultured;	0	0	0.0042	0	0	0	0.001	0	0	0	0
No Relative	2.5181	1.0656	1.2198	1.3229	2.7754	3.996	1.2778	5.4819	1.6704	3.0557	1.8285

## Sheet: Supplementary_table_S5
Supplementary table S5. Relative abundance of phylogenetic groups across long read PacBio metagenomes derived from 16S rRNA gene composition. 16S rRNA genes >1 Kbp in length were extracted from raw reads using Barrnap, clustered at 99% identity threshold using CD-HIT-EST and phylogenetically placed into the SILVA 138 NR99 reference tree using parsimony in ARB.
Taxa	FRAM18_4571_H	FRAM18_4571_I	FRAM18_4571_K
Archaea;Euryarchaeota;Thermoplasmata;Marine Group II;	0.3875	1.0035	1.7723
Archaea;Euryarchaeota;Thermoplasmata;Marine Group III;	0	0.0251	0
Archaea;Thaumarchaeota;Nitrososphaeria;Nitrosopumilales;Nitrosopumilaceae;Candidatus Nitrosopumilus;	1.2635	0.1254	0.1437
Bacteria;Actinobacteria;Acidimicrobiia;Actinomarinales;Actinomarinaceae;Candidatus Actinomarina;	0.0674	0.1004	0.3672
Bacteria;Actinobacteria;Acidimicrobiia;Microtrichales;Ilumatobacteraceae;Ilumatobacter;	0.0337	0.3512	0.1118
Bacteria;Actinobacteria;Acidimicrobiia;Microtrichales;Microtrichaceae;Sva0996 marine group;	0.1516	0.0251	0.0319
Bacteria;Actinobacteria;Acidimicrobiia;Microtrichales;uncultured;	0.0168	0	0
Bacteria;Actinobacteria;Actinobacteria;Micrococcales;Microbacteriaceae;Candidatus Aquiluna;	0	0.1254	0.016
Bacteria;Actinobacteria;Actinobacteria;Micrococcales;Microbacteriaceae;Mycetocola;	0	0.0502	0
Bacteria;Actinobacteria;Actinobacteria;Micrococcales;Microbacteriaceae;XZXXH163;	0.0168	0	0
Bacteria;Actinobacteria;Actinobacteria;Micrococcales;Sanguibacteraceae;Sanguibacter;	0.0337	0	0
Bacteria;Actinobacteria;Actinobacteria;PeM15;	0.0337	0.0753	0.1277
Bacteria;Actinobacteria;Actinobacteria;Streptomycetales;Streptomycetaceae;Allostreptomyces;	0.0842	0	0
Bacteria;Bacteroidetes;Bacteroidia;Chitinophagales;Saprospiraceae;uncultured;	0	0.0251	0.2714
Bacteria;Bacteroidetes;Bacteroidia;Cytophagales;Cyclobacteriaceae;Marinoscillum;	0.4212	0.5018	0.5109
Bacteria;Bacteroidetes;Bacteroidia;Cytophagales;Cyclobacteriaceae;uncultured;	0	0.0753	0.1118
Bacteria;Bacteroidetes;Bacteroidia;Flavobacteriales;Crocinitomicaceae;Crocinitomix;	0	0.0502	0
Bacteria;Bacteroidetes;Bacteroidia;Flavobacteriales;Crocinitomicaceae;Fluviicola;	0	2.5339	0.8462
Bacteria;Bacteroidetes;Bacteroidia;Flavobacteriales;Cryomorphaceae;NS10 marine group;	0.1516	0.1756	0.1437
Bacteria;Bacteroidetes;Bacteroidia;Flavobacteriales;Cryomorphaceae;uncultured;	0.1516	2.283	1.7883
Bacteria;Bacteroidetes;Bacteroidia;Flavobacteriales;Flavobacteriaceae;Aurantivirga;	0.1348	4.2398	0.4151
Bacteria;Bacteroidetes;Bacteroidia;Flavobacteriales;Flavobacteriaceae;Flavicella;	0	0.0251	0
Bacteria;Bacteroidetes;Bacteroidia;Flavobacteriales;Flavobacteriaceae;Formosa;	0.0337	3.4621	4.0077
Bacteria;Bacteroidetes;Bacteroidia;Flavobacteriales;Flavobacteriaceae;Lacinutrix;	0	0	0.016
Bacteria;Bacteroidetes;Bacteroidia;Flavobacteriales;Flavobacteriaceae;Lutibacter;	0	0	0.016
Bacteria;Bacteroidetes;Bacteroidia;Flavobacteriales;Flavobacteriaceae;NS2b marine group;	0.7412	0.276	0.479
Bacteria;Bacteroidetes;Bacteroidia;Flavobacteriales;Flavobacteriaceae;NS3a marine group;	0	0.0251	0.0958
Bacteria;Bacteroidetes;Bacteroidia;Flavobacteriales;Flavobacteriaceae;NS4 marine group;	1.2635	2.3833	1.4051
Bacteria;Bacteroidetes;Bacteroidia;Flavobacteriales;Flavobacteriaceae;NS5 marine group;	2.847	4.3151	5.7321
Bacteria;Bacteroidetes;Bacteroidia;Flavobacteriales;Flavobacteriaceae;Polaribacter 1;	1.5162	3.9137	0.8143
Bacteria;Bacteroidetes;Bacteroidia;Flavobacteriales;Flavobacteriaceae;Polaribacter 2;	0	0	0.0958
Bacteria;Bacteroidetes;Bacteroidia;Flavobacteriales;Flavobacteriaceae;Polaribacter 3;	0	0	0.0319
Bacteria;Bacteroidetes;Bacteroidia;Flavobacteriales;Flavobacteriaceae;Polaribacter 4;	0.0505	0	0
Bacteria;Bacteroidetes;Bacteroidia;Flavobacteriales;Flavobacteriaceae;Polaribacter;	0	0.0753	0
Bacteria;Bacteroidetes;Bacteroidia;Flavobacteriales;Flavobacteriaceae;Pseudofulvibacter;	0	0	0.0958
Bacteria;Bacteroidetes;Bacteroidia;Flavobacteriales;Flavobacteriaceae;Psychroserpens;	0	0	0.0319
Bacteria;Bacteroidetes;Bacteroidia;Flavobacteriales;Flavobacteriaceae;Ulvibacter;	0.2695	2.4837	1.1336
Bacteria;Bacteroidetes;Bacteroidia;Flavobacteriales;Flavobacteriaceae;uncultured;	0.2358	7.702	3.4808
Bacteria;Bacteroidetes;Bacteroidia;Flavobacteriales;NS7 marine group;	0.0505	0.3261	0.7824
Bacteria;Bacteroidetes;Bacteroidia;Flavobacteriales;NS9 marine group;	1.5667	4.7416	1.6765
Bacteria;Bacteroidetes;Bacteroidia;Sphingobacteriales;NS11-12 marine group;	0.0168	0.2258	0.1437
Bacteria;Chloroflexi;Dehalococcoidia;SAR202 clade;	0.0168	0	0
Bacteria;Cyanobacteria;Oxyphotobacteria;Chloroplast;	15.9704	2.0321	10.6658
Bacteria;Cyanobacteria;Oxyphotobacteria;Synechococcales;Cyanobiaceae;Synechococcus CC9902;	0	0.0251	0.1597
Bacteria;Epsilonbacteraeota;Campylobacteria;Campylobacterales;Arcobacteraceae;Arcobacter;	0	0.0251	0
Bacteria;Fibrobacteres;Fibrobacteria;Fibrobacterales;Fibrobacteraceae;uncultured;	0	0.0753	0
Bacteria;Marinimicrobia (SAR406 clade);	0	0.0251	0.016
Bacteria;Nitrospinae;Nitrospinia;Nitrospinales;Nitrospinaceae;LS-NOB;	0.0337	0	0
Bacteria;Nitrospinae;Nitrospinia;Nitrospinales;Nitrospinaceae;Nitrospina;	0.0168	0	0
Bacteria;Proteobacteria;Alphaproteobacteria;Kordiimonadales;Kordiimonadaceae;Kordiimonas;	0.0674	0	0
Bacteria;Proteobacteria;Alphaproteobacteria;Kordiimonadales;uncultured;	0.0168	0.3261	0.2235
Bacteria;Proteobacteria;Alphaproteobacteria;Parvibaculales;OCS116 clade;	0.1348	0.0753	0.3353
Bacteria;Proteobacteria;Alphaproteobacteria;Puniceispirillales;SAR116 clade;	1.1792	0.4014	1.5488
Bacteria;Proteobacteria;Alphaproteobacteria;Rhizobiales;Devosiaceae;Devosia;	0.0168	0	0
Bacteria;Proteobacteria;Alphaproteobacteria;Rhizobiales;Devosiaceae;Maritalea;	0.0168	0	0
Bacteria;Proteobacteria;Alphaproteobacteria;Rhizobiales;Devosiaceae;Pelagibacterium;	0.0168	0	0
Bacteria;Proteobacteria;Alphaproteobacteria;Rhizobiales;Rhizobiaceae;Lentilitoribacter;	0.0168	0	0
Bacteria;Proteobacteria;Alphaproteobacteria;Rhizobiales;Rhodobiaceae;Afifella;	0.0337	0	0
Bacteria;Proteobacteria;Alphaproteobacteria;Rhodobacterales;Rhodobacteraceae;Aliiroseovarius;	0	0	0.016
Bacteria;Proteobacteria;Alphaproteobacteria;Rhodobacterales;Rhodobacteraceae;Amylibacter;	0.0337	2.1074	2.8261
Bacteria;Proteobacteria;Alphaproteobacteria;Rhodobacterales;Rhodobacteraceae;Ascidiaceihabitans;	0.0168	0.7025	3.0177
Bacteria;Proteobacteria;Alphaproteobacteria;Rhodobacterales;Rhodobacteraceae;Lentibacter;	0	0	0.016
Bacteria;Proteobacteria;Alphaproteobacteria;Rhodobacterales;Rhodobacteraceae;Loktanella;	0	0.0251	0
Bacteria;Proteobacteria;Alphaproteobacteria;Rhodobacterales;Rhodobacteraceae;Octadecabacter;	0	0.0753	0
Bacteria;Proteobacteria;Alphaproteobacteria;Rhodobacterales;Rhodobacteraceae;Planktomarina;	2.9987	2.2077	4.9976
Bacteria;Proteobacteria;Alphaproteobacteria;Rhodobacterales;Rhodobacteraceae;Roseobacter clade NAC11-7 lineage;	0	0.0251	0.0479
Bacteria;Proteobacteria;Alphaproteobacteria;Rhodobacterales;Rhodobacteraceae;Sulfitobacter;	0.0505	2.4586	3.9917
Bacteria;Proteobacteria;Alphaproteobacteria;Rhodobacterales;Rhodobacteraceae;Tateyamaria;	0	0.0251	0
Bacteria;Proteobacteria;Alphaproteobacteria;Rhodobacterales;Rhodobacteraceae;uncultured;	0.8929	1.4049	0.479
Bacteria;Proteobacteria;Alphaproteobacteria;Rhodospirillales;AEGEAN-169 marine group;	0.5728	0	0.1916
Bacteria;Proteobacteria;Alphaproteobacteria;Rhodospirillales;Magnetospiraceae;Magnetospira;	0.1348	0.1505	0.0319
Bacteria;Proteobacteria;Alphaproteobacteria;Rhodospirillales;Magnetospiraceae;uncultured;	0.1348	0	0.0319
Bacteria;Proteobacteria;Alphaproteobacteria;Rhodovibrionales;Kiloniellaceae;uncultured;	0.0337	0	0
Bacteria;Proteobacteria;Alphaproteobacteria;Rickettsiales;Mitochondria;	0.0168	0.0753	0
Bacteria;Proteobacteria;Alphaproteobacteria;Rickettsiales;Rickettsiaceae;Candidatus Megaira;	0	0.0251	0
Bacteria;Proteobacteria;Alphaproteobacteria;Rickettsiales;Rickettsiaceae;uncultured;	0	0.0502	0
Bacteria;Proteobacteria;Alphaproteobacteria;SAR11 clade;Clade I;Clade Ia;	26.4488	13.5474	21.6989
Bacteria;Proteobacteria;Alphaproteobacteria;SAR11 clade;Clade I;uncultured;	0.0505	0	0.016
Bacteria;Proteobacteria;Alphaproteobacteria;SAR11 clade;Clade II;	4.6496	2.3833	3.0177
Bacteria;Proteobacteria;Alphaproteobacteria;SAR11 clade;Clade III;	0.7749	0.0502	0.1277
Bacteria;Proteobacteria;Alphaproteobacteria;SAR11 clade;Clade IV;	0.9265	0.1004	1.6765
Bacteria;Proteobacteria;Alphaproteobacteria;SAR11 clade;uncultured;	0.0674	0	0.016
Bacteria;Proteobacteria;Alphaproteobacteria;Sneathiellales;Sneathiellaceae;AT-s3-44;	0.0674	0	0
Bacteria;Proteobacteria;Alphaproteobacteria;Thalassobaculales;Nisaeaceae;OM75 clade;	0.2022	0	0.0479
Bacteria;Proteobacteria;Alphaproteobacteria;uncultured;	0.4043	0.0251	0.0798
Bacteria;Proteobacteria;Deltaproteobacteria;Bdellovibrionales;Bacteriovoracaceae;Peredibacter;	0	0.0251	0
Bacteria;Proteobacteria;Deltaproteobacteria;SAR324 clade(Marine group B);	0	0.0502	0.0639
Bacteria;Proteobacteria;Gammaproteobacteria;Alteromonadales;Alteromonadaceae;Paraglaciecola;	0.0337	0.0251	0
Bacteria;Proteobacteria;Gammaproteobacteria;Alteromonadales;Colwelliaceae;Colwellia;	0	0.0502	0.0798
Bacteria;Proteobacteria;Gammaproteobacteria;Alteromonadales;Colwelliaceae;uncultured;	0	0	0.016
Bacteria;Proteobacteria;Gammaproteobacteria;Alteromonadales;Marinobacteraceae;Marinobacter;	0.0168	0	0
Bacteria;Proteobacteria;Gammaproteobacteria;Arenicellales;Arenicellaceae;Arenicella;	0	0.1004	0
Bacteria;Proteobacteria;Gammaproteobacteria;Arenicellales;Arenicellaceae;uncultured;	0.0505	0	0
Bacteria;Proteobacteria;Gammaproteobacteria;Betaproteobacteriales;Methylophilaceae;OM43 clade;	1.314	0.9533	0.7824
Bacteria;Proteobacteria;Gammaproteobacteria;Betaproteobacteriales;Nitrosomonadaceae;Nitrosomonas;	0	0.0251	0
Bacteria;Proteobacteria;Gammaproteobacteria;Cellvibrionales;Cellvibrionaceae;uncultured;	0	0.0251	0
Bacteria;Proteobacteria;Gammaproteobacteria;Cellvibrionales;Halieaceae;OM60(NOR5) clade;	0.219	5.9709	0.7504
Bacteria;Proteobacteria;Gammaproteobacteria;Cellvibrionales;Porticoccaceae;Porticoccus;	0.1853	0	0
Bacteria;Proteobacteria;Gammaproteobacteria;Cellvibrionales;Porticoccaceae;SAR92 clade;	3.9589	1.9819	1.3572
Bacteria;Proteobacteria;Gammaproteobacteria;Cellvibrionales;Spongiibacteraceae;BD1-7 clade;	0	0	0.1437
Bacteria;Proteobacteria;Gammaproteobacteria;Cellvibrionales;Spongiibacteraceae;Sinobacterium;	0.0337	0	0
Bacteria;Proteobacteria;Gammaproteobacteria;Cellvibrionales;Spongiibacteraceae;Zhongshania;	0	0	0.016
Bacteria;Proteobacteria;Gammaproteobacteria;Cellvibrionales;Spongiibacteraceae;uncultured;	0	0.0251	0
Bacteria;Proteobacteria;Gammaproteobacteria;Chromatiales;Sedimenticolaceae;Candidatus Thiodiazotropha;	0.0168	0	0
Bacteria;Proteobacteria;Gammaproteobacteria;Chromatiales;Sedimenticolaceae;Sedimenticola;	0.0168	0	0
Bacteria;Proteobacteria;Gammaproteobacteria;Chromatiales;Sedimenticolaceae;uncultured;	0.1011	0	0
Bacteria;Proteobacteria;Gammaproteobacteria;Ectothiorhodospirales;Ectothiorhodospiraceae;uncultured;	0.5896	0	0
Bacteria;Proteobacteria;Gammaproteobacteria;Ga0077536;	0.0168	0	0
Bacteria;Proteobacteria;Gammaproteobacteria;Gammaproteobacteria Incertae Sedis;Unknown Family;Alkalimarinus;	0.0168	0	0
Bacteria;Proteobacteria;Gammaproteobacteria;KI89A clade;	0.0337	0	0.2235
Bacteria;Proteobacteria;Gammaproteobacteria;Methylococcales;Cycloclasticaceae;Cycloclasticus;	0.0337	0	0
Bacteria;Proteobacteria;Gammaproteobacteria;Nitrosococcales;Methylophagaceae;uncultured;	0.2695	0.5018	0.479
Bacteria;Proteobacteria;Gammaproteobacteria;OM182 clade;	0.4212	0.4265	0.2714
Bacteria;Proteobacteria;Gammaproteobacteria;Oceanospirillales;Nitrincolaceae;uncultured;	5.1381	5.2935	5.0295
Bacteria;Proteobacteria;Gammaproteobacteria;Oceanospirillales;Pseudohongiellaceae;Pseudohongiella;	0.9602	0.3261	0.495
Bacteria;Proteobacteria;Gammaproteobacteria;Oceanospirillales;Saccharospirillaceae;Reinekea;	0	0.0251	0
Bacteria;Proteobacteria;Gammaproteobacteria;Oceanospirillales;Saccharospirillaceae;uncultured;	0	0.0502	0
Bacteria;Proteobacteria;Gammaproteobacteria;Pseudomonadales;Pseudomonadaceae;Pseudomonas;	0	0.0502	0.0319
Bacteria;Proteobacteria;Gammaproteobacteria;SAR86 clade;	7.5977	2.4586	3.0018
Bacteria;Proteobacteria;Gammaproteobacteria;SS1-B-07-19;	0.0168	0	0
Bacteria;Proteobacteria;Gammaproteobacteria;Steroidobacterales;Woeseiaceae;Woeseia;	0.1348	0.2258	0.016
Bacteria;Proteobacteria;Gammaproteobacteria;Tenderiales;Tenderiaceae;Candidatus Tenderia;	0.0168	0	0.0479
Bacteria;Proteobacteria;Gammaproteobacteria;Thiohalorhabdales;Thiohalorhabdaceae;uncultured;	0	0.4265	0.6227
Bacteria;Proteobacteria;Gammaproteobacteria;Thiomicrospirales;Thioglobaceae;SUP05 cluster;	8.0526	0.5268	0.6387
Bacteria;Proteobacteria;Gammaproteobacteria;Thiotrichales;Thiotrichaceae;uncultured;	0.3032	0.3011	0.3034
Bacteria;Proteobacteria;Gammaproteobacteria;UBA4486;	0.0674	0	0
Bacteria;Verrucomicrobia;Verrucomicrobiae;Opitutales;Puniceicoccaceae;Lentimonas;	0	0.4014	0.8143
Bacteria;Verrucomicrobia;Verrucomicrobiae;Opitutales;Puniceicoccaceae;MB11C04 marine group;	0	0.0251	0
Bacteria;Verrucomicrobia;Verrucomicrobiae;Opitutales;Puniceicoccaceae;Verruc-01;	0	0.0251	0
Bacteria;Verrucomicrobia;Verrucomicrobiae;Verrucomicrobiales;Rubritaleaceae;Luteolibacter;	0	8.4295	0.5269
Bacteria;Verrucomicrobia;Verrucomicrobiae;Verrucomicrobiales;Rubritaleaceae;Roseibacillus;	0.0168	0.1254	0.9261
Bacteria;Verrucomicrobia;Verrucomicrobiae;Verrucomicrobiales;Rubritaleaceae;Rubritalea;	0	0.2258	0
No Relative	2.8133	0.7777	1.3891
