# Supplementary material for: Microbial metagenome-assembled genomes of the Fram Strait from short and long read sequencing platforms
Source: PeerJ journal article supplement (doi:10.7717/peerj.11721), 2021-06-30
Supplement: Supplementary_Figure_S1_with_legend.pdf [file Supplementary_Figure_S1_with_legend.pdf]

**FRAM18\_4502\_E\_R1**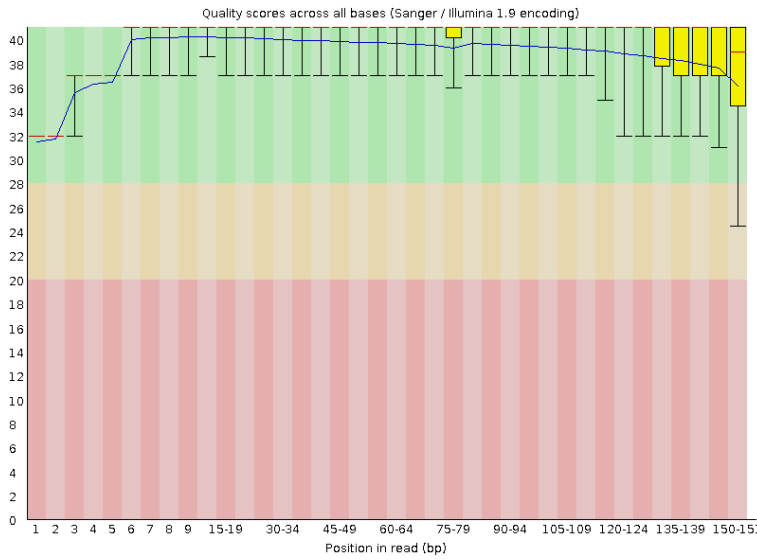**FRAM18\_4502\_E\_R2**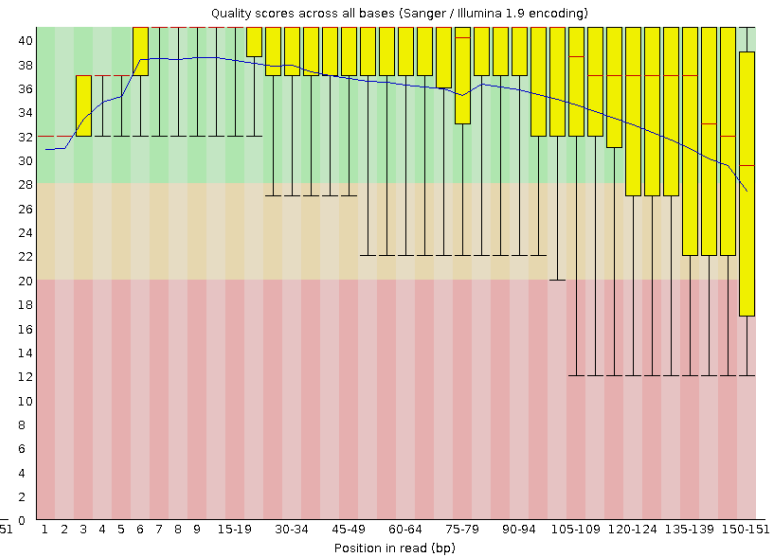**FRAM18\_4502\_G\_R1**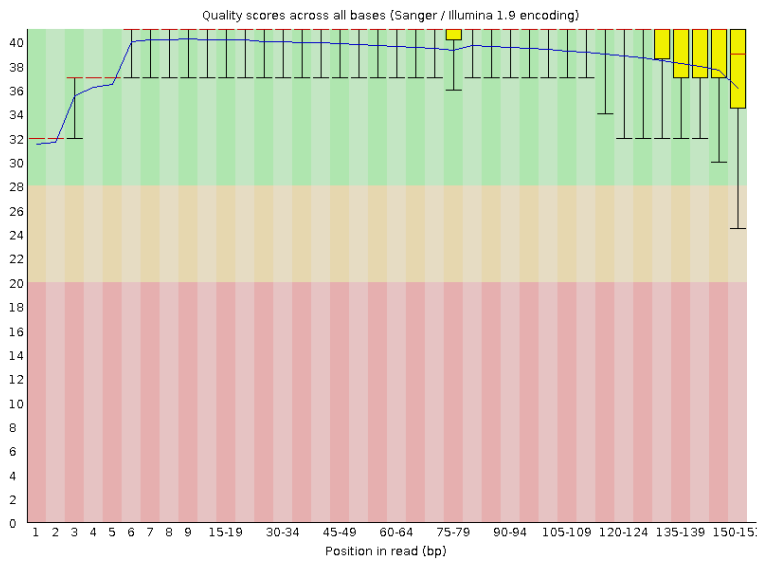**FRAM18\_4502\_G\_R2**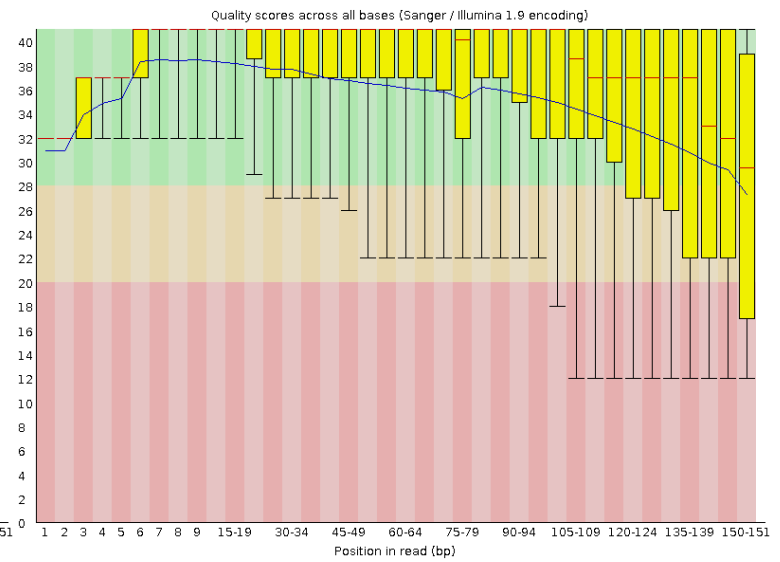**FRAM18\_4571\_PB\_I**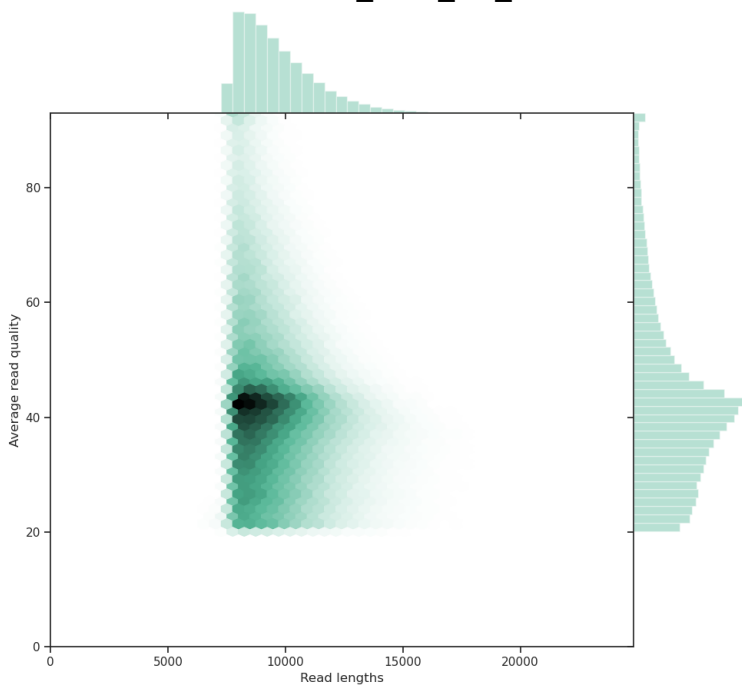**FRAM18\_4571\_PB\_K**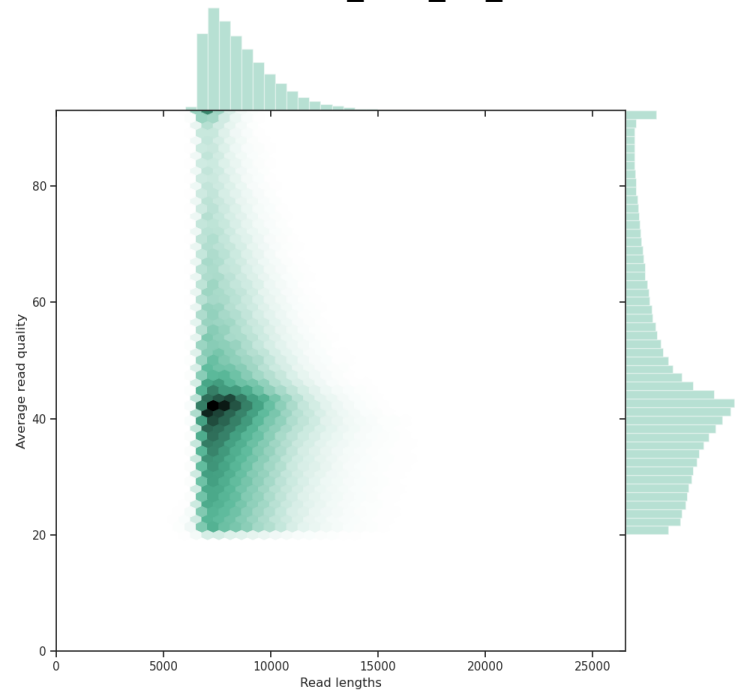

**Supplementary Figure S1. Visualisation of sequence over length.** Upper four plots are example outputs of FastQC that summarises the per base sequence quality of Illumina reads. The bottom two plots are example outputs of NanoPlot that summarises the average read quality for different read lengths.
