# Supplementary material for: Microbial metagenome-assembled genomes of the Fram Strait from short and long read sequencing platforms
Source: PeerJ journal article supplement (doi:10.7717/peerj.11721), 2021-06-30
Supplement: Supplementary_Figure_S2_with_legend.pdf [file Supplementary_Figure_S2_with_legend.pdf]

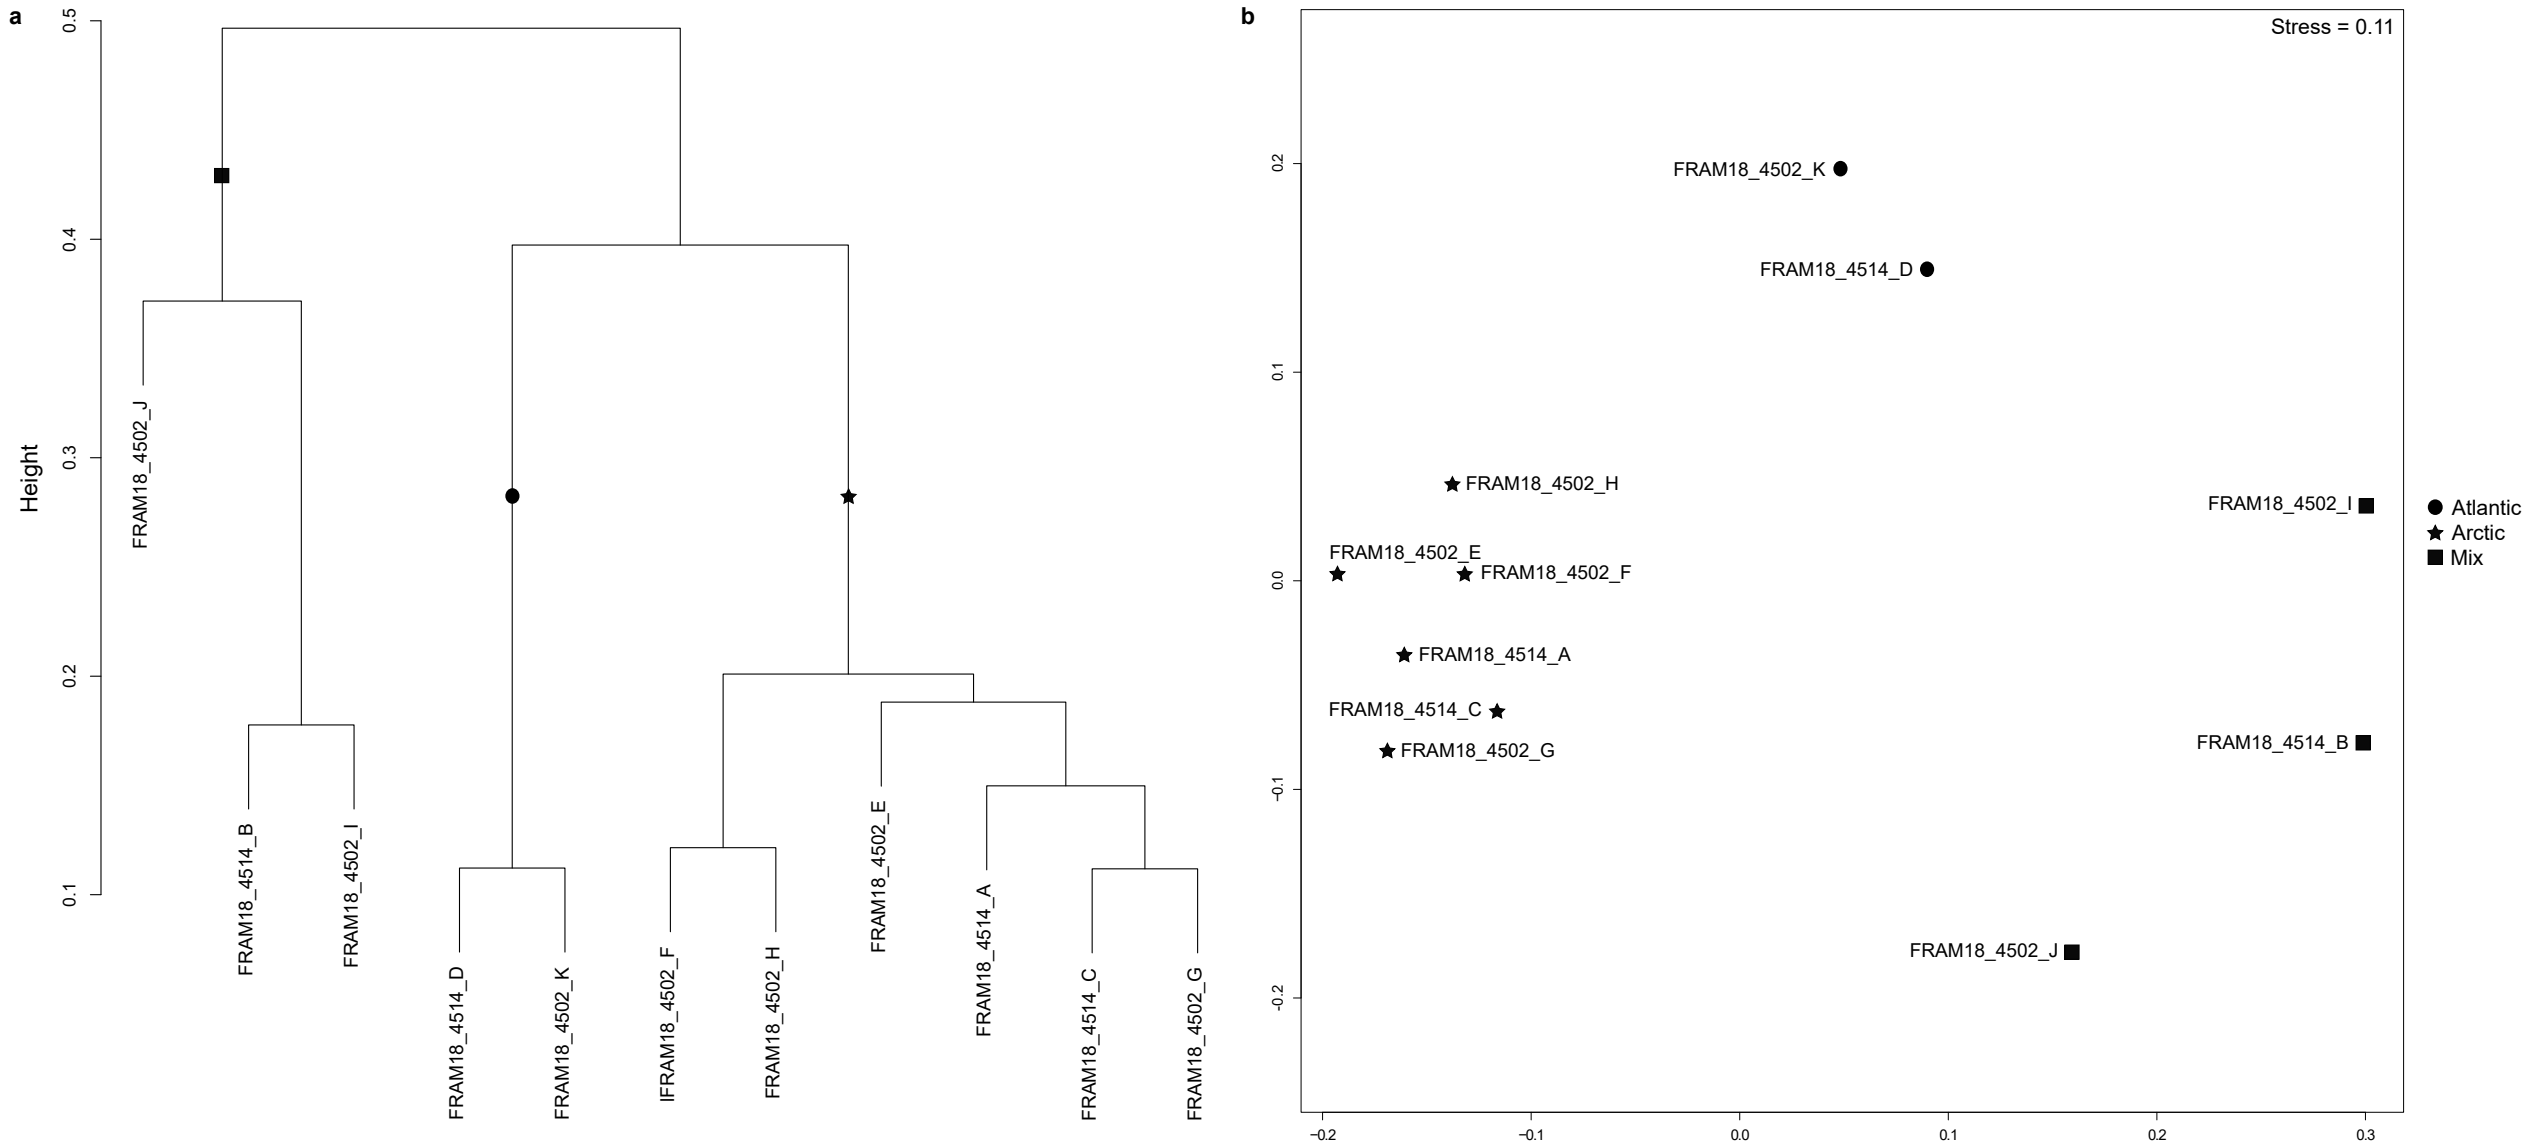

**Supplementary Figure S2. Comparison of metagenomic samples based on Bray-Curtis dissimilarity of 16S rRNA gene composition. a)** Dendrogram generated from Bray-Curtis dissimilarity matrix of samples' community composition at a genus level, **b)** Non-metric multi-dimensional scaling ordination of Bray-Curtis dissimilarity of samples' community composition at a genus level.
